# Supplementary material for: Computational insight into the reactivity of FOX-7 and its bridge-ring energetic derivatives from Diels–Alder reactions
Source: Royal Society of Chemistry journal article supplement (doi:10.1039/d4nj01262c), 2024-01-01
Supplement: d4nj01262c1.pdf [file d4nj01262c1.pdf]

## Electronic Supplementary Information

### Computational insight into the reactivity of FOX-7 and its bridge-ring energetic derivatives from Diels-Alder reactions

Mei Xue <sup>a</sup>, Yunlu Li <sup>b</sup>, Pengcheng Zhang <sup>c</sup>, Chunlin He <sup>\*a</sup>

<sup>a</sup> Experimental Center of Advanced Materials, School of Materials Science & Engineering, Beijing Institute of Technology, Beijing 100081, China.

<sup>b</sup> School of Environment and Safety Engineering, North University of China, Taiyuan 030051, China.

<sup>c</sup> Research Institute of Chemical Defense, Academy of Military Sciences, Beijing 102205, China.

\* corresponding authors:

E-mail: chunlinhe@bit.edu.cn

## Contents

|                                                                                                                                                                               |     |
|-------------------------------------------------------------------------------------------------------------------------------------------------------------------------------|-----|
| <b>Theoretical calculation methods</b> .....                                                                                                                                  | S1  |
| <b>Table S1</b> The $E_{\text{LUMO}}$ , $E_{\text{HOMO}}$ , $\mu$ , $N$ and $\omega$ of the dienes .....                                                                      | S3  |
| <b>Table S2</b> Energy barrier for electron transfer between dienes and FOX-7.....                                                                                            | S4  |
| <b>Fig. S1</b> The HOMO and LUMO pictures .....                                                                                                                               | S5  |
| <b>Fig. S2</b> The molecular surface electrostatic potential maps of preferred dienes and FOX-7 .....                                                                         | S5  |
| <b>The Cartesian coordinates of transition states (TSs) and intermediate products (IMs)</b> .....                                                                             | S6  |
| <b>Fig. S3</b> The optimized structures of the compounds <b>P1-1~P3-4</b> .....                                                                                               | S48 |
| <b>Fig. S4</b> The optimized structures of the compounds <b>P4-1~P6-4</b> .....                                                                                               | S49 |
| <b>Table S3</b> Bond lengths (BL) and Laplacian bond order (LBO) of the compounds <b>P1-1~P1-4</b> .....                                                                      | S50 |
| <b>Table S4</b> Bond lengths (BL) and Laplacian bond order (LBO) of the compounds <b>P2-1~P2-4</b> .....                                                                      | S50 |
| <b>Table S5</b> Bond lengths (BL) and Laplacian bond order (LBO) of the compounds <b>P3-1~P3-4</b> .....                                                                      | S51 |
| <b>Table S6</b> Bond lengths (BL) and Laplacian bond order (LBO) of the compounds <b>P4-1~P4-4</b> .....                                                                      | S51 |
| <b>Table S7</b> Bond lengths (BL) and Laplacian bond order (LBO) of the compounds <b>P5-1~P5-4</b> .....                                                                      | S52 |
| <b>Table S8</b> Bond lengths (BL) and Laplacian bond order (LBO) of the compounds <b>P6-1~P6-4</b> .....                                                                      | S52 |
| <b>Scheme S1</b> Isodesmic reactions for the designed bridge-ring energetic compounds .....                                                                                   | S53 |
| <b>Table S9</b> $E_0$ , ZPE, $H_{\text{T}}$ and $\Delta H_{\text{f, gas}}$ of the reference compounds .....                                                                   | S54 |
| <b>Table S10</b> $\Delta H_{\text{f, gas}}$ , $\Delta H_{\text{sub}}$ and $\Delta H_{\text{f, solid}}$ of the designed compounds and the related calculation parameters ..... | S54 |
| <b>Table S11</b> Surface electrostatic potential parameters of the designed bridge-ring energetic molecules .....                                                             | S55 |
| <b>References</b> .....                                                                                                                                                       | S56 |

## Theoretical calculation methods

The electronic chemical potential ( $\mu$ ), global electrophilicity index ( $\omega$ ), and global nucleophilicity index ( $N$ ) of FOX-7 and selected dienes were calculated by eqn (1)-(3).<sup>[1-2]</sup>

$$\mu = (E_{\text{LUMO}} + E_{\text{HOMO}}) / 2 \quad (1)$$

$$\omega = \mu^2 / 2(E_{\text{LUMO}} - E_{\text{HOMO}}) \quad (2)$$

$$N = E_{\text{HOMO}} - E_{\text{LUMO-TCE}} \quad (3)$$

In which, HOMO and LUMO are the highest occupied molecular orbital and lowest unoccupied molecular orbital, respectively; and the HOMO and LUMO are analyzed at the B3LYP/6-31G(d) level.  $E_{\text{HOMO}}$  and  $E_{\text{LUMO}}$  are the energies of the HOMO and LUMO, respectively. TCE is tetracyanoethylene.

The solid-phase enthalpy of formation ( $\Delta H_{\text{f, solid}}$ ) was calculated according to Hess's law of constant heat summation (eqn (4)).<sup>[3]</sup> In which, gas-phase enthalpy of formation ( $\Delta H_{\text{f, gas}}$ ) was predicted via isodesmic reactions. The  $\Delta H_{\text{f, gas}}$  at 298K can be expressed as eqn (5) and also can be calculated by eqn (6) based on the isodesmic reaction.<sup>[4-6]</sup> The heat of sublimation ( $\Delta H_{\text{sub}}$ ) was calculated by the empirical formula eqn (7) proposed by Politzer et al.<sup>[7-8]</sup>

$$\Delta H_{\text{f, solid}} = \Delta H_{\text{f, gas}} - \Delta H_{\text{sub}} \quad (4)$$

$$\Delta H_{\text{f, gas}} = \sum \Delta H_{\text{f,P}} - \sum \Delta H_{\text{f,R}} \quad (5)$$

$$\Delta H_{\text{f, gas}} = \Delta E + \Delta(PV) = \Delta E_0 + \Delta ZPE + \Delta H_{\text{T}} + \Delta nRT \quad (6)$$

In which,  $\Delta H_{\text{f,P}}$  and  $\Delta H_{\text{f,R}}$  are the enthalpy of formation (HOF) of the products and reactants in the isodesmic reaction at 298 K, respectively;  $\Delta E_0$  is the change in total energy between the products and reactants at 0 K;  $\Delta ZPE$  is the difference between the zero-point energy (ZPE) of the products and reactants at 0 K;  $\Delta H_{\text{T}}$  is the thermal correction from 0 to 298 K; the  $\Delta(PV)$  value is the PV work term and equals  $\Delta nRT$  for the reactions of ideal gas, and  $\Delta n=0$  for the isodesmic reactions. For the reference compounds without experimental HOF values, their HOF values were obtained by atomization reaction  $C_aH_bO_cN_d(g) \rightarrow aC(g) + bH(g) + cO(g) + dN(g)$  using the highly accurate G2 method.

$$\Delta H_{\text{sub}} = aA^2 + b(\nu\sigma_{\text{tot}}^2)^{0.5} + c \quad (7)$$

In which,  $A$  represents the surface area of the 0.001 electrons per bohr<sup>3</sup> isosurface of electron density of the molecule;  $\nu$  quantifies the degree of balance between the positive and negative potentials on the molecular surface;  $\sigma_{\text{tot}}^2$  is the total variance of the electrostatic potential; the coefficients  $a$ ,  $b$  and  $c$  were expressed as  $2.670 \times 10^{-4} \text{ kcal} \cdot \text{mol}^{-1} \cdot \text{\AA}^{-4}$ ,  $1.650 \text{ kcal} \cdot \text{mol}^{-1}$  and  $2.966 \text{ kcal} \cdot \text{mol}^{-1}$ .<sup>[9]</sup>  $A$ ,  $\nu$ , and  $\sigma_{\text{tot}}^2$  were calculated by the Multiwfn program.<sup>[10]</sup>

The crystal density ( $\rho$ ) of the designed energetic compounds was calculated using the improved calculation formula (eqn (8)) proposed by Politzer et al.<sup>[11]</sup>

$$\rho = \alpha \left( \frac{M}{V_{\text{m}}} \right) + \beta (\nu\sigma_{\text{tot}}^2) + \gamma \quad (8)$$

In which,  $M$  is the molecular mass,  $\text{g} \cdot \text{mol}^{-1}$ ;  $V_{\text{m}}$  is the volume inside the 0.001 electrons per bohr<sup>3</sup> isosurface of electron density surrounding the molecule,  $\text{cm}^3 \cdot \text{mol}^{-1}$ ;  $\sigma_{\text{tot}}^2$  is the total variance of the electrostatic potential;  $\nu$  quantifies the degree of balance between the positive and negative potentials on the molecular surface; the product

$v\sigma_{\text{tot}}^2$  proved to be an excellent index of electrostatic interactive tendencies; the fit parameters  $\alpha$ ,  $\beta$  and  $\gamma$  are 1.0462, 0.0021 and -0.1586, respectively [12].

Detonation velocity ( $D$ ), detonation pressure ( $P$ ), heat of detonation ( $Q$ ) and strength ( $\Delta V_{\text{TrauZl}}$ ) are important parameters to characterize detonation performance of energetic materials. And the values of  $Q$ ,  $D$  and  $P$  in this work were calculated by EXPLO5 (V6.05.04) program. The  $\Delta V_{\text{TrauZl}}$  were estimated by eqn (9) for  $\text{C}_a\text{H}_b\text{O}_c\text{N}_d$  compounds proposed by Keshavarz et al. [13]

$$\Delta V_{\text{TrauZl}} = 1101 - 19248(a / M_w) - 14925(d / M_w) + 64.13(\Delta H_{\text{f,solid}} / M_w) \quad (9)$$

In which,  $a$  and  $d$  are the number of C and N atoms in the molecule, respectively;  $M_w$  is the molecular weight;  $\Delta H_{\text{f,solid}}$  is the solid-phase heat of formation,  $\text{kJ}\cdot\text{mol}^{-1}$ .

Impact sensitivity is usually expressed as drop height marked  $h_{50}$  in cm. Here the  $h_{50}$  was predicted using eqn (10) proposed by Pospíšil et al. [14]

$$h_{50} = \alpha\sigma_+^2 + \beta\nu + \gamma \quad (10)$$

In which,  $\sigma_+^2$  indicates the strengths and variabilities of the positive surface potentials;  $\nu$  quantifies the degree of balance between the positive and negative potentials on the molecular surface; The coefficients  $\alpha$ ,  $\beta$  and  $\gamma$  are -0.0064, 241.42 and -3.43, respectively. [14-15]

Oxygen balance (OB) is an important parameter that describes the level of oxygen and closely related to the detonation performance for energetic compounds. The OB for  $\text{C}_a\text{H}_b\text{N}_c\text{O}_d$  molecules with the molecular weight  $M_w$  can be calculated by eqn (11).

$$\text{OB} = 1600 \times (d - 2a - b / 2) / M_w \quad (11)$$

**Table S1** The  $E_{\text{LUMO}}$ ,  $E_{\text{HOMO}}$ ,  $\mu$ ,  $N$  and  $\omega$  of the dienes

| Compd.     | $E_{\text{LUMO}}$<br>(eV) | $E_{\text{HOMO}}$<br>(eV) | $\mu$<br>(eV) | $N$<br>(eV) | $\omega$<br>(eV) | Compd.     | $E_{\text{LUMO}}$<br>(eV) | $E_{\text{HOMO}}$<br>(eV) | $\mu$<br>(eV) | $N$<br>(eV) | $\omega$ (eV) |
|------------|---------------------------|---------------------------|---------------|-------------|------------------|------------|---------------------------|---------------------------|---------------|-------------|---------------|
| <b>A0</b>  | -0.01                     | -6.85                     | -3.43         | 2.27        | 0.86             |            |                           |                           |               |             |               |
| <b>AA1</b> | 0.72                      | -5.69                     | -2.49         | 3.43        | 0.48             | <b>AN1</b> | -2.94                     | -7.94                     | -5.44         | 1.18        | 2.96          |
| <b>AA2</b> | 0.25                      | -5.6                      | -2.68         | 3.52        | 0.61             | <b>AN2</b> | -2.56                     | -7.99                     | -5.28         | 1.13        | 2.57          |
| <b>AA3</b> | 0.5                       | -5.59                     | -2.55         | 3.53        | 0.53             | <b>AN3</b> | -2.92                     | -8.07                     | -5.50         | 1.05        | 2.94          |
| <b>AA4</b> | 1.07                      | -4.97                     | -1.95         | 4.15        | 0.31             | <b>AN4</b> | -3.63                     | -8.84                     | -6.24         | 0.28        | 3.73          |
| <b>AA5</b> | 0.75                      | -5.51                     | -2.38         | 3.61        | 0.45             | <b>AN5</b> | -4.04                     | -8.94                     | -6.49         | 0.18        | 4.30          |
| <b>AA6</b> | 0.53                      | -5.4                      | -2.44         | 3.72        | 0.50             | <b>AN6</b> | -3.75                     | -8.45                     | -6.10         | 0.67        | 3.96          |
| <b>AA7</b> | 1.13                      | -4.76                     | -1.82         | 4.36        | 0.28             | <b>AN7</b> | -4.58                     | -9.04                     | -6.81         | 0.08        | 5.21          |
| <b>B0</b>  | -0.41                     | -7.3                      | -3.86         | 1.82        | 1.08             |            |                           |                           |               |             |               |
| <b>BA1</b> | 0.04                      | -6.35                     | -3.16         | 2.77        | 0.78             | <b>BN1</b> | -2.90                     | -8.34                     | -5.62         | 0.78        | 2.90          |
| <b>BA2</b> | -0.17                     | -5.96                     | -3.07         | 3.16        | 0.81             | <b>BN2</b> | -2.81                     | -8.44                     | -5.62         | 0.68        | 2.81          |
| <b>BA3</b> | 0.31                      | -5.95                     | -2.82         | 3.17        | 0.64             | <b>BN3</b> | -3.19                     | -8.46                     | -5.83         | 0.66        | 3.22          |
| <b>BA4</b> | 0.3                       | -5.86                     | -2.78         | 3.26        | 0.63             | <b>BN4</b> | -3.36                     | -8.84                     | -6.10         | 0.28        | 3.39          |
| <b>BA5</b> | 0.78                      | -5.69                     | -2.46         | 3.43        | 0.47             | <b>BN5</b> | -3.90                     | -9.08                     | -6.49         | 0.04        | 4.07          |
| <b>BA6</b> | 0.37                      | -5.69                     | -2.66         | 3.43        | 0.58             | <b>BN6</b> | -3.91                     | -8.78                     | -6.35         | 0.34        | 4.14          |
| <b>BA7</b> | 0.83                      | -5.54                     | -2.36         | 3.58        | 0.44             | <b>BN7</b> | -4.40                     | -9.14                     | -6.77         | -0.02       | 4.83          |
| <b>C0</b>  | -1.28                     | -7.82                     | -4.55         | 1.30        | 1.58             |            |                           |                           |               |             |               |
| <b>CA1</b> | -1.02                     | -6.31                     | -3.67         | 2.81        | 1.27             | <b>CN1</b> | -3.02                     | -8.71                     | -5.87         | 0.41        | 3.03          |
| <b>CA2</b> | -0.54                     | -6.38                     | -3.46         | 2.74        | 1.02             | <b>CN2</b> | -3.70                     | -8.87                     | -6.29         | 0.25        | 3.82          |
| <b>D0</b>  | -0.99                     | -8.37                     | -4.68         | 0.75        | 1.48             |            |                           |                           |               |             |               |
| <b>DA1</b> | -0.44                     | -6.68                     | -3.56         | 2.44        | 1.02             | <b>DN1</b> | -3.18                     | -8.64                     | -5.91         | 0.48        | 3.20          |
| <b>DA2</b> | -0.04                     | -6.77                     | -3.41         | 2.35        | 0.86             | <b>DN2</b> | -3.62                     | -8.91                     | -6.26         | 0.21        | 3.70          |
| <b>DA3</b> | 0.55                      | -6.06                     | -2.76         | 3.06        | 0.57             | <b>DN3</b> | -4.29                     | -9.21                     | -6.75         | -0.09       | 4.62          |
| <b>E0</b>  | -1.47                     | -8.8                      | -5.14         | 0.32        | 1.80             |            |                           |                           |               |             |               |
| <b>EA1</b> | -1.01                     | -6.87                     | -3.94         | 2.25        | 1.32             | <b>EN1</b> | -3.48                     | -8.94                     | -6.21         | 0.18        | 3.53          |
| <b>EA2</b> | -0.55                     | -6.45                     | -3.50         | 2.67        | 1.04             | <b>EN2</b> | -3.84                     | -9.25                     | -6.54         | -0.13       | 3.95          |
| <b>F0</b>  | -0.55                     | -7.9                      | -4.23         | 1.22        | 1.21             |            |                           |                           |               |             |               |
| <b>FA1</b> | 0.13                      | -6.56                     | -3.22         | 2.56        | 0.77             | <b>FN1</b> | -3.43                     | -8.79                     | -6.11         | 0.33        | 3.48          |
| <b>FA2</b> | 0.80                      | -5.73                     | -2.47         | 3.39        | 0.47             | <b>FN2</b> | -4.39                     | -9.44                     | -6.92         | -0.32       | 4.74          |

HOMO and LUMO are the highest occupied molecular orbital and lowest unoccupied molecular orbital, respectively;  $E_{\text{HOMO}}$  and  $E_{\text{LUMO}}$  are the energies of the HOMO and LUMO, respectively;  $\mu$ ,  $N$  and  $\omega$  are electronic chemical potential, global nucleophilicity index and global electrophilicity index, respectively.

**Table S2** Energy barrier for electron transfer between dienes and **FOX-7**

| <b>Compd.</b> | <b><math> \Delta E_1 </math> (eV)</b> | <b><math> \Delta E_2 </math> (eV)</b> | <b>Compd.</b> | <b><math> \Delta E_1 </math> (eV)</b> | <b><math> \Delta E_2 </math> (eV)</b> |
|---------------|---------------------------------------|---------------------------------------|---------------|---------------------------------------|---------------------------------------|
| <b>A0</b>     | 4.56                                  | 7.05                                  |               |                                       |                                       |
| <b>AA1</b>    | 3.40                                  | 7.78                                  | <b>AN1</b>    | 5.65                                  | 4.12                                  |
| <b>AA2</b>    | 3.31                                  | 7.31                                  | <b>AN2</b>    | 5.70                                  | 4.50                                  |
| <b>AA3</b>    | 3.30                                  | 7.56                                  | <b>AN3</b>    | 5.78                                  | 4.14                                  |
| <b>AA4</b>    | 2.68                                  | 8.13                                  | <b>AN4</b>    | 6.55                                  | 3.43                                  |
| <b>AA5</b>    | 3.22                                  | 7.81                                  | <b>AN5</b>    | 6.65                                  | 3.02                                  |
| <b>AA6</b>    | 3.11                                  | 7.59                                  | <b>AN6</b>    | 6.16                                  | 3.31                                  |
| <b>AA7</b>    | 2.47                                  | 8.19                                  | <b>AN7</b>    | 6.75                                  | 2.48                                  |
| <b>B0</b>     | 5.01                                  | 6.65                                  |               |                                       |                                       |
| <b>BA1</b>    | 4.06                                  | 7.10                                  | <b>BN1</b>    | 6.05                                  | 4.16                                  |
| <b>BA2</b>    | 3.67                                  | 6.89                                  | <b>BN2</b>    | 6.15                                  | 4.25                                  |
| <b>BA3</b>    | 3.66                                  | 7.37                                  | <b>BN3</b>    | 6.17                                  | 3.87                                  |
| <b>BA4</b>    | 3.57                                  | 7.36                                  | <b>BN4</b>    | 6.55                                  | 3.70                                  |
| <b>BA5</b>    | 3.40                                  | 7.84                                  | <b>BN5</b>    | 6.79                                  | 3.16                                  |
| <b>BA6</b>    | 3.40                                  | 7.43                                  | <b>BN6</b>    | 6.49                                  | 3.15                                  |
| <b>BA7</b>    | 3.25                                  | 7.89                                  | <b>BN7</b>    | 6.85                                  | 2.66                                  |
| <b>C0</b>     | 5.53                                  | 5.78                                  |               |                                       |                                       |
| <b>CA1</b>    | 4.02                                  | 6.04                                  | <b>CN1</b>    | 6.42                                  | 4.04                                  |
| <b>CA2</b>    | 4.09                                  | 6.52                                  | <b>CN2</b>    | 6.58                                  | 3.36                                  |
| <b>D0</b>     | 6.08                                  | 6.07                                  |               |                                       |                                       |
| <b>DA1</b>    | 4.39                                  | 6.62                                  | <b>DN1</b>    | 6.35                                  | 3.88                                  |
| <b>DA2</b>    | 4.48                                  | 7.02                                  | <b>DN2</b>    | 6.62                                  | 3.44                                  |
| <b>DA3</b>    | 3.77                                  | 7.61                                  | <b>DN3</b>    | 6.92                                  | 2.77                                  |
| <b>E0</b>     | 6.51                                  | 5.59                                  |               |                                       |                                       |
| <b>EA1</b>    | 4.58                                  | 6.05                                  | <b>EN1</b>    | 6.65                                  | 3.58                                  |
| <b>EA2</b>    | 4.16                                  | 6.51                                  | <b>EN2</b>    | 6.96                                  | 3.22                                  |
| <b>F0</b>     | 5.61                                  | 6.51                                  |               |                                       |                                       |
| <b>FA1</b>    | 4.27                                  | 7.19                                  | <b>FN1</b>    | 6.50                                  | 3.63                                  |
| <b>FA2</b>    | 3.44                                  | 7.86                                  | <b>FN2</b>    | 7.15                                  | 2.67                                  |

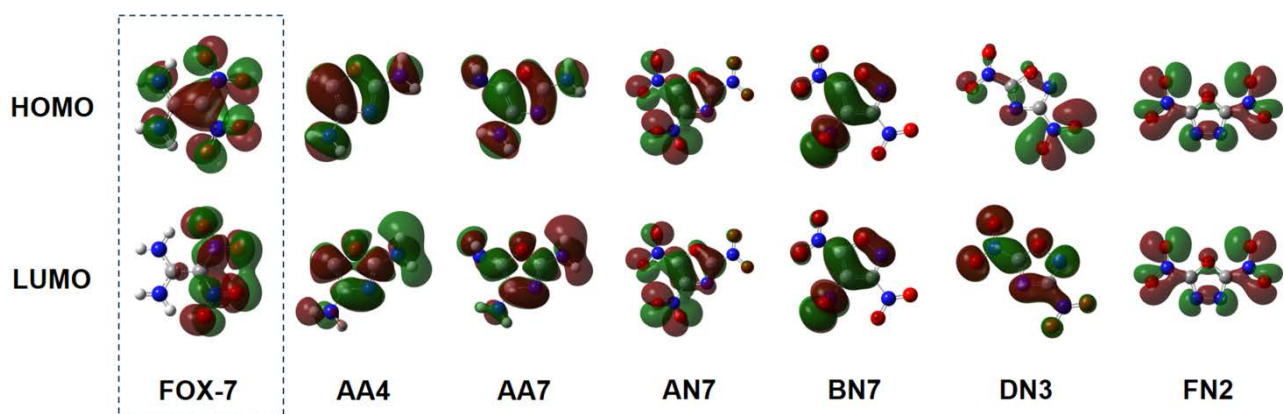

**Fig. S1** The HOMO and LUMO pictures

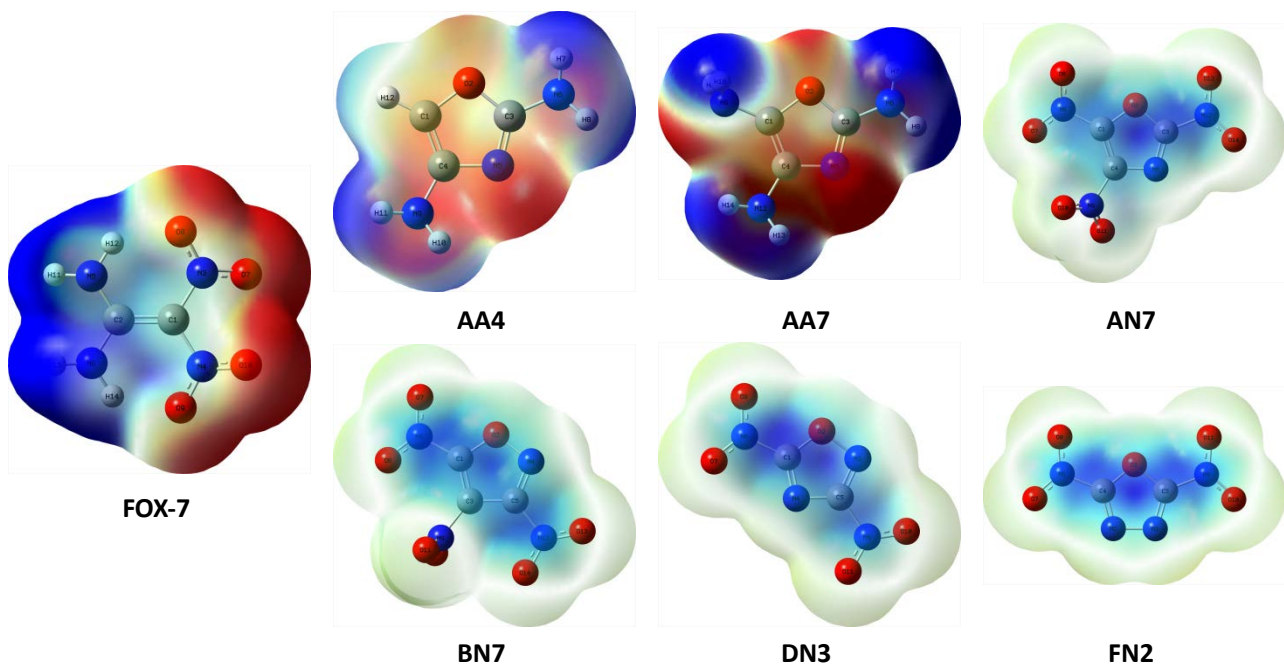

**Fig. S2** The molecular surface electrostatic potential maps of preferred dienes and FOX-7

**The Cartesian coordinates of transition states (TSs) and intermediate products (IMs):**

(1) The Cartesian coordinates of TSs and IMs for the reaction between **FOX-7** and **AA4**

**TS1** (for the formation of compound **P1-1**)

|   |             |             |             |
|---|-------------|-------------|-------------|
| O | -0.05885900 | -1.77121600 | 0.90794600  |
| C | 1.62065300  | -1.19245900 | -0.42665300 |
| N | 0.61588200  | -1.61237500 | -1.22841800 |
| N | -1.59633500 | -2.32266900 | -0.68554800 |
| H | -2.30204500 | -2.08140900 | 0.00616900  |
| H | -1.87249000 | -2.13666300 | -1.64163400 |
| N | 2.82838400  | -0.82686500 | -0.90469600 |
| H | 2.81308500  | -0.50628500 | -1.86621900 |
| H | 3.38605200  | -0.25560000 | -0.28215300 |
| N | -1.76861100 | 0.50092300  | 0.24932100  |
| N | -0.09597200 | 1.55696900  | -1.11410600 |
| N | 0.10585700  | 0.81667300  | 2.49861600  |
| N | 1.80467900  | 1.48462800  | 1.10725400  |
| O | -2.48413000 | 0.41949800  | -0.74107800 |
| O | -2.15089900 | 0.05220400  | 1.35075900  |
| O | 1.09489000  | 1.43331600  | -1.45698000 |
| O | -0.91005600 | 2.14673400  | -1.79070000 |
| H | 0.81815100  | 0.54057300  | 3.16286200  |
| H | -0.80160400 | 0.37843700  | 2.61867500  |
| H | 1.83232900  | 2.26472600  | 1.75780300  |
| H | 2.00934700  | 1.78568800  | 0.15970600  |
| C | -0.46347400 | 1.00817600  | 0.14873100  |
| C | 1.17785000  | -1.11686600 | 0.91244900  |
| H | 1.77028800  | -1.25616200 | 1.80515300  |
| C | -0.35699000 | -1.90478400 | -0.38291400 |
| C | 0.54898400  | 0.84617000  | 1.19223800  |

**IM** (for the formation of compound **P1-1**)

|   |             |             |             |
|---|-------------|-------------|-------------|
| O | -0.05973500 | 1.75598200  | 0.82604200  |
| C | -1.68673600 | 0.98369200  | -0.51885300 |
| N | -0.80693300 | 1.58534700  | -1.30723000 |
| N | 1.38783600  | 2.34028300  | -0.80511100 |
| H | 2.12674100  | 2.18014900  | -0.11977600 |
| H | 1.63894200  | 2.28161000  | -1.78366100 |
| N | -2.86855400 | 0.52915800  | -0.89108400 |
| H | -3.03190300 | 0.41142900  | -1.88424900 |
| H | -3.31884100 | -0.12718400 | -0.26099700 |
| N | 1.82136700  | -0.36898000 | 0.27416400  |
| N | 0.24231000  | -1.59560200 | -1.01298500 |
| N | -0.08656400 | -0.67824500 | 2.53992900  |



|   |             |             |             |
|---|-------------|-------------|-------------|
| N | -1.75276500 | -1.47222900 | 1.13807100  |
| O | 2.59308000  | -0.38890500 | -0.68409800 |
| O | 2.13027800  | 0.27080100  | 1.31167500  |
| O | -0.94408400 | -1.50324500 | -1.41115700 |
| O | 1.07388400  | -2.23797800 | -1.62032700 |
| H | -0.78289600 | -0.29712200 | 3.17627900  |
| H | 0.79173300  | -0.17258800 | 2.62433300  |
| H | -1.59480800 | -2.20286900 | 1.82927200  |
| H | -1.83169000 | -1.90902400 | 0.22250300  |
| C | 0.55088300  | -0.92862300 | 0.19242900  |
| C | -1.15799600 | 0.84648800  | 0.87731400  |
| H | -1.85351400 | 1.13164400  | 1.66619600  |
| C | 0.19224400  | 1.90132200  | -0.46672600 |
| C | -0.57306700 | -0.61078000 | 1.18296200  |

**TS2** (for the formation of compound **P1-1**)

|   |             |             |             |
|---|-------------|-------------|-------------|
| O | 0.44345100  | 1.72391600  | -0.79669900 |
| C | 2.03635500  | 0.63450000  | 0.35486500  |
| N | 1.25191000  | 1.13561800  | 1.25874300  |
| N | -0.81598800 | 2.30209100  | 1.05043700  |
| H | -1.64188300 | 2.45038600  | 0.47790300  |
| H | -1.01163100 | 2.12636500  | 2.02766400  |
| N | 3.21563000  | 0.04595200  | 0.58806800  |
| H | 3.46481800  | -0.16391700 | 1.54521300  |
| H | 3.68051200  | -0.45848400 | -0.15164000 |
| N | -1.94614100 | 0.12993400  | -0.23775400 |
| N | -0.57497600 | -1.40155700 | 1.01691500  |
| N | -0.20620700 | -0.70704300 | -2.42292300 |
| N | 1.27069200  | -1.77532200 | -1.02393100 |
| O | -2.73138500 | 0.10509100  | 0.69583000  |
| O | -2.16751600 | 0.74961200  | -1.27825800 |
| O | 0.46795200  | -1.50508900 | 1.65561500  |
| O | -1.50610500 | -2.17087400 | 1.10585100  |
| H | 0.51460500  | -0.78169000 | -3.13659300 |
| H | -0.80949000 | 0.08808800  | -2.60438100 |
| H | 0.73453600  | -2.58186700 | -1.33925700 |
| H | 1.56911300  | -1.94028500 | -0.06575100 |
| C | -0.60132200 | -0.32764600 | 0.00968500  |
| C | 1.36357400  | 0.67011000  | -0.99987200 |
| H | 1.98166200  | 0.82825800  | -1.88267400 |
| C | 0.12057000  | 1.47810100  | 0.51640100  |
| C | 0.43118000  | -0.60436800 | -1.13709400 |

**TS1** (for the formation of compound **P1-2**)

|   |             |             |             |
|---|-------------|-------------|-------------|
| O | 1.23524900  | -0.31370800 | -1.46897600 |
| C | 0.80024600  | 1.73348200  | -0.70807300 |
| N | 1.73342200  | 1.25654700  | 0.08069100  |
| N | 2.96527700  | -0.85176400 | 0.05629000  |
| H | 3.79980400  | -0.37945500 | -0.28510900 |
| H | 3.03255800  | -0.90062000 | 1.07487300  |
| N | 0.32482500  | 3.01254500  | -0.68544100 |
| H | 0.38567500  | 3.44009800  | 0.23149700  |
| H | -0.58004600 | 3.15045600  | -1.11648100 |
| N | -1.58684500 | -0.96361600 | -0.84678200 |
| N | -1.50980300 | 0.57066300  | 1.01908600  |
| N | 0.58610600  | -2.34169300 | 0.63165800  |
| N | 0.85098600  | -0.58709900 | 2.09120000  |
| O | -2.56242700 | -0.35166700 | -1.24496300 |
| O | -1.19718200 | -2.01439500 | -1.34432300 |
| O | -0.89302900 | 1.52267100  | 1.49182000  |
| O | -2.66119200 | 0.30735100  | 1.28474000  |
| H | 1.55182900  | -2.59978800 | 0.81160000  |
| H | 0.27979200  | -2.68413700 | -0.27053500 |
| H | 0.34610200  | -1.13634100 | 2.78318600  |
| H | 0.74720000  | 0.40793600  | 2.26609600  |
| C | -0.75212000 | -0.32897600 | 0.15374600  |
| C | 0.34585100  | 0.66406600  | -1.54945300 |
| H | -0.35234900 | 0.65357900  | -2.37822600 |
| C | 1.82290700  | -0.08405200 | -0.22142200 |
| C | 0.42816800  | -0.95499000 | 0.77683600  |

**TS1** (for the formation of compound **P1-3**)

|   |             |             |             |
|---|-------------|-------------|-------------|
| O | -1.21273500 | -0.28128000 | -1.49841900 |
| C | -0.74020000 | 1.72574000  | -0.67892900 |
| N | -1.72533400 | 1.27158000  | 0.06717100  |
| N | -3.04550900 | -0.72657300 | -0.09073800 |
| H | -2.88439100 | -1.69266400 | 0.19199400  |
| H | -3.68880000 | -0.22063500 | 0.50324300  |
| N | -0.19711500 | 2.97221200  | -0.56946100 |
| H | -0.34962000 | 3.40475700  | 0.33425700  |
| H | 0.75435700  | 3.07090100  | -0.90106000 |
| N | 1.38164600  | 0.83499000  | 0.74444100  |
| N | 1.67000300  | -1.19234900 | -0.51662000 |
| N | -0.74283800 | -0.77132300 | 2.14299400  |
| N | -0.75837600 | -2.30505900 | 0.42205800  |
| O | 2.30082600  | 1.32321600  | 0.10705300  |
| O | 0.90150400  | 1.35108100  | 1.74540500  |

|   |             |             |             |
|---|-------------|-------------|-------------|
| O | 1.25274600  | -1.78861800 | -1.50251900 |
| O | 2.78096900  | -1.31743300 | -0.04994000 |
| H | -1.71220300 | -1.03366200 | 2.30584600  |
| H | -0.57054300 | 0.17975800  | 2.44730100  |
| H | -0.34474000 | -2.95092200 | 1.09174600  |
| H | -0.46847400 | -2.53463700 | -0.52457100 |
| C | 0.71927000  | -0.32020700 | 0.17912500  |
| C | -0.25473100 | 0.64505800  | -1.49303500 |
| H | 0.48887800  | 0.61794100  | -2.27836300 |
| C | -1.86376800 | -0.04266800 | -0.28459800 |
| C | -0.44195200 | -0.96140800 | 0.78044500  |

**TS1** (for the formation of compound **P1-4**)

|   |             |             |             |
|---|-------------|-------------|-------------|
| O | -0.29115800 | -1.01598300 | 1.64831200  |
| C | -1.94107600 | -0.76706600 | 0.17978900  |
| N | -1.14703200 | -1.74757500 | -0.29506000 |
| N | 0.93593400  | -2.57140700 | 0.50748800  |
| H | 1.73999100  | -2.22577700 | 1.02279100  |
| H | 1.12334800  | -2.95079500 | -0.41212600 |
| N | -3.08636600 | -0.41434300 | -0.44139600 |
| H | -3.09630800 | -0.60738300 | -1.43653500 |
| H | -3.49656400 | 0.47071400  | -0.17941200 |
| N | 0.23631000  | 0.36830500  | -1.65215900 |
| N | 1.99577200  | 0.36500700  | -0.01579400 |
| N | -1.09697600 | 2.36537100  | 0.09614300  |
| N | 0.25712600  | 1.81281500  | 1.85333400  |
| O | 0.88140500  | -0.40459000 | -2.33624700 |
| O | -0.88215300 | 0.78911000  | -2.01124100 |
| O | 2.23754700  | 0.08779400  | 1.17705500  |
| O | 2.85676600  | 0.31306600  | -0.87228100 |
| H | -1.72941500 | 2.74014200  | 0.79093500  |
| H | -1.46129000 | 2.18528600  | -0.83065100 |
| H | 0.59324300  | 2.77128800  | 1.79641800  |
| H | 1.00246200  | 1.19652800  | 2.16690400  |
| C | 0.67538500  | 0.75216200  | -0.36665100 |
| C | -1.34086600 | -0.15043400 | 1.30699400  |
| H | -1.83245100 | 0.31614000  | 2.14849700  |
| C | -0.15807300 | -1.80073000 | 0.58320800  |
| C | -0.22297900 | 1.41631200  | 0.58341300  |

**IM** (for the formation of compound **P1-4**)

|   |             |            |             |
|---|-------------|------------|-------------|
| O | -0.04965800 | 1.76923900 | -0.81132400 |
| C | -1.67368100 | 0.99022700 | 0.53064100  |
| N | -0.78531000 | 1.57017000 | 1.32028100  |

|   |             |             |             |
|---|-------------|-------------|-------------|
| N | 1.41750400  | 2.30353500  | 0.82321100  |
| H | 2.15242600  | 2.12435900  | 0.13555800  |
| H | 1.66556700  | 2.22768900  | 1.80155100  |
| N | -2.87627800 | 0.59753400  | 0.92375200  |
| H | -3.01780200 | 0.49118100  | 1.92194900  |
| H | -3.38718500 | -0.04036000 | 0.32857500  |
| N | 0.14323500  | -1.63776000 | 0.96609400  |
| N | 1.81758500  | -0.39595500 | -0.18465800 |
| N | -1.54106000 | -1.59012400 | -1.32888600 |
| N | -0.05248500 | -0.39180100 | -2.59202600 |
| O | 0.91666600  | -2.32028900 | 1.60366100  |
| O | -1.06400300 | -1.52494500 | 1.28664900  |
| O | 2.19083900  | 0.29581400  | -1.17055700 |
| O | 2.54397400  | -0.48799600 | 0.80424100  |
| H | -2.19061300 | -1.37377200 | -2.07724400 |
| H | -1.97653600 | -1.83549500 | -0.44929900 |
| H | 0.20349900  | -1.32168900 | -2.92380200 |
| H | 0.80921900  | 0.15084100  | -2.55962500 |
| C | 0.53901600  | -0.93327200 | -0.19383300 |
| C | -1.15265500 | 0.85809900  | -0.87184000 |
| H | -1.83354800 | 1.15579900  | -1.66910000 |
| C | 0.21633300  | 1.88711800  | 0.48037200  |
| C | -0.52733200 | -0.57256000 | -1.22939000 |

**TS2** (for the formation of compound **P1-4**)

|   |             |             |             |
|---|-------------|-------------|-------------|
| O | -0.52113600 | -0.14939700 | 1.90086100  |
| C | -2.07073500 | -0.39893800 | 0.29134600  |
| N | -1.40366900 | -1.51993400 | 0.30960600  |
| N | 0.59189900  | -2.13155000 | 1.45848000  |
| H | 1.45741000  | -1.74711100 | 1.82765600  |
| H | 0.70289600  | -2.88801200 | 0.79359300  |
| N | -3.19973500 | -0.18905300 | -0.38854300 |
| H | -3.45581600 | -0.86409900 | -1.09740700 |
| H | -3.58559900 | 0.73928400  | -0.46052300 |
| N | 0.37591800  | -0.53924600 | -1.55874200 |
| N | 2.02845700  | 0.21789100  | -0.00351800 |
| N | -0.75881400 | 2.13788100  | -0.97739100 |
| N | 0.42657700  | 2.29432600  | 0.98338200  |
| O | 1.11820700  | -1.46009700 | -1.86102500 |
| O | -0.66779800 | -0.28419700 | -2.16711100 |
| O | 2.30723300  | 0.18127500  | 1.20041600  |
| O | 2.85690200  | 0.33180200  | -0.88012400 |
| H | -1.31206300 | 2.90895900  | -0.61739300 |
| H | -1.23645900 | 1.58769400  | -1.68012900 |

|   |             |             |             |
|---|-------------|-------------|-------------|
| H | 1.11227600  | 2.80899100  | 0.43261500  |
| H | 0.91803200  | 1.80428500  | 1.72758400  |
| C | 0.61593000  | 0.14759000  | -0.33154200 |
| C | -1.32551400 | 0.66206100  | 1.05729900  |
| H | -1.88726600 | 1.40077000  | 1.62702800  |
| C | -0.29181500 | -1.19810800 | 1.06512400  |
| C | -0.24205000 | 1.35438700  | 0.10776000  |

(2) The Cartesian coordinates of TSs and IMs for the reaction between **FOX-7** and **AA7**

**TS1** (for the formation of compound **P2-1**)

|   |             |             |             |
|---|-------------|-------------|-------------|
| C | -1.40851400 | 0.19016700  | 0.78582000  |
| O | -0.35126200 | 0.82719900  | 1.51380700  |
| C | 0.05435100  | 1.81480900  | 0.72477600  |
| C | -1.64953600 | 1.11047500  | -0.27471900 |
| N | -0.70700800 | 2.07074400  | -0.32757300 |
| N | 1.17513100  | 2.47243900  | 1.05788800  |
| H | 1.55980200  | 3.02824300  | 0.30406600  |
| H | 1.86306600  | 1.91660700  | 1.56017300  |
| N | -2.42187900 | -0.43148400 | 1.50979500  |
| H | -2.04709500 | -1.14999000 | 2.12297500  |
| H | -2.97546600 | 0.21802200  | 2.06449600  |
| N | -2.65093300 | 1.01203500  | -1.15992900 |
| H | -2.51529000 | 1.49812600  | -2.03755900 |
| H | -3.09788400 | 0.10313100  | -1.20348000 |
| N | 1.74773100  | -0.72498400 | 0.70214900  |
| N | 1.21993500  | -0.18830300 | -1.59185300 |
| N | -0.62303000 | -2.46472600 | 0.68835600  |
| N | -1.34986900 | -1.61146100 | -1.28647800 |
| O | 2.67436600  | 0.08263000  | 0.67834300  |
| O | 1.51596900  | -1.40106600 | 1.71864100  |
| O | 0.29512800  | 0.13081400  | -2.36519100 |
| O | 2.38611600  | 0.02435000  | -1.86185000 |
| H | -0.00085000 | -2.45275400 | 1.48723500  |
| H | -1.58779300 | -2.73390800 | 0.83608000  |
| H | -1.43052400 | -2.60219600 | -1.49208800 |
| H | -1.05472500 | -1.08133400 | -2.10084700 |
| C | 0.87124000  | -0.85517400 | -0.38998300 |
| C | -0.46859400 | -1.42614200 | -0.20548300 |

**IM** (for the formation of compound **P2-1**)

|   |             |             |             |
|---|-------------|-------------|-------------|
| C | -1.28800300 | 0.10296000  | -0.68769200 |
| O | -0.29124900 | -0.54439400 | -1.55205500 |
| C | 0.00598100  | -1.68333700 | -0.95425600 |
| C | -1.64062100 | -1.08091900 | 0.18129700  |

|   |             |             |             |
|---|-------------|-------------|-------------|
| N | -0.84620400 | -2.12046500 | -0.01390000 |
| N | 1.10770900  | -2.31230500 | -1.31792300 |
| H | 1.39175200  | -3.08798100 | -0.73291100 |
| H | 1.85158400  | -1.73554000 | -1.70956000 |
| N | -2.39261000 | 0.61406700  | -1.39006700 |
| H | -2.10452200 | 1.36617300  | -2.00889800 |
| H | -2.87431600 | -0.09968900 | -1.92971500 |
| N | -2.65410500 | -1.02541500 | 1.01689200  |
| H | -2.75239600 | -1.75547000 | 1.71147900  |
| H | -3.01775100 | -0.09373000 | 1.20911100  |
| N | 1.85118200  | 0.70345500  | -0.52692800 |
| N | 1.12006700  | 0.00314800  | 1.63361700  |
| N | -0.49459000 | 2.51505000  | -0.55885100 |
| N | -1.38860300 | 1.53810300  | 1.30862900  |
| O | 2.77707100  | -0.11614000 | -0.47477900 |
| O | 1.70136200  | 1.41678400  | -1.53450800 |
| O | 0.11184000  | -0.45343500 | 2.23122600  |
| O | 2.24721900  | -0.19037800 | 2.05125500  |
| H | 0.12153600  | 2.49330000  | -1.36322300 |
| H | -1.43704900 | 2.83687000  | -0.75584700 |
| H | -1.23826700 | 2.51580500  | 1.54696200  |
| H | -1.08811800 | 0.97046500  | 2.09844100  |
| C | 0.88677600  | 0.77023700  | 0.48146200  |
| C | -0.52118500 | 1.27119900  | 0.16331800  |

**TS2** (for the formation of compound **P2-1**)

|   |             |             |             |
|---|-------------|-------------|-------------|
| C | 1.51086700  | -0.53662600 | 0.40177600  |
| O | 0.71648300  | -1.68800300 | 0.03975000  |
| C | 0.08482300  | -1.19468900 | -1.06070000 |
| C | 1.80679900  | -0.00951800 | -0.98830600 |
| N | 0.92644100  | -0.40987900 | -1.85214800 |
| N | -0.82764200 | -2.00889500 | -1.64015900 |
| H | -1.28016700 | -1.61324800 | -2.45457700 |
| H | -1.45102400 | -2.48881000 | -0.99695100 |
| N | 2.62224600  | -0.75283400 | 1.22710800  |
| H | 2.30241200  | -0.80103900 | 2.19524200  |
| H | 3.12324700  | -1.59724600 | 0.96800800  |
| N | 2.80312100  | 0.85585600  | -1.17452800 |
| H | 2.97215800  | 1.25552800  | -2.08614200 |
| H | 3.47489500  | 0.97174500  | -0.42660500 |
| N | -1.96509900 | -0.53361500 | 0.40118200  |
| N | -1.17014300 | 1.54043400  | -0.46273000 |
| N | 0.22294200  | -0.13461700 | 2.42673400  |
| N | 0.93843700  | 1.73034900  | 1.22057300  |

|   |             |             |             |
|---|-------------|-------------|-------------|
| O | -2.94105700 | -0.38597900 | -0.32044300 |
| O | -1.86483700 | -1.47386100 | 1.19956800  |
| O | -0.42258200 | 1.99752600  | -1.31349600 |
| O | -2.11042600 | 2.14149000  | 0.02010800  |
| H | -0.49449600 | -0.85536200 | 2.42885000  |
| H | -0.03634600 | 0.61196600  | 3.06405700  |
| H | 0.22913100  | 2.34677500  | 1.61627300  |
| H | 1.19309300  | 2.11426600  | 0.31337800  |
| C | -0.80082500 | 0.23531200  | 0.11223400  |
| C | 0.41405800  | 0.39193100  | 1.09372400  |

**TS1** (for the formation of compound **P2-2**)

|   |             |             |             |
|---|-------------|-------------|-------------|
| C | -0.08335300 | -1.76340800 | -0.41683400 |
| O | -1.17118000 | -1.23006400 | -0.91530600 |
| C | -1.75898800 | -0.52818400 | 0.17123600  |
| C | -0.12759600 | -1.63057700 | 1.00565100  |
| N | -1.19892600 | -0.94009800 | 1.33340600  |
| N | -3.12519000 | -0.33381000 | 0.02140500  |
| H | -3.50536800 | -0.02141000 | 0.90955400  |
| H | -3.26501000 | 0.39642000  | -0.68169800 |
| N | 0.84836900  | -2.31513000 | -1.20269300 |
| H | 0.86240300  | -1.95506800 | -2.15651500 |
| H | 1.76820100  | -2.35520900 | -0.77027600 |
| N | 0.92911000  | -1.99957900 | 1.82885400  |
| H | 0.92691700  | -1.44994900 | 2.68312900  |
| H | 0.97235600  | -2.99379200 | 2.03042500  |
| N | 1.23459800  | 0.47420900  | -1.32568700 |
| N | 1.37533200  | 1.12591300  | 0.98279900  |
| N | -1.52254600 | 1.63128900  | -1.31860700 |
| N | -1.41634700 | 1.93409500  | 0.96991500  |
| O | 2.38423600  | 0.05246900  | -1.25803700 |
| O | 0.58298700  | 0.40031700  | -2.39003100 |
| O | 0.86179400  | 0.91040000  | 2.08727900  |
| O | 2.50197500  | 1.55519000  | 0.84913200  |
| H | -0.97580500 | 1.52399500  | -2.16479400 |
| H | -2.02134100 | 2.50649900  | -1.21840500 |
| H | -1.16747900 | 2.92196700  | 0.92055500  |
| H | -1.04476100 | 1.55180000  | 1.83562900  |
| C | 0.55725100  | 0.90947000  | -0.18103800 |
| C | -0.87054600 | 1.23437000  | -0.14529000 |

**IM** (for the formation of compound **P2-2**)

|   |            |            |             |
|---|------------|------------|-------------|
| C | 0.16281800 | 1.67445600 | -0.57126100 |
| O | 1.14019700 | 1.07264400 | -1.12803100 |

|   |             |             |             |
|---|-------------|-------------|-------------|
| C | 1.74502500  | 0.21946100  | 0.03709400  |
| C | 0.37112200  | 1.68014000  | 0.90161900  |
| N | 1.36726100  | 0.92879400  | 1.20122800  |
| N | 3.09334300  | 0.04296500  | -0.16962300 |
| H | 3.65066200  | 0.29733300  | 0.63433400  |
| H | 3.28326600  | -0.88977800 | -0.52843800 |
| N | -0.82865300 | 2.22643700  | -1.24608600 |
| H | -0.96217100 | 1.84783300  | -2.18697000 |
| H | -1.69111600 | 2.38450600  | -0.73286800 |
| N | -0.49317500 | 2.29136200  | 1.74885800  |
| H | -0.36416900 | 2.06786200  | 2.72791400  |
| H | -0.78720100 | 3.23797300  | 1.54961000  |
| N | -1.37989900 | -0.46361900 | -1.19580200 |
| N | -1.36684100 | -0.99222700 | 1.12757700  |
| N | 1.36226500  | -1.76967400 | -1.32381200 |
| N | 1.33427800  | -1.95271100 | 0.99648800  |
| O | -2.53273800 | -0.03755500 | -1.06973600 |
| O | -0.81641100 | -0.42163900 | -2.31854200 |
| O | -0.80424800 | -0.66962900 | 2.18242100  |
| O | -2.47755300 | -1.48452300 | 1.09776200  |
| H | 0.83352000  | -1.42047100 | -2.12056100 |
| H | 1.22228000  | -2.77489200 | -1.25858300 |
| H | 0.86068200  | -2.85489400 | 0.96709400  |
| H | 1.06647500  | -1.50860300 | 1.87203500  |
| C | -0.62321600 | -0.80828700 | -0.08900000 |
| C | 0.87654400  | -1.13919500 | -0.11284500 |

**TS2** (for the formation of compound **P2-2**)

|   |             |             |             |
|---|-------------|-------------|-------------|
| C | 0.29957700  | 1.28069200  | -0.90863700 |
| O | 1.18336800  | 0.45987400  | -1.40312100 |
| C | 1.77491600  | -0.13249800 | -0.14773800 |
| C | 0.81895400  | 1.74107600  | 0.40777200  |
| N | 1.73791600  | 0.93571300  | 0.80611800  |
| N | 3.02640500  | -0.67402100 | -0.39563300 |
| H | 3.71428100  | -0.34693600 | 0.26962700  |
| H | 2.97051700  | -1.68829900 | -0.44998500 |
| N | -0.57855600 | 1.91255300  | -1.70369400 |
| H | -0.84459300 | 1.37230100  | -2.52775500 |
| H | -1.37833500 | 2.31635500  | -1.22507400 |
| N | 0.28171500  | 2.79723600  | 1.05990300  |
| H | 0.64014200  | 2.97112900  | 1.98959800  |
| H | 0.04092900  | 3.61819100  | 0.52176600  |
| N | -1.57289500 | -0.51192900 | -1.00422900 |
| N | -1.40911000 | -0.31379900 | 1.36538700  |



|   |             |             |             |
|---|-------------|-------------|-------------|
| N | 0.83375800  | -2.32457900 | -0.71387300 |
| N | 0.96825400  | -1.69356000 | 1.52899100  |
| O | -2.65139500 | 0.07380000  | -0.92373900 |
| O | -1.14172300 | -0.93798100 | -2.08832400 |
| O | -0.87667200 | 0.38207500  | 2.22060600  |
| O | -2.42656400 | -0.95344900 | 1.54310300  |
| H | 0.34518200  | -2.14408500 | -1.58727500 |
| H | 0.47145700  | -3.18094800 | -0.30340500 |
| H | 0.25571600  | -2.34256700 | 1.86026400  |
| H | 1.00333100  | -0.91114500 | 2.17812100  |
| C | -0.69545100 | -0.45894600 | 0.09395400  |
| C | 0.64747900  | -1.22229600 | 0.20216600  |

**TS1** (for the formation of compound **P2-3**)

|   |             |             |             |
|---|-------------|-------------|-------------|
| C | -1.06133500 | -0.89200700 | 0.72503600  |
| C | -1.65321700 | 0.61308300  | -0.47941500 |
| C | 0.28766200  | 0.93946900  | -1.40490600 |
| C | 0.39820600  | -0.84122500 | 0.60358100  |
| C | 0.06481200  | 1.90181300  | -0.35875600 |
| O | -0.83175500 | 0.29660900  | -1.61000600 |
| N | -1.13720900 | 1.71228100  | 0.13220400  |
| N | 0.98343500  | 2.82544000  | 0.09143800  |
| H | 1.89489700  | 2.40172800  | 0.27405700  |
| H | 0.64576400  | 3.25341500  | 0.94904500  |
| N | -3.00763900 | 0.45994300  | -0.70645200 |
| H | -3.32619200 | -0.48431000 | -0.49052800 |
| H | -3.56244100 | 1.19640900  | -0.29213000 |
| N | -1.62471800 | -0.62434700 | 1.97708600  |
| H | -2.61813900 | -0.43422800 | 1.87981600  |
| H | -1.14113700 | 0.11880100  | 2.46889300  |
| N | -1.79855300 | -1.93215600 | 0.10709400  |
| H | -1.33695400 | -2.29132600 | -0.72317800 |
| H | -1.98097000 | -2.66992800 | 0.78279600  |
| N | 1.10177100  | -1.70837700 | -0.28395100 |
| O | 0.51326300  | -2.09316800 | -1.30946900 |
| O | 2.23843600  | -2.04760000 | -0.02105400 |
| N | 1.20569800  | 0.08545800  | 1.29225400  |
| O | 0.72435900  | 0.68279500  | 2.26121600  |
| O | 2.33011700  | 0.36765700  | 0.85738200  |
| N | 1.38715700  | 0.65235200  | -2.11447600 |
| H | 2.27139000  | 0.89251100  | -1.67788600 |
| H | 1.37205400  | -0.25438400 | -2.57506300 |

**IM** (for the formation of compound **P2-3**)

|   |             |             |             |
|---|-------------|-------------|-------------|
| C | -0.87654000 | -1.13919800 | -0.11284000 |
| C | -1.74502600 | 0.21945500  | 0.03709000  |
| C | -0.16282200 | 1.67445100  | -0.57126900 |
| C | 0.62321800  | -0.80828200 | -0.08899600 |
| C | -0.37113000 | 1.68014400  | 0.90161000  |
| O | -1.14019900 | 1.07263400  | -1.12803800 |
| N | -1.36726700 | 0.92879600  | 1.20122100  |
| N | 0.49316300  | 2.29137500  | 1.74884800  |
| H | 0.36415300  | 2.06788200  | 2.72790500  |
| H | 0.78718600  | 3.23798500  | 1.54959400  |
| N | -3.09334300 | 0.04295300  | -0.16962800 |
| H | -3.65066400 | 0.29732300  | 0.63432600  |
| H | -3.28326200 | -0.88979200 | -0.52843900 |
| N | -1.33427100 | -1.95271000 | 0.99649800  |
| H | -1.06647200 | -1.50859400 | 1.87204300  |
| H | -0.86067000 | -2.85489000 | 0.96711000  |
| N | -1.36225600 | -1.76968600 | -1.32380400 |
| H | -0.83351300 | -1.42048500 | -2.12055400 |
| H | -1.22226700 | -2.77490300 | -1.25856800 |
| N | 1.37990300  | -0.46362100 | -1.19579900 |
| O | 0.81641700  | -0.42164800 | -2.31854000 |
| O | 2.53274100  | -0.03755400 | -1.06973300 |
| N | 1.36684300  | -0.99221600 | 1.12758300  |
| O | 0.80425100  | -0.66961000 | 2.18242500  |
| O | 2.47755300  | -1.48451500 | 1.09777100  |
| N | 0.82864800  | 2.22643300  | -1.24609500 |
| H | 1.69111000  | 2.38450700  | -0.73287800 |
| H | 0.96216800  | 1.84782600  | -2.18697800 |

**TS2** (for the formation of compound **P2-3**)

|   |             |             |             |
|---|-------------|-------------|-------------|
| C | -0.64743700 | -1.22232800 | 0.20214600  |
| C | -1.77491400 | -0.13259700 | -0.14768300 |
| C | -0.29965600 | 1.28074300  | -0.90858800 |
| C | 0.69548700  | -0.45895000 | 0.09395600  |
| C | -0.81903000 | 1.74102900  | 0.40785800  |
| O | -1.18339300 | 0.45989500  | -1.40309600 |
| N | -1.73794200 | 0.93560200  | 0.80618500  |
| N | -0.28185300 | 2.79720200  | 1.06002400  |
| H | -0.64034300 | 2.97105200  | 1.98970400  |
| H | -0.04119300 | 3.61820000  | 0.52189500  |
| N | -3.02634100 | -0.67421200 | -0.39558500 |
| H | -3.71443100 | -0.34671800 | 0.26924800  |
| H | -2.97051500 | -1.68851700 | -0.44944300 |

|   |             |             |             |
|---|-------------|-------------|-------------|
| N | -0.96819300 | -1.69368400 | 1.52893900  |
| H | -1.00292600 | -0.91136200 | 2.17820000  |
| H | -0.25585600 | -2.34300600 | 1.86002000  |
| N | -0.83371200 | -2.32455800 | -0.71396900 |
| H | -0.34598300 | -2.14340300 | -1.58771300 |
| H | -0.47011100 | -3.18068600 | -0.30411800 |
| N | 1.57288100  | -0.51182900 | -1.00427200 |
| O | 1.14168900  | -0.93781100 | -2.08838600 |
| O | 2.65138200  | 0.07390200  | -0.92378600 |
| N | 1.40917600  | -0.31382600 | 1.36536600  |
| O | 0.87667300  | 0.38191400  | 2.22066200  |
| O | 2.42672800  | -0.95334200 | 1.54299800  |
| N | 0.57845700  | 1.91267600  | -1.70360100 |
| H | 1.37822300  | 2.31649500  | -1.22497200 |
| H | 0.84449500  | 1.37250400  | -2.52771500 |

**TS1** (for the formation of compound **P2-4**)

|   |             |             |             |
|---|-------------|-------------|-------------|
| C | -1.55396000 | 0.42008700  | 0.65005200  |
| O | -0.57220700 | 0.56856100  | 1.68190200  |
| C | -0.00478000 | -0.62733300 | 1.75191500  |
| C | -1.64485000 | -0.98578900 | 0.49486800  |
| N | -0.63947000 | -1.61427800 | 1.13143300  |
| N | 1.14495400  | -0.74619300 | 2.43442700  |
| H | 1.68177200  | 0.11143600  | 2.52198100  |
| H | 1.67547400  | -1.58129200 | 2.21639000  |
| N | -2.62146200 | 1.29706000  | 0.55297500  |
| H | -3.24851000 | 1.28842600  | 1.35314600  |
| H | -2.27626700 | 2.24005100  | 0.36530400  |
| N | -2.56813600 | -1.62595000 | -0.24552000 |
| H | -2.27234100 | -2.50133400 | -0.65997800 |
| H | -3.17842000 | -1.04310000 | -0.80183800 |
| N | 0.91610600  | -1.11998100 | -1.18302500 |
| N | 2.01776800  | 0.74263900  | -0.13907200 |
| N | -1.13150500 | 0.86060000  | -2.08611000 |
| N | -0.35246100 | 2.39509100  | -0.57982600 |
| O | 1.80319700  | -1.85352500 | -0.78829100 |
| O | -0.03372000 | -1.54520600 | -1.86700700 |
| O | 1.86583400  | 1.64200900  | 0.71602800  |
| O | 3.11689500  | 0.29572200  | -0.40389600 |
| H | -1.13350500 | -0.09470200 | -2.42492400 |
| H | -2.05059000 | 1.27731800  | -1.97311100 |
| H | -0.29350200 | 2.98514300  | -1.40420300 |
| H | 0.37898200  | 2.60109400  | 0.09633300  |
| C | 0.86963700  | 0.24266100  | -0.80248600 |

|   |             |            |             |
|---|-------------|------------|-------------|
| C | -0.34665600 | 1.03929800 | -0.96034100 |
|---|-------------|------------|-------------|

**IM** (for the formation of compound **P2-4**)

|   |             |             |             |
|---|-------------|-------------|-------------|
| C | -1.40817000 | 0.62322000  | 0.15195800  |
| O | -0.61725100 | 1.15404800  | 1.27703100  |
| C | -0.16596700 | 0.07778500  | 1.88797000  |
| C | -1.66305800 | -0.75949100 | 0.69481300  |
| N | -0.85384800 | -1.06492700 | 1.69311900  |
| N | 0.89553400  | 0.19785200  | 2.66211300  |
| H | 1.50346500  | 0.98879300  | 2.45495500  |
| H | 1.31201700  | -0.65670800 | 3.00902900  |
| N | -2.56577100 | 1.34129600  | -0.16958900 |
| H | -3.18083700 | 1.49154100  | 0.62431900  |
| H | -2.28829900 | 2.22388400  | -0.60197900 |
| N | -2.64174600 | -1.51587600 | 0.23339200  |
| H | -2.61970100 | -2.50639600 | 0.44326700  |
| H | -3.09662800 | -1.21759800 | -0.62016100 |
| N | 0.92941800  | -1.47918700 | -0.75335800 |
| N | 2.07144900  | 0.55914600  | -0.25280000 |
| N | -0.93609200 | 0.19210300  | -2.31595900 |
| N | -0.20021000 | 2.10945600  | -1.28964500 |
| O | 1.89890900  | -2.14254600 | -0.42323000 |
| O | -0.16323600 | -2.03184300 | -1.04870000 |
| O | 1.93074900  | 1.65730200  | 0.34903600  |
| O | 3.17314300  | 0.05912300  | -0.39183600 |
| H | -1.00790100 | -0.81982300 | -2.30747700 |
| H | -1.84190200 | 0.63021900  | -2.46086300 |
| H | 0.19616000  | 2.22543500  | -2.21982700 |
| H | 0.45938700  | 2.47946300  | -0.60699500 |
| C | 0.91436300  | -0.08344900 | -0.72622300 |
| C | -0.36140400 | 0.67751500  | -1.08578200 |

**TS2** (for the formation of compound **P2-4**)

|   |             |             |            |
|---|-------------|-------------|------------|
| C | -1.51149500 | 0.59227300  | 0.37076800 |
| O | -0.71047900 | 0.68856500  | 1.57895300 |
| C | -0.06708100 | -0.50222600 | 1.52033300 |
| C | -1.77064400 | -0.89537200 | 0.36170000 |
| N | -0.87896700 | -1.53505400 | 1.06410100 |
| N | 0.90525400  | -0.74091300 | 2.42545100 |
| H | 1.54265300  | 0.03923500  | 2.55356000 |
| H | 1.35622000  | -1.63939200 | 2.29092500 |
| N | -2.62961400 | 1.42442900  | 0.27119600 |
| H | -3.22531500 | 1.38093700  | 1.09100800 |
| H | -2.35344300 | 2.37880500  | 0.05541000 |

|   |             |             |             |
|---|-------------|-------------|-------------|
| N | -2.75679100 | -1.40879800 | -0.36921800 |
| H | -2.70717400 | -2.39106600 | -0.60603200 |
| H | -3.17333600 | -0.77587300 | -1.04289800 |
| N | 1.04054300  | -1.27653500 | -0.87047600 |
| N | 2.01522200  | 0.73870600  | -0.07046200 |
| N | -1.00004700 | 0.60989000  | -2.06030200 |
| N | -0.18606200 | 2.31809500  | -0.65619200 |
| O | 1.99159400  | -1.89413600 | -0.41602800 |
| O | 0.22072700  | -1.76200800 | -1.65012800 |
| O | 2.02613900  | 1.49285300  | 0.90554000  |
| O | 2.95606300  | 0.60286300  | -0.82596400 |
| H | -0.51245000 | -0.12222100 | -2.56133300 |
| H | -1.07167700 | 1.46506600  | -2.59905900 |
| H | 0.51104400  | 2.59590700  | -1.34653300 |
| H | 0.20265700  | 2.53245900  | 0.26180300  |
| C | 0.77589100  | 0.01795600  | -0.31817200 |
| C | -0.42805400 | 0.88775300  | -0.76371500 |

(3) The Cartesian coordinates of TSs and IMs for the reaction between **FOX-7** and **AN7**

**TS1** (for the formation of compound **P3-1**)

|   |             |             |             |
|---|-------------|-------------|-------------|
| C | 1.61972400  | -0.51399400 | -0.94732000 |
| O | 0.30085600  | -0.78209500 | -1.29620200 |
| C | -0.37139300 | 0.34699700  | -0.93616000 |
| C | 1.63228300  | 0.80227100  | -0.54444200 |
| N | 0.45493900  | 1.39468800  | -0.62829700 |
| N | 2.40125600  | -1.53073700 | -0.40007800 |
| O | 1.90582300  | -2.65582700 | -0.27687400 |
| O | 3.52334100  | -1.21488900 | -0.02471000 |
| N | 2.74398300  | 1.47578800  | 0.12771700  |
| O | 2.72225900  | 1.35978100  | 1.34038700  |
| O | 3.54403000  | 2.07366000  | -0.54282900 |
| N | -1.46725900 | 0.68962300  | -1.93342600 |
| O | -1.30005000 | 0.29876900  | -3.05786900 |
| O | -2.35868000 | 1.38322500  | -1.49855800 |
| N | -2.65069400 | -0.69348700 | 0.28761200  |
| N | -1.48564500 | 1.18859000  | 1.38559000  |
| N | -0.65961800 | -2.39093400 | 0.89841400  |
| N | 0.59197700  | -0.80867100 | 1.98181800  |
| O | -2.64047300 | -1.38036100 | -0.72869200 |
| O | -3.57460800 | -0.54818100 | 1.03942000  |
| O | -0.50355800 | 1.54319500  | 2.02484400  |
| O | -2.50231600 | 1.81363000  | 1.25714500  |
| H | -1.31155100 | -2.59460400 | 0.14530800  |
| H | 0.11629100  | -3.04247700 | 0.98213500  |

|   |             |             |            |
|---|-------------|-------------|------------|
| H | 1.26623200  | -1.51843300 | 2.24943800 |
| H | 0.79154700  | 0.16924300  | 2.19065900 |
| C | -1.32322100 | -0.07655600 | 0.61683400 |
| C | -0.44040700 | -1.12788600 | 1.22917400 |

**IM** (for the formation of compound **P3-1**)

|   |             |             |             |
|---|-------------|-------------|-------------|
| C | 1.65689300  | 0.00915100  | 1.10078500  |
| O | 0.29807100  | 0.15877400  | 1.42745300  |
| C | -0.40448000 | -0.64326300 | 0.53091300  |
| C | 1.65453400  | -0.90686300 | 0.05631400  |
| N | 0.48130500  | -1.34021800 | -0.32201500 |
| N | 2.40208500  | 1.18675600  | 0.97691200  |
| O | 1.86172800  | 2.26612800  | 1.25839900  |
| O | 3.54732500  | 1.08123900  | 0.54994400  |
| N | 2.80154100  | -1.16468500 | -0.82001300 |
| O | 2.73633400  | -0.57463000 | -1.88876900 |
| O | 3.67233000  | -1.89858800 | -0.43963600 |
| N | -1.24715500 | -1.63468500 | 1.38282500  |
| O | -0.59305600 | -2.28324900 | 2.15447400  |
| O | -2.44131400 | -1.68515800 | 1.18530600  |
| N | -2.66445800 | 0.67636900  | 0.27474300  |
| N | -1.70355900 | -0.39144100 | -1.67997500 |
| N | -0.70901800 | 2.62259200  | 0.11282600  |
| N | 0.55641900  | 1.43214400  | -1.38817800 |
| O | -2.56522600 | 1.11371100  | 1.40794600  |
| O | -3.66114300 | 0.54980400  | -0.37900800 |
| O | -1.61935400 | 0.30355000  | -2.67268000 |
| O | -2.07258900 | -1.52895200 | -1.60102100 |
| H | -1.35465700 | 2.56652400  | 0.89698700  |
| H | 0.05184500  | 3.28946100  | 0.21886000  |
| H | 1.26956200  | 2.15682600  | -1.40526900 |
| H | 0.76094700  | 0.58201400  | -1.91416200 |
| C | -1.34085500 | 0.28564500  | -0.36469000 |
| C | -0.47487000 | 1.53471500  | -0.58591400 |

**TS2** (for the formation of compound **P3-1**)

|   |             |             |             |
|---|-------------|-------------|-------------|
| C | -1.25886100 | 0.51940500  | -0.67959500 |
| O | -0.11342000 | 0.66589000  | -1.45668500 |
| C | 0.57883100  | -0.41980800 | -0.93782200 |
| C | -1.41482700 | -0.88326700 | -0.51514600 |
| N | -0.32005000 | -1.52217600 | -0.74046800 |
| N | -2.20272200 | 1.54005500  | -0.61264900 |
| O | -1.90070800 | 2.63301600  | -1.07594100 |
| O | -3.20819000 | 1.28649600  | 0.05198000  |

|   |             |             |             |
|---|-------------|-------------|-------------|
| N | -2.58692900 | -1.55110500 | 0.05651900  |
| O | -2.69146800 | -1.42994100 | 1.26160300  |
| O | -3.30804500 | -2.15458100 | -0.69491700 |
| N | 1.73124900  | -0.81333600 | -1.82259800 |
| O | 1.68566800  | -0.46616200 | -2.97112300 |
| O | 2.56223300  | -1.49663000 | -1.26523300 |
| N | 2.31026100  | 0.93988800  | 0.44029400  |
| N | 1.36983100  | -1.11096600 | 1.42543800  |
| N | 0.16003300  | 2.32869000  | 0.82043800  |
| N | -0.74337600 | 0.70028700  | 2.19959100  |
| O | 2.56276900  | 1.38419500  | -0.66152100 |
| O | 2.86997500  | 1.17738500  | 1.47578100  |
| O | 0.39979900  | -1.67030700 | 1.90162300  |
| O | 2.51833100  | -1.43481500 | 1.54284100  |
| H | 0.49926600  | 2.55926000  | -0.11134100 |
| H | -0.54609200 | 2.98098800  | 1.14584700  |
| H | -1.48205500 | 1.34615600  | 2.45827200  |
| H | -0.98153100 | -0.27818500 | 2.33498100  |
| C | 1.05581300  | 0.07950200  | 0.53320000  |
| C | -0.04982800 | 1.01350800  | 1.08920200  |

**TS1** (for the formation of compound **P3-2**)

|   |             |             |             |
|---|-------------|-------------|-------------|
| C | -0.26569700 | -0.45721800 | 0.73982000  |
| O | 0.95653500  | -0.22335700 | 1.28871900  |
| C | 1.80977200  | -0.95869800 | 0.48223400  |
| C | -0.07883700 | -1.63750800 | -0.07025100 |
| N | 1.22772000  | -1.80322300 | -0.30597200 |
| N | -1.35347000 | -0.39763600 | 1.79884700  |
| O | -1.15644200 | -1.15936900 | 2.71054700  |
| O | -2.27519600 | 0.36393100  | 1.64346000  |
| N | -1.09455900 | -2.52405800 | -0.53323000 |
| O | -2.18390600 | -2.40564600 | 0.01125700  |
| O | -0.80135800 | -3.32675100 | -1.39717700 |
| N | 3.11830200  | -0.44356300 | 0.36141900  |
| O | 3.50139900  | 0.32039400  | 1.23813500  |
| O | 3.73599300  | -0.71281700 | -0.66578000 |
| N | -1.03577500 | 2.21036300  | 0.37186500  |
| N | -1.48884700 | 0.71944500  | -1.46500400 |
| N | 1.71944900  | 2.05718700  | -0.20125000 |
| N | 1.29527000  | 0.76464800  | -2.04856700 |
| O | -2.04972600 | 2.72712100  | -0.01600400 |
| O | -0.38854900 | 2.51550600  | 1.36454100  |
| O | -2.42247300 | 0.04593100  | -1.12168800 |
| O | -1.28402200 | 1.16342200  | -2.58413700 |

|   |             |            |             |
|---|-------------|------------|-------------|
| H | 2.68850200  | 2.16392700 | -0.48178000 |
| H | 1.46707300  | 2.30870800 | 0.75176700  |
| H | 2.28669000  | 0.60570800 | -2.20767700 |
| H | 0.63311400  | 0.35592900 | -2.69522600 |
| C | -0.49010100 | 1.05687600 | -0.39291000 |
| C | 0.88318500  | 1.33266200 | -0.92369600 |

**IM** (for the formation of compound **P3-2**)

|   |             |             |             |
|---|-------------|-------------|-------------|
| C | -0.08503800 | 0.27893900  | -0.61829400 |
| O | 1.06415400  | -0.38967300 | -0.99932100 |
| C | 2.13182300  | 0.36182600  | -0.50675200 |
| C | 0.46366400  | 1.51324800  | -0.00611500 |
| N | 1.79933000  | 1.47133900  | 0.05206500  |
| N | -0.97273900 | 0.53104400  | -1.86819600 |
| O | -0.37323300 | 0.95361300  | -2.82079000 |
| O | -2.16012000 | 0.33666000  | -1.75007100 |
| N | -0.33197500 | 2.61044000  | 0.35791300  |
| O | -1.54190400 | 2.45198600  | 0.15350600  |
| O | 0.18505600  | 3.60205000  | 0.83163400  |
| N | 3.31234800  | -0.36222700 | -0.19968400 |
| O | 3.19040000  | -1.59140200 | -0.09564500 |
| O | 4.33532200  | 0.25801600  | -0.00572100 |
| N | -1.67607400 | -1.82722900 | -0.36364500 |
| N | -1.86543200 | 0.03373800  | 1.27790300  |
| N | 0.62362900  | -2.63094700 | 0.67335000  |
| N | 0.87153500  | -0.82465800 | 2.06340100  |
| O | -2.61148700 | -2.33156500 | 0.19289300  |
| O | -1.16467000 | -2.18164800 | -1.41259200 |
| O | -3.01178900 | 0.10849100  | 0.96044800  |
| O | -1.33373800 | 0.55981000  | 2.24587500  |
| H | 1.56508500  | -2.93175200 | 0.91360400  |
| H | 0.30455200  | -2.95216500 | -0.23812100 |
| H | 1.73461300  | -1.20258800 | 2.44071800  |
| H | 0.49709500  | 0.05184000  | 2.42297200  |
| C | -0.91235000 | -0.73280300 | 0.37101500  |
| C | 0.22696300  | -1.45230000 | 1.11137100  |

**TS2** (for the formation of compound **P3-2**)

|   |             |             |             |
|---|-------------|-------------|-------------|
| C | -0.47825800 | 0.22709900  | -0.71896900 |
| O | 0.70481600  | 0.37880700  | -1.42958700 |
| C | 1.42003500  | 1.08061500  | -0.46324800 |
| C | -0.54726500 | 1.53509300  | 0.02308000  |
| N | 0.66269100  | 1.94049900  | 0.23833000  |
| N | -1.61093800 | -0.12136300 | -1.65290700 |



|   |             |             |             |
|---|-------------|-------------|-------------|
| O | -1.67875300 | 0.55407800  | -2.64364400 |
| O | -2.33611400 | -1.02540900 | -1.30041500 |
| N | -1.73175800 | 2.23155400  | 0.45928500  |
| O | -2.75536800 | 1.92067300  | -0.12322300 |
| O | -1.60423400 | 3.06270500  | 1.33138900  |
| N | 2.81137800  | 1.07507300  | -0.51292400 |
| O | 3.34264700  | 0.45260100  | -1.42565500 |
| O | 3.39622400  | 1.52973500  | 0.47570400  |
| N | -0.27628900 | -2.30199100 | -0.34508300 |
| N | -1.11124900 | -0.97353700 | 1.52285200  |
| N | 2.26221400  | -1.51204300 | 0.30792900  |
| N | 1.52049400  | -0.23713000 | 2.08856600  |
| O | -0.93850100 | -3.14876600 | 0.18158700  |
| O | 0.31679300  | -2.37100200 | -1.40338600 |
| O | -2.09796400 | -0.28158500 | 1.42768000  |
| O | -0.80086500 | -1.69203900 | 2.44236300  |
| H | 3.20468300  | -1.40640300 | 0.67036300  |
| H | 2.20005600  | -1.72195300 | -0.68538300 |
| H | 2.43091500  | 0.21461200  | 2.18628600  |
| H | 0.77623700  | 0.30363700  | 2.51431100  |
| C | -0.14172500 | -0.94314900 | 0.35202700  |
| C | 1.29935800  | -0.75561000 | 0.85870800  |

**TS1** (for the formation of compound **P3-3**)

|   |             |             |             |
|---|-------------|-------------|-------------|
| C | 0.01369000  | -0.33889400 | 0.69354700  |
| O | -1.10936000 | 0.36506700  | 1.00974400  |
| C | -2.14389400 | -0.32864400 | 0.41762300  |
| C | -0.48950000 | -1.53524200 | 0.07520900  |
| N | -1.81986000 | -1.44638800 | -0.12281800 |
| N | 0.95313700  | -0.45005200 | 1.90109100  |
| O | 0.38686400  | -0.76708400 | 2.91570500  |
| O | 2.13215900  | -0.26595000 | 1.72533500  |
| N | 0.30804000  | -2.65357300 | -0.26761000 |
| O | 1.49629100  | -2.54214900 | 0.03073300  |
| O | -0.21376100 | -3.60838200 | -0.80240400 |
| N | -3.34963100 | 0.39785300  | 0.19057600  |
| O | -3.26546500 | 1.62497300  | 0.26501000  |
| O | -4.34119600 | -0.23173400 | -0.10407800 |
| N | 1.91216600  | -0.05990800 | -1.24566000 |
| N | 1.68719700  | 1.87072800  | 0.29436100  |
| N | -0.69909200 | 0.78237500  | -2.24891000 |
| N | -0.69584300 | 2.53399300  | -0.76744800 |
| O | 3.06215000  | -0.12090900 | -0.92239300 |
| O | 1.38262600  | -0.72781600 | -2.13547300 |

|   |             |             |             |
|---|-------------|-------------|-------------|
| O | 1.07986600  | 2.26357200  | 1.28466500  |
| O | 2.71520900  | 2.31740600  | -0.13258500 |
| H | -1.52488800 | 1.14699900  | -2.70838100 |
| H | -0.23800700 | -0.05571900 | -2.60126200 |
| H | -1.64254100 | 2.77383500  | -1.04566100 |
| H | -0.43386600 | 2.85603700  | 0.16175900  |
| C | 0.97525900  | 0.79123900  | -0.46523400 |
| C | -0.16164800 | 1.41115600  | -1.22374400 |

**IM** (for the formation of compound **P3-3**)

|   |             |             |             |
|---|-------------|-------------|-------------|
| C | -0.08501600 | 0.27893000  | 0.61829700  |
| O | 1.06422400  | -0.38962600 | 0.99925800  |
| C | 2.13181500  | 0.36189200  | 0.50655400  |
| C | 0.46357800  | 1.51326200  | 0.00608500  |
| N | 1.79924400  | 1.47139000  | -0.05223700 |
| N | -0.97266700 | 0.53094300  | 1.86825100  |
| O | -0.37314700 | 0.95365700  | 2.82077000  |
| O | -2.16002000 | 0.33632200  | 1.75025300  |
| N | -0.33215800 | 2.61041500  | -0.35782600 |
| O | -1.54204900 | 2.45190900  | -0.15321600 |
| O | 0.18475100  | 3.60204200  | -0.83164600 |
| N | 3.31242800  | -0.36208100 | 0.19967500  |
| O | 3.19066800  | -1.59130900 | 0.09609300  |
| O | 4.33529800  | 0.25825900  | 0.00545000  |
| N | -1.86565600 | 0.03367500  | -1.27767900 |
| N | -1.67580400 | -1.82744700 | 0.36361500  |
| N | 0.87113600  | -0.82440700 | -2.06388400 |
| N | 0.62403000  | -2.63062200 | -0.67357500 |
| O | -3.01196900 | 0.10823600  | -0.96002100 |
| O | -1.33421600 | 0.55992400  | -2.24569600 |
| O | -1.16430000 | -2.18184200 | 1.41251600  |
| O | -2.61115500 | -2.33190400 | -0.19292200 |
| H | 1.73409300  | -1.20224300 | -2.44156400 |
| H | 0.49641500  | 0.05200900  | -2.42336800 |
| H | 1.56553800  | -2.93119700 | -0.91392800 |
| H | 0.30522000  | -2.95180900 | 0.23800300  |
| C | -0.91232000 | -0.73283500 | -0.37102500 |
| C | 0.22697500  | -1.45210900 | -1.11161500 |

**TS2** (for the formation of compound **P3-3**)

|   |             |             |             |
|---|-------------|-------------|-------------|
| C | -0.42743000 | -0.20192100 | -0.77273800 |
| O | 0.80300300  | -0.18962600 | -1.41687700 |
| C | 1.51970500  | -0.92948000 | -0.47649200 |
| C | -0.42194400 | -1.58007500 | -0.16862500 |

|   |             |             |             |
|---|-------------|-------------|-------------|
| N | 0.79936900  | -1.91663600 | 0.08124600  |
| N | -1.55292200 | 0.12965300  | -1.72254300 |
| O | -1.50958300 | -0.44408700 | -2.77896700 |
| O | -2.39196300 | 0.89425900  | -1.30820500 |
| N | -1.59073600 | -2.27620000 | 0.28890100  |
| O | -2.63833700 | -1.67496400 | 0.08426800  |
| O | -1.45304200 | -3.35473900 | 0.81421000  |
| N | 2.91840300  | -0.85367300 | -0.49478100 |
| O | 3.42556100  | -0.11021500 | -1.32748100 |
| O | 3.50708200  | -1.39008800 | 0.44134900  |
| N | -1.34505900 | 0.68076700  | 1.45140500  |
| N | -0.33625200 | 2.30957700  | -0.12822000 |
| N | 1.42570900  | 0.25483300  | 2.19743700  |
| N | 2.08133100  | 1.63449400  | 0.45775600  |
| O | -2.28312000 | 1.42017800  | 1.45929500  |
| O | -1.18137100 | -0.30062500 | 2.16305300  |
| O | -0.10552900 | 2.43845900  | -1.31173600 |
| O | -0.50748000 | 3.17400500  | 0.68744900  |
| H | 2.39480400  | 0.03030200  | 2.40559400  |
| H | 0.74660000  | -0.40300700 | 2.56312500  |
| H | 3.02550900  | 1.60665500  | 0.82904100  |
| H | 2.04781600  | 1.80912700  | -0.54534400 |
| C | -0.25258300 | 0.88261100  | 0.41243000  |
| C | 1.19302300  | 0.74832400  | 0.96847500  |

**TS1** (for the formation of compound **P3-4**)

|   |             |             |             |
|---|-------------|-------------|-------------|
| C | -1.54363300 | -0.36418600 | -1.04494400 |
| O | -0.24044100 | -0.54724600 | -1.49027600 |
| C | 0.41997900  | 0.50218800  | -0.92628700 |
| C | -1.56907700 | 0.87812700  | -0.45336200 |
| N | -0.39993400 | 1.49091900  | -0.46980400 |
| N | -2.26400200 | -1.50306400 | -0.68000700 |
| O | -3.12328300 | -1.34825700 | 0.19717400  |
| O | -1.94069200 | -2.57675300 | -1.16221200 |
| N | -2.73275600 | 1.48156200  | 0.20033900  |
| O | -3.74618600 | 1.55422600  | -0.44939300 |
| O | -2.56220000 | 1.84570600  | 1.34925800  |
| N | 1.59155900  | 0.91600100  | -1.80093400 |
| O | 2.44837400  | 0.07723600  | -1.96497400 |
| O | 1.51657500  | 2.01166800  | -2.28869600 |
| N | 1.76596500  | 0.98767800  | 1.31577800  |
| N | 2.37210900  | -1.13966600 | 0.32837100  |
| N | -0.71153600 | -0.24201800 | 2.12989400  |
| N | -0.15464500 | -2.19887900 | 1.08186300  |

|   |             |             |             |
|---|-------------|-------------|-------------|
| O | 2.41417500  | 1.71254700  | 0.60345400  |
| O | 1.50951000  | 1.17196700  | 2.49152000  |
| O | 2.08453800  | -2.17217500 | -0.25669400 |
| O | 3.47850600  | -0.78933800 | 0.64903000  |
| H | -1.64134300 | -0.59882900 | 2.32961200  |
| H | -0.52255300 | 0.72503700  | 2.36789700  |
| H | -1.00724300 | -2.62875200 | 1.42547300  |
| H | 0.36597100  | -2.67292000 | 0.34802100  |
| C | 1.22874400  | -0.23776700 | 0.64305900  |
| C | 0.10179300  | -0.92651600 | 1.34236100  |

**IM** (for the formation of compound **P3-4**)

|   |             |             |             |
|---|-------------|-------------|-------------|
| C | 1.56907500  | 0.18284900  | -1.10896600 |
| O | 0.22811600  | 0.28883600  | -1.53708800 |
| C | -0.46073300 | -0.58425000 | -0.70541500 |
| C | 1.57739200  | -0.91257400 | -0.24749400 |
| N | 0.42329800  | -1.47275400 | -0.03933000 |
| N | 2.23379800  | 1.36591700  | -0.85308100 |
| O | 3.12341700  | 1.34244600  | 0.01961300  |
| O | 1.87984300  | 2.38819200  | -1.44112700 |
| N | 2.75078800  | -1.36283500 | 0.51267400  |
| O | 3.71302400  | -1.72393900 | -0.11276500 |
| O | 2.62808000  | -1.31802700 | 1.72519400  |
| N | -1.46834700 | -1.32761900 | -1.60178900 |
| O | -2.62212600 | -0.95833900 | -1.57752000 |
| O | -0.97707200 | -2.18273900 | -2.28669600 |
| N | -1.73589900 | -0.71178200 | 1.51170100  |
| N | -2.44194400 | 1.03389700  | -0.01342200 |
| N | 0.68539300  | 0.79611800  | 1.92617900  |
| N | -0.06980000 | 2.41768700  | 0.48594700  |
| O | -2.19785300 | -1.73893700 | 1.09444800  |
| O | -1.67066200 | -0.33808100 | 2.66433700  |
| O | -2.24452200 | 1.78607600  | -0.94696400 |
| O | -3.46952800 | 0.84976800  | 0.57747000  |
| H | 1.58781500  | 1.26037700  | 2.02314400  |
| H | 0.63693500  | -0.14765300 | 2.29918800  |
| H | 0.74675000  | 2.99351500  | 0.67680800  |
| H | -0.55975500 | 2.61474400  | -0.38572800 |
| C | -1.21750300 | 0.25417900  | 0.45574600  |
| C | -0.16464700 | 1.21755900  | 1.01499900  |

**TS2** (for the formation of compound **P3-4**)

|   |            |            |             |
|---|------------|------------|-------------|
| C | 1.24154700 | 0.25988200 | -0.77969200 |
| O | 0.12839000 | 0.09246300 | -1.59675100 |

|   |             |             |             |
|---|-------------|-------------|-------------|
| C | -0.59378400 | -0.70697400 | -0.70809400 |
| C | 1.40374600  | -0.99743500 | -0.12518000 |
| N | 0.30509700  | -1.65323700 | -0.07365200 |
| N | 2.19273000  | 1.24595000  | -1.01695000 |
| O | 3.10476600  | 1.28022500  | -0.18082400 |
| O | 1.97280900  | 2.08327200  | -1.87511300 |
| N | 2.61744500  | -1.44516200 | 0.56920200  |
| O | 3.53115800  | -1.79326700 | -0.13439500 |
| O | 2.57565300  | -1.40940600 | 1.78288000  |
| N | -1.69213800 | -1.40329100 | -1.48468600 |
| O | -2.82602500 | -1.01395300 | -1.32183600 |
| O | -1.29830600 | -2.26887400 | -2.22251800 |
| N | -1.58507000 | -0.52124100 | 1.62241900  |
| N | -2.24720500 | 1.14100800  | -0.00527800 |
| N | 0.84735100  | 1.03153100  | 1.91366500  |
| N | 0.06854700  | 2.49419700  | 0.31107600  |
| O | -2.10134600 | -1.57298000 | 1.33360100  |
| O | -1.48627500 | -0.02387700 | 2.71931800  |
| O | -2.10327500 | 1.70071700  | -1.06899700 |
| O | -3.19083100 | 1.19044800  | 0.73528200  |
| H | 1.78088000  | 1.43880700  | 1.90151600  |
| H | 0.82497100  | 0.11872400  | 2.35363600  |
| H | 0.78560300  | 3.13057900  | 0.64134000  |
| H | -0.23362000 | 2.64722700  | -0.64642800 |
| C | -1.06046700 | 0.28474100  | 0.44061000  |
| C | 0.14914400  | 1.21282800  | 0.76138700  |

(4) The Cartesian coordinates of TSs and IMs for the reaction between **FOX-7** and **BN7**

**TS1** (for the formation of compound **P4-1**)

|   |             |             |             |
|---|-------------|-------------|-------------|
| C | 1.18126700  | -0.98379900 | -0.95043000 |
| O | -0.05419500 | -0.81974400 | -1.56462600 |
| C | 1.61843900  | 0.22872500  | -0.48522000 |
| N | -0.56060400 | 0.40255700  | -1.10987200 |
| C | 0.57271900  | 1.10720800  | -0.68310700 |
| N | 1.49689800  | -2.25336900 | -0.46157200 |
| O | 0.92665500  | -3.22103900 | -0.94311600 |
| O | 2.27673100  | -2.29142500 | 0.49971300  |
| N | 2.85209700  | 0.47403600  | 0.25694600  |
| O | 3.89086800  | 0.33658400  | -0.33467200 |
| O | 2.69538500  | 0.77681100  | 1.42516400  |
| N | 0.57581700  | 2.52641900  | -0.63141900 |
| O | -0.48078000 | 3.09928100  | -0.82723700 |
| O | 1.65519500  | 3.04184200  | -0.38382900 |
| N | -2.73178300 | -0.72612300 | -0.45306100 |

|   |             |             |             |
|---|-------------|-------------|-------------|
| N | -1.98481300 | 1.19366900  | 0.81429900  |
| N | -0.91759400 | -2.30796100 | 1.01081200  |
| N | 0.10951000  | -0.49428000 | 1.97218500  |
| O | -2.98193100 | -0.41337600 | -1.58075900 |
| O | -3.36485300 | -1.49405300 | 0.25556800  |
| O | -1.16236200 | 1.76260900  | 1.51482800  |
| O | -3.08535500 | 1.58494100  | 0.52087400  |
| H | -0.22580400 | -2.93719100 | 1.40514200  |
| H | -1.65548200 | -2.71415000 | 0.45158600  |
| H | 0.80251400  | -1.10733800 | 2.39167900  |
| H | 0.31528200  | 0.50003200  | 1.97491800  |
| C | -1.52998400 | -0.08356100 | 0.21234800  |
| C | -0.78178600 | -0.99281400 | 1.12860600  |

**IM** (for the formation of compound **P4-1**)

|   |             |             |             |
|---|-------------|-------------|-------------|
| C | 1.18419000  | -1.00333600 | -0.92885500 |
| O | -0.05837800 | -0.86713500 | -1.57589200 |
| C | 1.59474800  | 0.23743000  | -0.48040900 |
| N | -0.60961100 | 0.34185100  | -1.06322200 |
| C | 0.55066100  | 1.09835000  | -0.66451400 |
| N | 1.51200000  | -2.23122100 | -0.39138100 |
| O | 0.93653300  | -3.23476900 | -0.81569800 |
| O | 2.32544100  | -2.23458000 | 0.54906300  |
| N | 2.83544200  | 0.51908500  | 0.24125900  |
| O | 3.86618700  | 0.45272200  | -0.37387500 |
| O | 2.68547300  | 0.77452000  | 1.42184800  |
| N | 0.54106000  | 2.50954800  | -0.64433500 |
| O | -0.53437700 | 3.06628500  | -0.80770300 |
| O | 1.61728500  | 3.04839400  | -0.43359900 |
| N | -2.72855600 | -0.73841900 | -0.40551000 |
| N | -1.93759700 | 1.23595500  | 0.74667400  |
| N | -0.95868300 | -2.31388000 | 0.89810400  |
| N | 0.08993700  | -0.56870200 | 1.97750700  |
| O | -2.83990100 | -0.90768200 | -1.58830800 |
| O | -3.49402200 | -1.05429200 | 0.48016600  |
| O | -1.21618900 | 1.71640400  | 1.59911300  |
| O | -2.95222600 | 1.68916600  | 0.29986900  |
| H | -0.33147800 | -2.98317800 | 1.33828700  |
| H | -1.37769300 | -2.65625400 | 0.03826100  |
| H | 0.80323200  | -1.19069800 | 2.35351300  |
| H | 0.25160800  | 0.43049100  | 2.07164000  |
| C | -1.45161000 | -0.06069400 | 0.11052700  |
| C | -0.75136100 | -1.01710600 | 1.07071300  |

**TS2** (for the formation of compound **P4-1**)

|   |             |             |             |
|---|-------------|-------------|-------------|
| C | -0.75742700 | 1.06479400  | -0.67560600 |
| O | 0.20241200  | 0.68722900  | -1.62076200 |
| C | -1.51358700 | -0.08945400 | -0.36232400 |
| N | 0.57790900  | -0.58411000 | -1.07714900 |
| C | -0.68772200 | -1.11785300 | -0.64741800 |
| N | -1.10254800 | 2.39442500  | -0.47852500 |
| O | -0.46432900 | 3.25551300  | -1.06512400 |
| O | -1.92325300 | 2.58853500  | 0.42574600  |
| N | -2.81349600 | -0.12626600 | 0.30364400  |
| O | -3.78265600 | 0.06417600  | -0.38210300 |
| O | -2.76982600 | -0.32734000 | 1.50127200  |
| N | -0.99428400 | -2.51747000 | -0.68896500 |
| O | -0.15492000 | -3.27410200 | -1.12000900 |
| O | -2.10877700 | -2.80123000 | -0.27832900 |
| N | 2.70817400  | 0.31724100  | -0.63407000 |
| N | 1.82669300  | -1.23361300 | 1.01130100  |
| N | 1.19221500  | 2.21205100  | 1.04522200  |
| N | 0.04838000  | 0.47040500  | 2.04150400  |
| O | 3.35617600  | -0.60769200 | -1.04219100 |
| O | 2.93322200  | 1.49695100  | -0.79284400 |
| O | 1.02269400  | -2.12781100 | 1.14656200  |
| O | 2.87411100  | -1.08504400 | 1.58280700  |
| H | 0.65657700  | 2.87097000  | 1.60145700  |
| H | 1.67256100  | 2.59633400  | 0.23963900  |
| H | -0.50308800 | 1.15124900  | 2.55646800  |
| H | -0.44937200 | -0.41082200 | 1.94066500  |
| C | 1.41763400  | -0.09733500 | 0.08623900  |
| C | 0.71496700  | 0.95821000  | 0.95924700  |

**TS1** (for the formation of compound **P4-2**)

|   |             |             |             |
|---|-------------|-------------|-------------|
| C | -1.26490800 | -0.39481900 | 0.54307500  |
| C | -0.18410100 | -0.93477300 | 1.41940800  |
| C | 1.08143200  | 0.67396100  | -0.58136100 |
| C | 2.00676300  | -0.36237000 | -0.79720000 |
| O | 0.18352200  | -1.05400500 | -1.65148300 |
| N | 1.23421600  | 1.75970800  | 0.28152200  |
| O | 0.20051300  | 2.27975800  | 0.70733000  |
| O | 2.36861200  | 2.07637400  | 0.60642700  |
| N | 3.30469900  | -0.50196700 | -0.13272500 |
| O | 3.20956800  | -0.78097900 | 1.05618900  |
| O | 4.31261400  | -0.37171700 | -0.77000000 |
| N | -2.26749800 | -1.38559600 | 0.08051300  |
| O | -1.82150700 | -2.44487800 | -0.34306200 |

|   |             |             |             |
|---|-------------|-------------|-------------|
| O | -3.43255500 | -1.08390600 | 0.12664000  |
| N | -2.00845100 | 0.77912500  | 1.10333900  |
| O | -2.01575900 | 0.91182000  | 2.31688600  |
| O | -2.55842700 | 1.48956900  | 0.30554900  |
| N | 0.28926900  | -2.14436400 | 1.18915300  |
| H | -0.12817100 | -2.70237800 | 0.44708300  |
| H | 1.17236200  | -2.43049500 | 1.59706100  |
| N | 0.43236500  | -0.13775400 | 2.27049000  |
| H | 0.04727900  | 0.77667600  | 2.48900600  |
| H | 1.35901300  | -0.37417000 | 2.61008900  |
| N | 1.53950100  | -1.38847900 | -1.42829400 |
| C | -0.14167500 | 0.09678700  | -1.01322100 |
| N | -1.17819500 | 0.84120600  | -1.83229100 |
| O | -2.12951100 | 0.17782000  | -2.17266500 |
| O | -0.92418200 | 1.98820400  | -2.09298500 |

**IM** (for the formation of compound **P4-2**)

|   |             |             |             |
|---|-------------|-------------|-------------|
| C | 1.18945200  | -0.29678500 | -0.41688900 |
| C | 0.18561800  | -0.85268100 | -1.44433400 |
| C | -1.04747800 | 0.62115500  | 0.49716700  |
| C | -1.97740400 | -0.39551600 | 0.78292700  |
| O | -0.11037300 | -1.18090300 | 1.47695200  |
| N | -1.25625900 | 1.67586500  | -0.35647000 |
| O | -0.24351900 | 2.21541800  | -0.84997500 |
| O | -2.40447700 | 1.99235800  | -0.64232500 |
| N | -3.31067100 | -0.48772300 | 0.17783300  |
| O | -3.26781600 | -0.78791800 | -1.00782200 |
| O | -4.28760100 | -0.30176800 | 0.84916300  |
| N | 2.29110800  | -1.32806700 | -0.08658800 |
| O | 1.91168700  | -2.44011600 | 0.21639700  |
| O | 3.42662200  | -0.94789700 | -0.16201400 |
| N | 1.98636900  | 0.89040600  | -0.95133600 |
| O | 2.20454900  | 0.86950300  | -2.14667300 |
| O | 2.38547700  | 1.68065600  | -0.14610800 |
| N | -0.28275800 | -2.06217900 | -1.23515100 |
| H | 0.06017200  | -2.60039100 | -0.44152300 |
| H | -1.13147600 | -2.36885300 | -1.70017800 |
| N | -0.28229600 | -0.08998500 | -2.40529700 |
| H | 0.01780000  | 0.88121500  | -2.47821400 |
| H | -1.13241100 | -0.35824200 | -2.89122100 |
| N | -1.51010100 | -1.45130100 | 1.34731000  |
| C | 0.24606200  | 0.02375700  | 0.85166300  |
| N | 1.11194500  | 0.76382500  | 1.90235300  |
| O | 2.12455900  | 0.16835900  | 2.20398000  |



|   |            |            |            |
|---|------------|------------|------------|
| O | 0.68302500 | 1.79115800 | 2.35084500 |
|---|------------|------------|------------|

**TS2** (for the formation of compound **P4-2**)

|   |             |             |             |
|---|-------------|-------------|-------------|
| C | -0.30834100 | 0.60350800  | -0.65720100 |
| O | -0.11242500 | -0.09593100 | -1.84356500 |
| C | 1.09698100  | 0.76416000  | -0.14048800 |
| N | 0.82772400  | -1.09723600 | -1.40733500 |
| C | 1.67040200  | -0.35791400 | -0.61570700 |
| N | -1.06504300 | 1.88634700  | -0.91495100 |
| O | -0.67258800 | 2.52766300  | -1.85310800 |
| O | -1.96390900 | 2.14403300  | -0.14598300 |
| N | 1.64676800  | 1.82175700  | 0.64754200  |
| O | 2.70743200  | 1.58888400  | 1.19846800  |
| O | 1.01193500  | 2.85677600  | 0.68696600  |
| N | 2.97783900  | -0.93599800 | -0.31711800 |
| O | 2.94401300  | -2.03622100 | 0.20798300  |
| O | 3.94996700  | -0.30514900 | -0.63692900 |
| N | -2.58025200 | -0.39763800 | -0.10877100 |
| N | -0.98659800 | -0.15382600 | 1.72081300  |
| N | -1.28690500 | -2.58833400 | -0.98803300 |
| N | 0.15899500  | -2.54351500 | 0.81734900  |
| O | -3.36667400 | -0.40426700 | 0.79509600  |
| O | -2.81701000 | -0.34464600 | -1.29769200 |
| O | -0.55736800 | 0.93815900  | 2.02194100  |
| O | -1.36038500 | -1.02344300 | 2.46946400  |
| H | -0.94590600 | -3.52348200 | -1.17866000 |
| H | -1.60769000 | -2.09626100 | -1.81651700 |
| H | 0.70586800  | -3.32595900 | 0.47291800  |
| H | 0.67690200  | -2.01564200 | 1.50914000  |
| C | -1.08386900 | -0.44847200 | 0.23333400  |
| C | -0.50530300 | -1.85235300 | -0.14568500 |

**TS1** (for the formation of compound **P4-3**)

|   |             |             |             |
|---|-------------|-------------|-------------|
| C | 0.12573600  | 0.31883500  | -0.83500100 |
| O | -0.14929900 | -0.65689800 | -1.73480100 |
| C | -1.10247600 | 0.65182700  | -0.21082800 |
| N | -1.46750100 | -1.15609800 | -1.53933400 |
| C | -1.97667900 | -0.34368000 | -0.67215900 |
| N | 0.98634800  | 1.42816400  | -1.45703300 |
| O | 1.98641600  | 1.77315200  | -0.87704900 |
| O | 0.52368800  | 1.86781900  | -2.47695800 |
| N | -1.37103100 | 1.77046000  | 0.59409300  |
| O | -2.50633400 | 1.88721700  | 1.02733900  |
| O | -0.43739300 | 2.54036100  | 0.78418400  |

|   |             |             |             |
|---|-------------|-------------|-------------|
| N | -3.29196600 | -0.66437500 | -0.11184600 |
| O | -4.26498200 | -0.47704300 | -0.79485900 |
| O | -3.25015400 | -1.13150600 | 1.01280100  |
| N | 1.34608300  | 0.38576100  | 1.62581100  |
| N | 2.70454500  | -0.64426000 | -0.17101900 |
| N | -0.32191700 | -1.99648100 | 1.37108500  |
| N | 1.10797200  | -2.80243500 | -0.23321000 |
| O | 2.24411400  | 1.15930500  | 1.79662200  |
| O | 0.34418900  | 0.29337600  | 2.33575100  |
| O | 2.70192300  | -0.90172600 | -1.37061000 |
| O | 3.67012200  | -0.59593900 | 0.53975300  |
| H | -0.89422000 | -2.83071300 | 1.32296500  |
| H | -0.62263000 | -1.22482200 | 1.96392400  |
| H | 0.57808800  | -3.66343700 | -0.28083900 |
| H | 1.70989300  | -2.58579800 | -1.02343300 |
| C | 1.33898100  | -0.47535300 | 0.41517300  |
| C | 0.69490700  | -1.81918400 | 0.55784800  |

**IM** (for the formation of compound **P4-3**)

|   |             |             |             |
|---|-------------|-------------|-------------|
| C | 0.19421700  | -0.25423400 | 0.72020100  |
| O | -0.11101200 | 0.71312700  | 1.66907800  |
| C | -1.08223400 | -0.55835200 | 0.08807300  |
| N | -1.47102400 | 1.16579600  | 1.53267700  |
| C | -1.96927500 | 0.36814500  | 0.65241600  |
| N | 0.86834800  | -1.46879100 | 1.42553000  |
| O | 1.95591700  | -1.81705800 | 1.02529700  |
| O | 0.20872300  | -1.94914400 | 2.30635900  |
| N | -1.35882400 | -1.70258600 | -0.64585500 |
| O | -2.51086600 | -1.88992600 | -1.01389300 |
| O | -0.39904700 | -2.44317000 | -0.87808000 |
| N | -3.30009800 | 0.68022800  | 0.12133200  |
| O | -4.26249000 | 0.48707100  | 0.81644000  |
| O | -3.27852000 | 1.15848600  | -1.00110500 |
| N | 1.39715800  | -0.44611700 | -1.58128500 |
| N | 2.67361200  | 0.59400200  | 0.28092400  |
| N | -0.28469700 | 1.98296300  | -1.35393700 |
| N | 1.23574500  | 2.80222200  | 0.16152200  |
| O | 2.27212800  | -1.25421000 | -1.64267900 |
| O | 0.53356500  | -0.23730700 | -2.41841100 |
| O | 2.69362500  | 0.80337300  | 1.48102700  |
| O | 3.59912500  | 0.65862600  | -0.48152700 |
| H | -0.81099700 | 2.84982400  | -1.36390200 |
| H | -0.64470800 | 1.19268800  | -1.88777500 |
| H | 0.80354800  | 3.71799100  | 0.12784300  |

|   |            |            |             |
|---|------------|------------|-------------|
| H | 1.80461000 | 2.59889600 | 0.98022100  |
| C | 1.28380000 | 0.39525200 | -0.30526000 |
| C | 0.72629400 | 1.80713100 | -0.54589500 |

**TS2** (for the formation of compound **P4-3**)

|   |             |             |             |
|---|-------------|-------------|-------------|
| C | 0.36000000  | 0.57488100  | -0.72156800 |
| O | 0.17630700  | -0.21608600 | -1.85492600 |
| C | -1.06378000 | 0.83356600  | -0.30199700 |
| N | -0.80762800 | -1.15129600 | -1.36499400 |
| C | -1.65966700 | -0.30746100 | -0.68263000 |
| N | 1.17178500  | 1.81089600  | -1.02595700 |
| O | 1.95639300  | 2.14875600  | -0.17182600 |
| O | 0.91052400  | 2.35261000  | -2.06896100 |
| N | -1.53032900 | 1.84442000  | 0.58556100  |
| O | -2.70816000 | 1.82172000  | 0.88051900  |
| O | -0.68554400 | 2.63173800  | 0.97841600  |
| N | -2.98233900 | -0.81705300 | -0.33475100 |
| O | -3.92983600 | -0.28832800 | -0.85259800 |
| O | -2.98045300 | -1.76417000 | 0.43072000  |
| N | 0.84627200  | 0.02798100  | 1.70982700  |
| N | 2.53867400  | -0.58182300 | 0.00639700  |
| N | -0.19669900 | -2.52240200 | 0.93277700  |
| N | 1.24390100  | -2.60188200 | -0.87352400 |
| O | 1.75015700  | 0.57691500  | 2.26971600  |
| O | -0.28575600 | -0.13791200 | 2.14184700  |
| O | 2.90185000  | -0.26260400 | -1.10712300 |
| O | 3.18921000  | -1.09963100 | 0.87193400  |
| H | -0.53463400 | -3.44534700 | 0.68636700  |
| H | -0.85076400 | -1.99938000 | 1.50313600  |
| H | 0.88383700  | -3.52860200 | -1.07200900 |
| H | 1.54562200  | -2.12739200 | -1.72056700 |
| C | 1.04739200  | -0.43398300 | 0.27832700  |
| C | 0.41821300  | -1.84454200 | -0.06980600 |

**TS1** (for the formation of compound **P4-4**)

|   |             |             |             |
|---|-------------|-------------|-------------|
| C | 1.20384000  | 1.00098000  | -0.90081300 |
| O | -0.00958700 | 0.88784800  | -1.56467300 |
| C | 1.59946100  | -0.24055600 | -0.46938800 |
| N | -0.56460300 | -0.33811300 | -1.17829800 |
| C | 0.55409100  | -1.08666500 | -0.75804400 |
| N | 1.56185200  | 2.24202500  | -0.38660100 |
| O | 0.99536300  | 3.24099300  | -0.82120000 |
| O | 2.38123500  | 2.23694800  | 0.54030500  |
| N | 2.79956400  | -0.54442800 | 0.30620500  |

|   |             |             |             |
|---|-------------|-------------|-------------|
| O | 2.59691300  | -0.77318500 | 1.48312000  |
| O | 3.85382600  | -0.52079600 | -0.27246000 |
| N | 0.53009200  | -2.50397900 | -0.70090400 |
| O | -0.53186100 | -3.05877100 | -0.92146100 |
| O | 1.59350900  | -3.03764700 | -0.42672300 |
| N | -1.86893200 | -1.24590000 | 0.75734200  |
| N | -2.78308600 | 0.71127400  | -0.35462500 |
| N | 0.01020500  | 0.66321500  | 2.01296300  |
| N | -1.03718600 | 2.33714200  | 0.80610000  |
| O | -2.85094600 | -1.78837400 | 0.32800000  |
| O | -1.05516200 | -1.71197000 | 1.54508200  |
| O | -2.73756000 | 1.17391300  | -1.47049100 |
| O | -3.69571600 | 0.77241000  | 0.43443000  |
| H | 0.69644900  | 1.31634500  | 2.38027600  |
| H | 0.17322400  | -0.32843200 | 2.16603900  |
| H | -0.44156200 | 3.03875700  | 1.23574700  |
| H | -1.40832000 | 2.61301700  | -0.10028100 |
| C | -1.51902600 | 0.07081600  | 0.17948700  |
| C | -0.81757500 | 1.04554200  | 1.05734400  |

**IM** (for the formation of compound **P4-4**)

|   |             |             |             |
|---|-------------|-------------|-------------|
| C | -1.18420200 | -1.00334300 | -0.92881900 |
| O | 0.05835100  | -0.86717400 | -1.57588500 |
| C | -1.59473700 | 0.23743600  | -0.48039400 |
| N | 0.60961300  | 0.34182000  | -1.06326400 |
| C | -0.55064800 | 1.09834200  | -0.66455600 |
| N | -1.51205500 | -2.23121800 | -0.39135500 |
| O | -0.93659300 | -3.23478100 | -0.81565500 |
| O | -2.32553300 | -2.23455800 | 0.54905300  |
| N | -2.83540800 | 0.51912800  | 0.24129700  |
| O | -2.68541000 | 0.77451200  | 1.42189400  |
| O | -3.86616300 | 0.45284600  | -0.37382700 |
| N | -0.54104300 | 2.50953800  | -0.64437600 |
| O | 0.53438800  | 3.06627600  | -0.80778000 |
| O | -1.61726200 | 3.04838400  | -0.43360500 |
| N | 1.93756100  | 1.23597500  | 0.74663600  |
| N | 2.72857900  | -0.73842400 | -0.40546000 |
| N | -0.08986600 | -0.56876200 | 1.97754400  |
| N | 0.95872000  | -2.31388800 | 0.89799700  |
| O | 2.95215100  | 1.68923200  | 0.29979200  |
| O | 1.21616000  | 1.71639900  | 1.59909800  |
| O | 2.83983400  | -0.90800200 | -1.58822600 |
| O | 3.49412500  | -1.05402300 | 0.48023700  |
| H | -0.80313600 | -1.19077500 | 2.35356500  |

|   |             |             |            |
|---|-------------|-------------|------------|
| H | -0.25152000 | 0.43042800  | 2.07173700 |
| H | 0.33158900  | -2.98322200 | 1.33822900 |
| H | 1.37755300  | -2.65620400 | 0.03804000 |
| C | 1.45161000  | -0.06069300 | 0.11050800 |
| C | 0.75138000  | -1.01712400 | 1.07068300 |

**TS2** (for the formation of compound **P4-4**)

|   |             |             |             |
|---|-------------|-------------|-------------|
| C | 0.89564800  | 1.03177200  | -0.65456300 |
| O | -0.10345100 | 0.84193400  | -1.61000200 |
| C | 1.48994700  | -0.22922600 | -0.40261200 |
| N | -0.64251900 | -0.40231400 | -1.16611800 |
| C | 0.55470100  | -1.11985500 | -0.78721500 |
| N | 1.44287700  | 2.29076700  | -0.44334100 |
| O | 0.93023800  | 3.24601300  | -1.01375800 |
| O | 2.30651800  | 2.34889900  | 0.43669700  |
| N | 2.72772800  | -0.47485300 | 0.33046700  |
| O | 2.58094500  | -0.59040600 | 1.53102200  |
| O | 3.74774200  | -0.52039200 | -0.30347000 |
| N | 0.59238000  | -2.54372500 | -0.72450900 |
| O | -0.44656100 | -3.13470900 | -0.94867800 |
| O | 1.67202200  | -3.02620400 | -0.43231300 |
| N | -1.68510900 | -1.27608900 | 0.82798400  |
| N | -2.74298300 | 0.58547600  | -0.33144300 |
| N | -0.06475600 | 0.84251300  | 2.07216400  |
| N | -1.12223100 | 2.36675400  | 0.67749500  |
| O | -2.70604600 | -1.83563200 | 0.54241700  |
| O | -0.80852800 | -1.67306100 | 1.57440900  |
| O | -2.88004400 | 0.89823700  | -1.48691900 |
| O | -3.52031400 | 0.72009500  | 0.58109600  |
| H | 0.50096100  | 1.58727800  | 2.46786800  |
| H | 0.32032200  | -0.08682700 | 2.20692600  |
| H | -0.66306700 | 3.11983600  | 1.18021100  |
| H | -1.34331500 | 2.62134900  | -0.28338500 |
| C | -1.38121900 | 0.01320900  | 0.08376100  |
| C | -0.64787200 | 1.11084500  | 0.88821000  |

(5) The Cartesian coordinates of TSs and IMs for the reaction between **FOX-7** and **DN3**

**TS1** (for the formation of compound **P5-1**)

|   |             |             |             |
|---|-------------|-------------|-------------|
| C | -1.14674000 | -1.19748500 | -0.56444500 |
| O | -0.75937400 | -0.28222400 | -1.54380900 |
| N | 0.55972500  | -0.02029500 | -1.10157000 |
| N | -0.14122200 | -1.98000400 | -0.17535100 |
| C | 0.89511600  | -1.30675000 | -0.56809200 |
| N | -2.49230100 | -1.33270500 | -0.23307500 |

|   |             |             |             |
|---|-------------|-------------|-------------|
| O | -2.74978900 | -2.00959000 | 0.76428900  |
| O | -3.29008800 | -0.62089900 | -0.83382800 |
| N | 2.26158400  | -1.73846400 | -0.39931900 |
| O | 3.08351600  | -1.26011700 | -1.15052200 |
| O | 2.45793900  | -2.54539300 | 0.49075300  |
| N | -0.25022100 | 2.19398800  | -0.72919100 |
| N | 1.49389100  | 1.40885000  | 0.76395200  |
| N | -1.96026000 | 0.90015700  | 1.31909100  |
| N | -0.14243600 | -0.30375200 | 2.09600100  |
| O | 0.61351200  | 2.71415500  | -1.38123400 |
| O | -1.42406500 | 2.49894900  | -0.69412400 |
| O | 2.32199300  | 0.53616200  | 0.91276200  |
| O | 1.53264600  | 2.54042600  | 1.16903300  |
| H | -2.57549100 | 0.34611600  | 1.90895400  |
| H | -2.40339000 | 1.40900200  | 0.56142600  |
| H | -0.77162200 | -0.85654300 | 2.67148500  |
| H | 0.73283300  | -0.77992800 | 1.89208500  |
| C | 0.21543300  | 0.98419700  | 0.06988600  |
| C | -0.72613600 | 0.42256600  | 1.11527300  |

**TS1** (for the formation of compound **P5-2**)

|   |             |             |             |
|---|-------------|-------------|-------------|
| C | 0.07845600  | 0.88702500  | -0.07809100 |
| O | 0.44059800  | 0.91011400  | -1.39996300 |
| N | 1.80715200  | 0.53162400  | -1.44981900 |
| N | 1.15174700  | 0.73750800  | 0.73399500  |
| C | 2.09161900  | 0.48363800  | -0.18703300 |
| N | -0.80951700 | 2.08192200  | 0.29968400  |
| O | -1.52856300 | 1.92819600  | 1.26115800  |
| O | -0.63626500 | 3.07935700  | -0.34775000 |
| N | 3.41724700  | -0.00467100 | 0.20752400  |
| O | 4.37761200  | 0.40251600  | -0.39904900 |
| O | 3.41763100  | -0.83289900 | 1.10472600  |
| N | -2.10221900 | -0.35921300 | -1.04863800 |
| N | -1.77032000 | -0.62724200 | 1.32560000  |
| N | -0.13888600 | -2.39175100 | -1.34100700 |
| N | 0.71817900  | -1.98131900 | 0.75299300  |
| O | -2.44704300 | 0.77500700  | -1.25150600 |
| O | -2.54885300 | -1.35141600 | -1.60383900 |
| O | -1.06308100 | -0.77413800 | 2.30134900  |
| O | -2.97353700 | -0.53900900 | 1.30232800  |
| H | 0.59571800  | -3.05682300 | -1.54284400 |
| H | -0.90531700 | -2.28828500 | -1.99547400 |
| H | 1.45375600  | -2.66696400 | 0.62771200  |
| H | 0.82324100  | -1.32073600 | 1.52463500  |

|   |             |             |             |
|---|-------------|-------------|-------------|
| C | -1.05292000 | -0.54423500 | 0.01270700  |
| C | -0.14867000 | -1.71926600 | -0.20024800 |

**IM** (for the formation of compound **P5-2**)

|   |             |             |             |
|---|-------------|-------------|-------------|
| C | 0.07511000  | 0.76783300  | -0.08232600 |
| O | 0.45635800  | 0.80139900  | -1.41498300 |
| N | 1.85161900  | 0.48630000  | -1.46329200 |
| N | 1.17394900  | 0.57264600  | 0.72917800  |
| C | 2.11878900  | 0.40264900  | -0.20129000 |
| N | -0.65634800 | 2.08646000  | 0.30732000  |
| O | -1.47858900 | 1.99597900  | 1.19572400  |
| O | -0.26920300 | 3.07765500  | -0.24664400 |
| N | 3.44279700  | -0.09543600 | 0.18944700  |
| O | 4.41834500  | 0.39263800  | -0.32431600 |
| O | 3.42392200  | -1.02032100 | 0.98851000  |
| N | -2.14388700 | -0.19152600 | -1.01852100 |
| N | -1.76351200 | -0.53760800 | 1.35568700  |
| N | -0.48905800 | -2.46646100 | -1.32489900 |
| N | 0.63034800  | -2.04183900 | 0.64116700  |
| O | -2.33205000 | 0.95152900  | -1.33159700 |
| O | -2.77241800 | -1.16037800 | -1.41390400 |
| O | -1.03819600 | -0.72541000 | 2.30378300  |
| O | -2.96293700 | -0.43027400 | 1.34606100  |
| H | 0.12042100  | -3.24466700 | -1.54162200 |
| H | -1.30560200 | -2.30491900 | -1.90341300 |
| H | 1.26089500  | -2.82373500 | 0.50128200  |
| H | 0.91745500  | -1.31938600 | 1.31691900  |
| C | -1.05268900 | -0.44321300 | 0.00819700  |
| C | -0.28727300 | -1.73686700 | -0.24239000 |

**TS2** (for the formation of compound **P5-2**)

|   |             |             |             |
|---|-------------|-------------|-------------|
| C | -0.23416000 | 0.98552700  | -0.09354800 |
| O | 0.10025100  | 0.98295500  | -1.44215300 |
| N | 1.27742500  | 0.14686100  | -1.35333800 |
| N | 0.97754500  | 1.18086300  | 0.66363800  |
| C | 1.78247000  | 0.64846200  | -0.17167300 |
| N | -1.29427700 | 2.00850300  | 0.22304600  |
| O | -1.54082300 | 2.14007600  | 1.39696500  |
| O | -1.80384400 | 2.55766200  | -0.72447400 |
| N | 3.20212900  | 0.41197200  | 0.15110200  |
| O | 4.00744000  | 0.88506600  | -0.61275600 |
| O | 3.42293300  | -0.24856700 | 1.14816300  |
| N | -2.12884900 | -0.48250400 | -0.65135900 |
| N | -1.01927700 | -1.04033700 | 1.43657300  |

|   |             |             |             |
|---|-------------|-------------|-------------|
| N | 0.01311300  | -2.16688300 | -1.67643000 |
| N | 1.14556800  | -1.99467400 | 0.32664700  |
| O | -3.04155200 | -0.13450500 | 0.05719000  |
| O | -2.18206000 | -0.71080800 | -1.83824500 |
| O | -0.41073200 | -0.51649000 | 2.33873100  |
| O | -1.74339200 | -2.00334000 | 1.48893300  |
| H | 0.79114400  | -2.69030800 | -2.06141900 |
| H | -0.54682400 | -1.70691100 | -2.38377400 |
| H | 1.79779400  | -2.69059300 | -0.01175000 |
| H | 1.49387800  | -1.45508400 | 1.11528800  |
| C | -0.76621900 | -0.50336000 | 0.04106400  |
| C | 0.34867300  | -1.38398300 | -0.60856400 |

**TS1** (for the formation of compound **P5-3**)

|   |             |             |             |
|---|-------------|-------------|-------------|
| C | -0.07844100 | 0.88700700  | -0.07808900 |
| O | -0.44058800 | 0.91010200  | -1.39996200 |
| N | -1.80714800 | 0.53162900  | -1.44981500 |
| N | -1.15173800 | 0.73750200  | 0.73399800  |
| C | -2.09161200 | 0.48364400  | -0.18702900 |
| N | 0.80952100  | 2.08192000  | 0.29968100  |
| O | 1.52859700  | 1.92820000  | 1.26113300  |
| O | 0.63622800  | 3.07935800  | -0.34773700 |
| N | -3.41724100 | -0.00466300 | 0.20752500  |
| O | -4.37759900 | 0.40247000  | -0.39909500 |
| O | -3.41763100 | -0.83284200 | 1.10477300  |
| N | 1.77032000  | -0.62724200 | 1.32559600  |
| N | 2.10220900  | -0.35921200 | -1.04864500 |
| N | -0.71817300 | -1.98131900 | 0.75301400  |
| N | 0.13886600  | -2.39175100 | -1.34099700 |
| O | 2.97353900  | -0.53905400 | 1.30231100  |
| O | 1.06308300  | -0.77410200 | 2.30135100  |
| O | 2.44704500  | 0.77500600  | -1.25150000 |
| O | 2.54882700  | -1.35141300 | -1.60386000 |
| H | -1.45375600 | -2.66696000 | 0.62774600  |
| H | -0.82321300 | -1.32074000 | 1.52466400  |
| H | -0.59573700 | -3.05682700 | -1.54282700 |
| H | 0.90528500  | -2.28827400 | -1.99547700 |
| C | 1.05291000  | -0.54422700 | 0.01270500  |
| C | 0.14865900  | -1.71926600 | -0.20024000 |

**IM** (for the formation of compound **P5-3**)

|   |             |            |             |
|---|-------------|------------|-------------|
| C | -0.07511000 | 0.76783300 | -0.08232600 |
| O | -0.45635800 | 0.80139900 | -1.41498300 |
| N | -1.85161900 | 0.48630000 | -1.46329200 |



|   |             |             |             |
|---|-------------|-------------|-------------|
| N | -1.17394900 | 0.57264600  | 0.72917800  |
| C | -2.11878900 | 0.40264900  | -0.20129000 |
| N | 0.65634800  | 2.08646000  | 0.30732000  |
| O | 1.47858900  | 1.99597900  | 1.19572400  |
| O | 0.26920300  | 3.07765500  | -0.24664400 |
| N | -3.44279700 | -0.09543600 | 0.18944700  |
| O | -4.41834500 | 0.39263800  | -0.32431600 |
| O | -3.42392200 | -1.02032100 | 0.98851000  |
| N | 1.76351200  | -0.53760800 | 1.35568700  |
| N | 2.14388700  | -0.19152600 | -1.01852100 |
| N | -0.63034800 | -2.04183900 | 0.64116700  |
| N | 0.48905800  | -2.46646100 | -1.32489900 |
| O | 2.96293700  | -0.43027400 | 1.34606100  |
| O | 1.03819600  | -0.72541000 | 2.30378300  |
| O | 2.33205000  | 0.95152900  | -1.33159700 |
| O | 2.77241800  | -1.16037800 | -1.41390400 |
| H | -1.26089500 | -2.82373500 | 0.50128200  |
| H | -0.91745500 | -1.31938600 | 1.31691900  |
| H | -0.12042200 | -3.24466700 | -1.54162200 |
| H | 1.30560200  | -2.30491900 | -1.90341300 |
| C | 1.05268900  | -0.44321300 | 0.00819700  |
| C | 0.28727300  | -1.73686700 | -0.24239000 |

**TS2** (for the formation of compound **P5-3**)

|   |             |             |             |
|---|-------------|-------------|-------------|
| C | 0.29955600  | 1.00593700  | -0.23008600 |
| O | -0.03442400 | 0.91124400  | -1.56828600 |
| N | -1.24507200 | 0.13589100  | -1.42834100 |
| N | -0.89900100 | 1.33237700  | 0.49384400  |
| C | -1.71625200 | 0.70824200  | -0.27090000 |
| N | 1.39028200  | 2.00826200  | 0.02338100  |
| O | 1.93616500  | 1.88082500  | 1.09707200  |
| O | 1.57159000  | 2.84359100  | -0.82163900 |
| N | -3.09933800 | 0.42486900  | 0.12325200  |
| O | -3.45798200 | -0.72114200 | -0.08861700 |
| O | -3.73471300 | 1.31491100  | 0.62583400  |
| N | 0.51786000  | -0.74939300 | 1.63686400  |
| N | 2.14348200  | -0.81392100 | -0.20133300 |
| N | -0.96006000 | -2.36340700 | -0.23753800 |
| N | 0.47504100  | -1.74605100 | -1.93947200 |
| O | 1.48305800  | -0.64267300 | 2.34086900  |
| O | -0.62451000 | -0.97324700 | 1.99851300  |
| O | 2.66663200  | -0.04864700 | -0.98626700 |
| O | 2.59688300  | -1.83082200 | 0.24886800  |
| H | -1.49815900 | -2.90440600 | -0.90422500 |

|   |             |             |             |
|---|-------------|-------------|-------------|
| H | -1.48188400 | -2.11263900 | 0.59306100  |
| H | -0.07285400 | -2.32250600 | -2.56818100 |
| H | 0.91154400  | -0.96555700 | -2.42245900 |
| C | 0.69956700  | -0.50351600 | 0.15227200  |
| C | -0.17330500 | -1.40526300 | -0.77854800 |

**TS1** (for the formation of compound **P5-4**)

|   |             |             |             |
|---|-------------|-------------|-------------|
| C | -0.31218300 | 1.06903100  | 0.07306900  |
| C | 0.91965400  | 0.79282900  | 0.79248000  |
| O | 0.81423500  | -0.41803900 | -1.46240500 |
| N | -0.39189600 | 2.17069300  | -0.90092300 |
| O | 0.62126500  | 2.40352400  | -1.53603900 |
| O | -1.46511400 | 2.70757000  | -1.03227800 |
| N | -1.50980500 | 1.12873600  | 0.96787300  |
| O | -2.34683100 | 0.26560400  | 0.87202600  |
| O | -1.51200600 | 2.07491100  | 1.72133900  |
| N | 2.05604100  | 1.52401800  | 0.55875800  |
| H | 2.21692400  | 1.87567500  | -0.37875200 |
| H | 2.87798800  | 1.22683900  | 1.07276700  |
| N | 0.69418000  | 0.26465400  | 2.08940500  |
| H | 1.40492800  | -0.41921700 | 2.34551300  |
| H | 0.65687100  | 1.01555800  | 2.77748900  |
| N | 0.29416500  | -1.84255000 | 0.19785900  |
| N | -0.55068300 | -0.32223800 | -1.25049100 |
| C | -0.75958600 | -1.42479900 | -0.42637400 |
| C | 1.20906600  | -0.97298100 | -0.28179100 |
| N | -2.08585700 | -2.03397300 | -0.29713300 |
| O | -2.89603200 | -1.70816100 | -1.13494500 |
| O | -2.22165300 | -2.81874800 | 0.61113500  |
| N | 2.63133800  | -1.15963800 | -0.10049600 |
| O | 2.97010400  | -1.54892900 | 1.00489000  |
| O | 3.35343300  | -0.78163700 | -0.99563100 |

(6) The Cartesian coordinates of TSs and IMs for the reaction between **FOX-7** and **FN2**

**TS1** (for the formation of compounds **P6-1 and P6-2**)

|   |             |             |             |
|---|-------------|-------------|-------------|
| O | 1.00476200  | 0.83468800  | 0.61369600  |
| N | 1.73298000  | 0.82171000  | -1.48980800 |
| N | -1.70673400 | -0.89649300 | -1.31478400 |
| N | -2.02346700 | -0.44859400 | 1.09620800  |
| N | 0.88022400  | -2.04469400 | -0.47624000 |
| N | 0.31191200  | -1.67951700 | 1.71005800  |
| O | -2.79943500 | -0.44084700 | -1.49831300 |
| O | -1.05736000 | -1.54557200 | -2.12233700 |
| O | -1.62783500 | 0.22067700  | 2.04370400  |

|   |             |             |             |
|---|-------------|-------------|-------------|
| O | -3.06360300 | -1.04238400 | 1.02575800  |
| H | 1.75363800  | -2.47199800 | -0.18403700 |
| H | 0.65497300  | -1.94105400 | -1.46358800 |
| H | 1.24438100  | -1.98143500 | 1.98011800  |
| H | -0.15569200 | -1.06529100 | 2.37173300  |
| C | -1.01909000 | -0.57232900 | -0.01609500 |
| C | -0.05016900 | 0.88434400  | -0.24916500 |
| C | 2.08641200  | 0.75921800  | -0.24245700 |
| C | 0.07441800  | -1.52408400 | 0.41941200  |
| N | 0.40838500  | 0.95042700  | -1.55924900 |
| N | 3.21905100  | 0.03083900  | 0.19970900  |
| O | 3.04131100  | -0.73625700 | 1.15833400  |
| O | 4.25756600  | 0.15070300  | -0.41213500 |
| N | -0.99209100 | 2.03966200  | 0.12402800  |
| O | -0.45701400 | 3.00713200  | 0.59688300  |
| O | -2.15571000 | 1.89729600  | -0.18107400 |

**IM1** (for the formation of compounds **P6-1** and **P6-2**)

|   |             |             |             |
|---|-------------|-------------|-------------|
| O | -0.99010000 | 0.72489900  | -0.70396300 |
| N | -1.72838700 | 0.90178700  | 1.39312400  |
| N | 1.74938000  | -0.74336100 | 1.32665600  |
| N | 2.01566600  | -0.48942200 | -1.07298400 |
| N | -0.85809200 | -1.88655400 | 0.78115500  |
| N | -0.29661700 | -1.99833100 | -1.44256000 |
| O | 2.34727600  | 0.18893500  | 1.78046600  |
| O | 1.70820800  | -1.88418600 | 1.74757400  |
| O | 1.57766200  | -0.17145200 | -2.16706200 |
| O | 3.13734600  | -0.81316300 | -0.79997800 |
| H | -1.73202000 | -2.37761500 | 0.61616700  |
| H | -0.68082100 | -1.50743300 | 1.70836400  |
| H | -1.19946600 | -2.41709100 | -1.64968400 |
| H | 0.17095100  | -1.53089200 | -2.21583000 |
| C | 0.98117600  | -0.48475100 | 0.03610000  |
| C | 0.08608000  | 0.82951300  | 0.15421100  |
| C | -2.08807500 | 0.78293000  | 0.14770200  |
| C | -0.08566500 | -1.55506400 | -0.22411600 |
| N | -0.41151400 | 0.94169500  | 1.49229700  |
| N | -3.20649600 | -0.01205300 | -0.20622600 |
| O | -3.01434200 | -0.88988100 | -1.06408700 |
| O | -4.25315200 | 0.16533500  | 0.38044500  |
| N | 0.90465500  | 2.07971100  | -0.27991100 |
| O | 0.24182900  | 3.07176400  | -0.43022100 |
| O | 2.10778500  | 1.96312000  | -0.37858100 |

**TS2** (for the formation of compounds **P6-1 and P6-2**)

|   |             |             |             |
|---|-------------|-------------|-------------|
| O | 0.69037900  | -1.37221600 | -0.38053800 |
| N | 1.25697400  | -0.72599900 | 1.71002400  |
| N | -1.57228900 | 1.25807600  | 0.93655100  |
| N | -1.35361900 | 0.63423700  | -1.42519500 |
| N | 1.15846900  | 2.16670800  | 0.60434000  |
| N | 1.18421300  | 1.22407800  | -1.51409200 |
| O | -2.72305900 | 1.41278500  | 0.63662900  |
| O | -1.04457100 | 1.56028700  | 1.99033000  |
| O | -1.42177100 | -0.40388400 | -2.04900200 |
| O | -1.69420800 | 1.73095500  | -1.78025100 |
| H | 2.14668600  | 2.39402500  | 0.53525600  |
| H | 0.79158800  | 2.13359700  | 1.54951600  |
| H | 2.09419100  | 1.64690200  | -1.66953900 |
| H | 1.04642800  | 0.37617300  | -2.06138700 |
| C | -0.66370400 | 0.55955900  | -0.06444200 |
| C | -0.40102900 | -0.98927200 | 0.35967700  |
| C | 1.62983700  | -0.72524900 | 0.40915800  |
| C | 0.71285700  | 1.22693800  | -0.24494200 |
| N | 0.00563500  | -0.97075500 | 1.76244100  |
| N | 2.90598900  | -0.46984200 | -0.08799200 |
| O | 3.13595800  | -0.80928100 | -1.24515700 |
| O | 3.63441300  | 0.23640900  | 0.60887500  |
| N | -1.59397200 | -1.86349200 | 0.14581700  |
| O | -1.40526700 | -2.95674700 | -0.31398300 |
| O | -2.63268200 | -1.36751100 | 0.52887100  |

**IM2** (for the formation of compounds **P6-1 and P6-2**)

|   |             |             |             |
|---|-------------|-------------|-------------|
| C | 0.81292700  | -1.06544800 | 0.10539700  |
| C | -0.71212200 | -0.50776800 | 0.03599500  |
| C | -0.42916900 | 0.97817800  | -0.27424600 |
| C | 1.49138000  | 0.31783600  | -0.20550200 |
| N | 0.08232600  | 1.03049700  | -1.71238400 |
| N | 1.24294700  | 0.62968800  | -1.65200600 |
| O | 0.71394200  | 1.25651000  | 0.46049800  |
| N | -1.57147700 | -1.19304000 | -0.98647700 |
| O | -2.15938000 | -0.47965200 | -1.76526700 |
| O | -1.61242300 | -2.40093300 | -0.91688800 |
| N | -1.42350600 | -0.63839600 | 1.37744400  |
| O | -0.97220400 | 0.06299500  | 2.25940600  |
| O | -2.33662400 | -1.41451000 | 1.46451100  |
| N | 2.92516400  | 0.35964100  | 0.16059300  |
| O | 3.61456000  | -0.40235900 | -0.48540600 |
| O | 3.25755000  | 1.10064100  | 1.05000600  |

|   |             |             |             |
|---|-------------|-------------|-------------|
| N | -1.50969600 | 1.97682500  | -0.03116100 |
| O | -1.19135600 | 3.12340200  | -0.22157900 |
| O | -2.58627700 | 1.53566000  | 0.30719000  |
| N | 1.05409200  | -1.96749000 | -0.97363800 |
| H | 2.05968100  | -2.10684800 | -1.06364300 |
| H | 0.58535300  | -2.85854000 | -0.83399000 |
| N | 1.27666500  | -1.49932300 | 1.38347600  |
| H | 1.04409100  | -0.86894700 | 2.14812300  |
| H | 0.97487900  | -2.44529800 | 1.59894900  |

**TS3** (for the formation of compounds **P6-1** and **P6-2**)

|   |             |             |             |
|---|-------------|-------------|-------------|
| C | -0.74049500 | -1.08516700 | -0.19491100 |
| C | 0.75189300  | -0.44446100 | -0.05102600 |
| C | 0.44019100  | 0.99335700  | 0.24302000  |
| C | -1.52098400 | 0.22403800  | 0.05469000  |
| N | -0.29933100 | 0.78750200  | 2.15816800  |
| N | -1.34896100 | 0.38318200  | 1.96430800  |
| O | -0.78314500 | 1.27230800  | -0.22647700 |
| N | 1.60035300  | -1.16144500 | 0.96675000  |
| O | 2.11204800  | -0.50050100 | 1.83464700  |
| O | 1.69628700  | -2.35943300 | 0.79690300  |
| N | 1.50276300  | -0.51713900 | -1.39288400 |
| O | 1.02371100  | 0.20768800  | -2.24573000 |
| O | 2.44027100  | -1.25417700 | -1.51048000 |
| N | -2.93129700 | 0.31125900  | -0.28269200 |
| O | -3.58077800 | -0.65039300 | 0.08364300  |
| O | -3.32541800 | 1.30822500  | -0.84039600 |
| N | 1.42007300  | 2.03256900  | 0.02164600  |
| O | 1.02483500  | 3.17568200  | 0.01243300  |
| O | 2.56664800  | 1.63544600  | -0.09891000 |
| N | -0.97994800 | -2.02384100 | 0.85741800  |
| H | -1.97991100 | -2.22084900 | 0.87932400  |
| H | -0.45692200 | -2.88304000 | 0.70985700  |
| N | -1.10062200 | -1.56291200 | -1.49586500 |
| H | -0.84134700 | -0.94603000 | -2.26185500 |
| H | -0.74234100 | -2.49967100 | -1.66096200 |

**1,3-Diradical + N<sub>2</sub>** (for the formation of compounds **P6-1** and **P6-2**)

|   |             |             |             |
|---|-------------|-------------|-------------|
| C | -0.73311800 | -1.11950300 | -0.29433200 |
| C | 0.75737100  | -0.46593800 | -0.12466800 |
| C | 0.46833300  | 0.96311600  | 0.09163300  |
| C | -1.52292900 | 0.17626200  | -0.22803200 |
| N | -0.40921900 | 0.75634300  | 2.56767300  |
| N | -1.42814500 | 0.38321400  | 2.37262100  |

|   |             |             |             |
|---|-------------|-------------|-------------|
| O | -0.80121900 | 1.22997800  | -0.15092800 |
| N | 1.57843500  | -1.17490500 | 0.93152600  |
| O | 2.06447500  | -0.51127400 | 1.81015300  |
| O | 1.67054700  | -2.37627500 | 0.77478000  |
| N | 1.52153000  | -0.57604900 | -1.45200200 |
| O | 1.02975300  | 0.12285000  | -2.32136900 |
| O | 2.46194200  | -1.30978500 | -1.55060000 |
| N | -2.93994800 | 0.30833400  | -0.35124200 |
| O | -3.57093100 | -0.66782400 | 0.02469600  |
| O | -3.37907100 | 1.34337600  | -0.80312800 |
| N | 1.40772000  | 2.01238300  | -0.02944700 |
| O | 1.00716700  | 3.15823800  | -0.00587100 |
| O | 2.56617800  | 1.62862200  | -0.13157800 |
| N | -1.00478000 | -1.95391900 | 0.84401100  |
| H | -2.00654800 | -2.13951800 | 0.86218500  |
| H | -0.48797500 | -2.82773600 | 0.77558800  |
| N | -1.04250200 | -1.72951100 | -1.54982100 |
| H | -0.78083700 | -1.17481600 | -2.36120200 |
| H | -0.65193500 | -2.66587500 | -1.62062700 |

**TS1** (for the formation of compounds **P6-3** and **P6-4**)

|   |             |             |             |
|---|-------------|-------------|-------------|
| C | -1.01906600 | -0.57221800 | 0.01613200  |
| C | 0.07444300  | -1.52414800 | -0.41906000 |
| C | 2.08641900  | 0.75920200  | 0.24240400  |
| C | -0.05018100 | 0.88432700  | 0.24913900  |
| N | 1.73300100  | 0.82176800  | 1.48975900  |
| N | 0.40841700  | 0.95047300  | 1.55923100  |
| O | 1.00474300  | 0.83462500  | -0.61373700 |
| N | -1.70701000 | -0.89626600 | 1.31469700  |
| O | -1.05768300 | -1.54496800 | 2.12259000  |
| O | -2.79990000 | -0.44090400 | 1.49782100  |
| N | -2.02320700 | -0.44862600 | -1.09642400 |
| O | -1.62744800 | 0.22070500  | -2.04381400 |
| O | -3.06322000 | -1.04266700 | -1.02624400 |
| N | 3.21903500  | 0.03079500  | -0.19974900 |
| O | 3.04132300  | -0.73619000 | -1.15846100 |
| O | 4.25752500  | 0.15054900  | 0.41216900  |
| N | -0.99206600 | 2.03967900  | -0.12405700 |
| O | -2.15569600 | 1.89730200  | 0.18101300  |
| O | -0.45698000 | 3.00715600  | -0.59687900 |
| N | 0.87998900  | -2.04471100 | 0.47684200  |
| H | 1.75318500  | -2.47263400 | 0.18492800  |
| H | 0.65454300  | -1.94084100 | 1.46413100  |
| N | 0.31211400  | -1.67982600 | -1.70964600 |

|   |             |             |             |
|---|-------------|-------------|-------------|
| H | 1.24464900  | -1.98175000 | -1.97949100 |
| H | -0.15527800 | -1.06561700 | -2.37148600 |

**IM1** (for the formation of compounds **P6-3 and P6-4**)

|   |             |             |             |
|---|-------------|-------------|-------------|
| C | -0.98117600 | -0.48475300 | 0.03610000  |
| C | 0.08566600  | -1.55506300 | -0.22412100 |
| C | 2.08807400  | 0.78293100  | 0.14770300  |
| C | -0.08608100 | 0.82951300  | 0.15421100  |
| N | 1.72838500  | 0.90178600  | 1.39312600  |
| N | 0.41151300  | 0.94169400  | 1.49229800  |
| O | 0.99010000  | 0.72490100  | -0.70396300 |
| N | -1.74937700 | -0.74336400 | 1.32665700  |
| O | -1.70819600 | -1.88418800 | 1.74758000  |
| O | -2.34727800 | 0.18892900  | 1.78046500  |
| N | -2.01566800 | -0.48942300 | -1.07298200 |
| O | -1.57766800 | -0.17144800 | -2.16706000 |
| O | -3.13734700 | -0.81316700 | -0.79997500 |
| N | 3.20649600  | -0.01205200 | -0.20622500 |
| O | 3.01434200  | -0.88987800 | -1.06408800 |
| O | 4.25315200  | 0.16533600  | 0.38044700  |
| N | -0.90465700 | 2.07971000  | -0.27991000 |
| O | -2.10778700 | 1.96311900  | -0.37857700 |
| O | -0.24183100 | 3.07176300  | -0.43022100 |
| N | 0.85809500  | -1.88655600 | 0.78114700  |
| H | 1.73202500  | -2.37761200 | 0.61615400  |
| H | 0.68082100  | -1.50744600 | 1.70835900  |
| N | 0.29661800  | -1.99832400 | -1.44256800 |
| H | 1.19946700  | -2.41708200 | -1.64969400 |
| H | -0.17095000 | -1.53088100 | -2.21583600 |

**TS2** (for the formation of compounds **P6-3 and P6-4**)

|   |             |             |             |
|---|-------------|-------------|-------------|
| C | 0.66372200  | -0.55955900 | 0.06447200  |
| C | -0.71287900 | -1.22683500 | 0.24514000  |
| C | -1.62979200 | 0.72510600  | -0.40915300 |
| C | 0.40104200  | 0.98924100  | -0.35970400 |
| N | -1.25694500 | 0.72584500  | -1.71005300 |
| N | -0.00562600 | 0.97061800  | -1.76248000 |
| O | -0.69038100 | 1.37223500  | 0.38046100  |
| N | 1.57216800  | -1.25814900 | -0.93661200 |
| O | 1.04427300  | -1.56051700 | -1.99025900 |
| O | 2.72300700  | -1.41274200 | -0.63689700 |
| N | 1.35376300  | -0.63417100 | 1.42515000  |
| O | 1.42170200  | 0.40393300  | 2.04902000  |
| O | 1.69463800  | -1.73082200 | 1.78012600  |

|   |             |             |             |
|---|-------------|-------------|-------------|
| N | -2.90599900 | 0.46980500  | 0.08795800  |
| O | -3.13602300 | 0.80935100  | 1.24507400  |
| O | -3.63440200 | -0.23645400 | -0.60891600 |
| N | 1.59395500  | 1.86351000  | -0.14589200 |
| O | 2.63271500  | 1.36750500  | -0.52877000 |
| O | 1.40517400  | 2.95684000  | 0.31370500  |
| N | -1.15858600 | -2.16677300 | -0.60393700 |
| H | -2.14683800 | -2.39392200 | -0.53476900 |
| H | -0.79181800 | -2.13377400 | -1.54916100 |
| N | -1.18406800 | -1.22385000 | 1.51436700  |
| H | -2.09406400 | -1.64657800 | 1.66996700  |
| H | -1.04611400 | -0.37593500 | 2.06159600  |

**IM2** (for the formation of compounds **P6-3 and P6-4**)

|   |             |             |             |
|---|-------------|-------------|-------------|
| C | 0.70573300  | -0.50967200 | 0.03777900  |
| C | -0.78446300 | -1.07112100 | -0.00116000 |
| C | -1.46476400 | 0.33438600  | -0.18697000 |
| C | 0.45397900  | 0.98936200  | -0.23692500 |
| N | -1.23281100 | 0.73347200  | -1.62506200 |
| N | -0.06752100 | 1.11884300  | -1.66889700 |
| O | -0.68365400 | 1.23205400  | 0.51711500  |
| N | 1.59304200  | -1.19454500 | -0.97337100 |
| O | 2.10432400  | -0.48575400 | -1.80624500 |
| O | 1.68916000  | -2.39648000 | -0.87009200 |
| N | 1.30908000  | -0.69047100 | 1.43579200  |
| O | 1.34307000  | 0.28993100  | 2.13507800  |
| O | 1.65339400  | -1.81154800 | 1.72724800  |
| N | -2.89790700 | 0.39796000  | 0.18721300  |
| O | -3.29337100 | 1.37686200  | 0.75842300  |
| O | -3.54469900 | -0.57482900 | -0.16934900 |
| N | 1.54700800  | 1.97335700  | 0.01343500  |
| O | 2.66967900  | 1.52714000  | 0.07087100  |
| O | 1.18763600  | 3.12205500  | 0.07977500  |
| N | -0.98786000 | -1.86368300 | -1.18250000 |
| H | -0.58128100 | -2.78958800 | -1.07113700 |
| H | -1.98641300 | -1.94939000 | -1.36406900 |
| N | -1.15147400 | -1.57405800 | 1.29810800  |
| H | -2.11787200 | -1.89540400 | 1.26629200  |
| H | -0.56257000 | -2.36490600 | 1.55694100  |

**TS3** (for the formation of compounds **P6-3 and P6-4**)

|   |             |             |             |
|---|-------------|-------------|-------------|
| C | -0.73291600 | -0.46769300 | -0.03485100 |
| C | 0.74236300  | -1.08731400 | -0.01885800 |
| C | 1.50635000  | 0.25153700  | 0.05146700  |



|   |             |             |             |
|---|-------------|-------------|-------------|
| C | -0.46100400 | 1.00146400  | 0.12013400  |
| N | 1.28363400  | 0.66758400  | 1.93799400  |
| N | 0.21378800  | 1.06245000  | 2.02325100  |
| O | 0.75464400  | 1.24830000  | -0.36759900 |
| N | -1.62435900 | -1.07328900 | 1.02605500  |
| O | -2.16174300 | -0.31061000 | 1.79021900  |
| O | -1.70876400 | -2.28180200 | 1.01045400  |
| N | -1.39051600 | -0.72077400 | -1.41742800 |
| O | -1.28035400 | 0.18313600  | -2.20661000 |
| O | -1.88840300 | -1.80354700 | -1.60163300 |
| N | 2.90411800  | 0.32026600  | -0.31011200 |
| O | 3.34605200  | 1.36354000  | -0.72053300 |
| O | 3.52087300  | -0.71812900 | -0.09681800 |
| N | -1.45696600 | 2.02100800  | -0.14179300 |
| O | -2.60540600 | 1.62544900  | -0.18712900 |
| O | -1.05318500 | 3.15669400  | -0.24658700 |
| N | 0.96687300  | -1.86382300 | 1.16853300  |
| H | 0.51430300  | -2.77151000 | 1.09320500  |
| H | 1.97026400  | -1.99293000 | 1.29096300  |
| N | 1.01747400  | -1.65548700 | -1.32199400 |
| H | 1.98546300  | -1.97277200 | -1.34401200 |
| H | 0.41318500  | -2.46054600 | -1.48916800 |

**1,3-Diradical + N<sub>2</sub>** (for the formation of compounds **P6-3** and **P6-4**)

|   |             |             |             |
|---|-------------|-------------|-------------|
| C | -0.73223000 | -0.50374700 | -0.11349000 |
| C | 0.74356000  | -1.12821000 | -0.10871400 |
| C | 1.52094300  | 0.17285300  | -0.19853800 |
| C | -0.48518900 | 0.95213600  | -0.05515500 |
| N | 1.34975400  | 0.72970200  | 2.35869200  |
| N | 0.31417900  | 1.09782300  | 2.44468100  |
| O | 0.77502400  | 1.21921800  | -0.27800500 |
| N | -1.59725300 | -1.08724500 | 0.99257800  |
| O | -2.10726700 | -0.31625300 | 1.76466800  |
| O | -1.67812900 | -2.29698800 | 0.99652300  |
| N | -1.41155200 | -0.80131400 | -1.47655300 |
| O | -1.29573000 | 0.08539800  | -2.28634000 |
| O | -1.91871900 | -1.88174900 | -1.62909900 |
| N | 2.91613800  | 0.29912700  | -0.36552700 |
| O | 3.38289100  | 1.36858800  | -0.68903200 |
| O | 3.53485700  | -0.74543500 | -0.14770200 |
| N | -1.43981900 | 1.99273500  | -0.18452700 |
| O | -2.59849700 | 1.61095100  | -0.21308700 |
| O | -1.03031300 | 3.13435500  | -0.24314700 |
| N | 0.99674000  | -1.79689400 | 1.14299600  |

|   |            |             |             |
|---|------------|-------------|-------------|
| H | 0.54694900 | -2.70973400 | 1.15246900  |
| H | 2.00325400 | -1.91205600 | 1.25227200  |
| N | 0.97465100 | -1.81365200 | -1.36133600 |
| H | 1.95678300 | -2.08251100 | -1.40746000 |
| H | 0.40259100 | -2.65682900 | -1.41852800 |

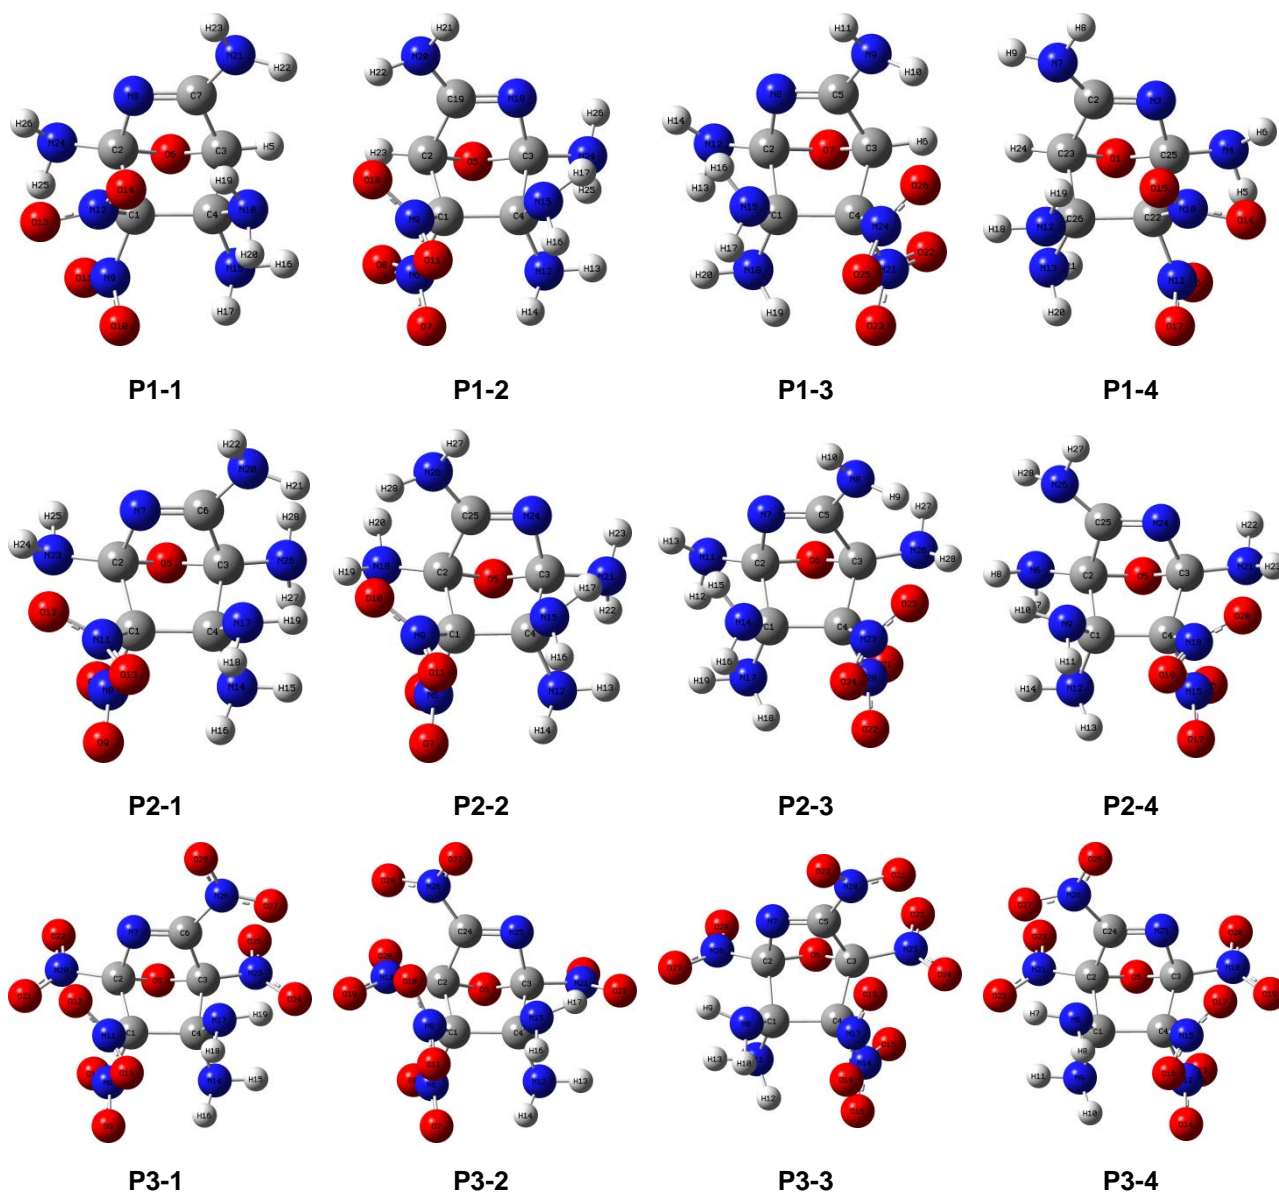

Fig. S3 The optimized structures of the compounds P1-1~P3-4

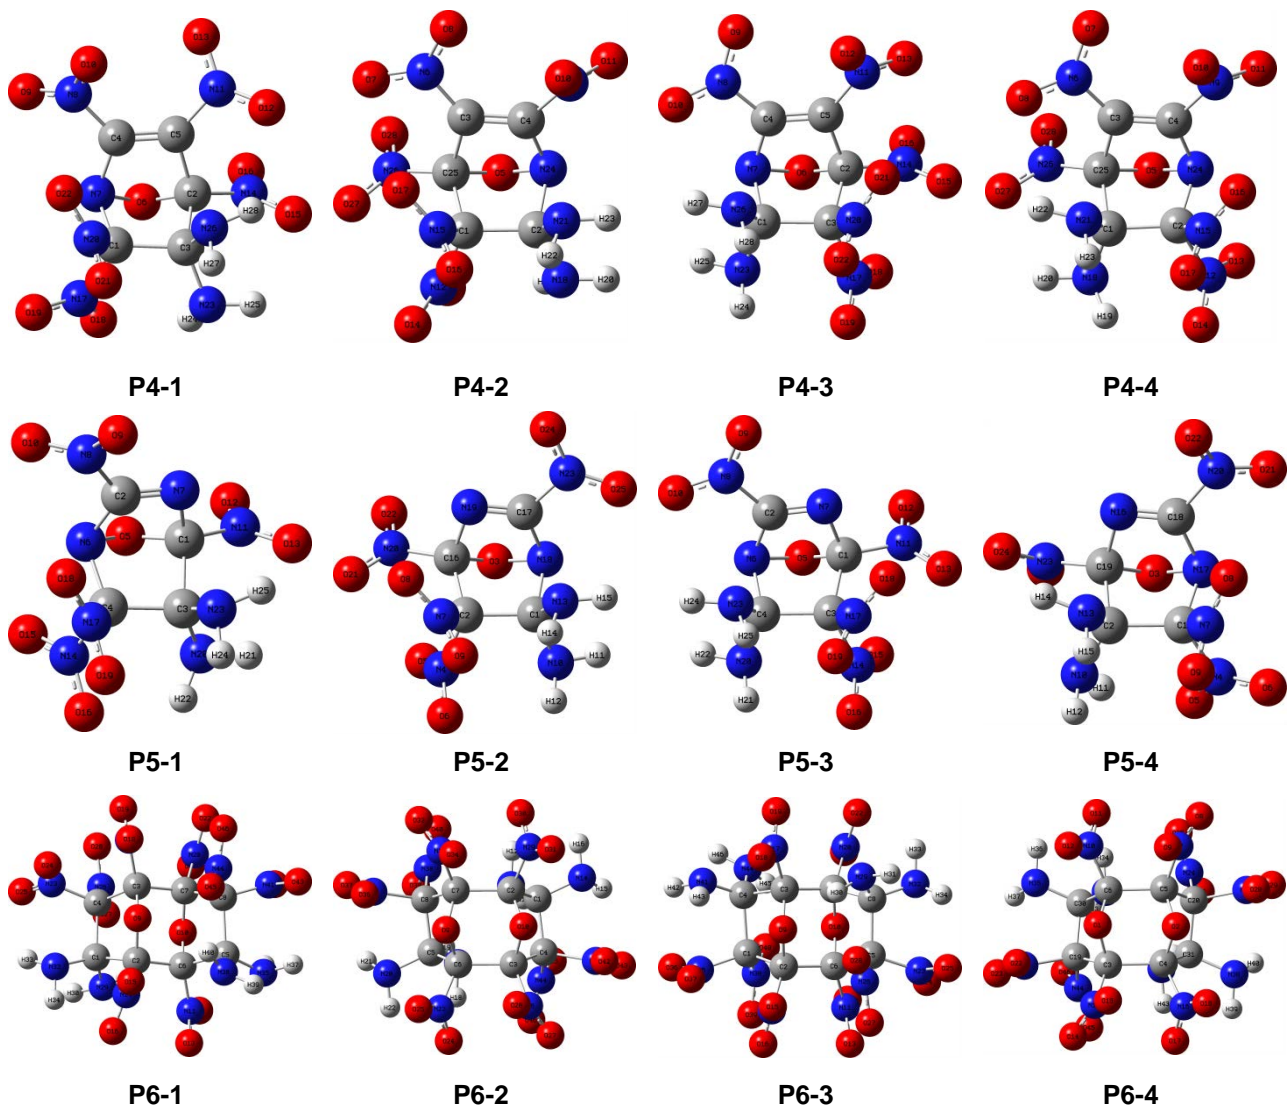

**Fig. S4** The optimized structures of the compounds **P4-1~P6-4**

**Table S3** Bond lengths (BL) and Laplacian bond order (LBO) of the compounds **P1-1~P1-4**

| Bonds            | BL (Å)        | LBO           | Bonds            | BL (Å)        | LBO           | Bonds             | BL (Å)        | LBO           | Bonds              | BL (Å)        | LBO           |
|------------------|---------------|---------------|------------------|---------------|---------------|-------------------|---------------|---------------|--------------------|---------------|---------------|
| <b>P1-1</b>      |               |               | <b>P1-2</b>      |               | 2b            | <b>P1-3</b>       |               |               | <b>P1-4</b>        |               |               |
| <b>C1-C2</b>     | <b>1.6367</b> | <b>0.6203</b> | C1-C2            | 1.5480        | 0.9192        | <b>C1-C2</b>      | <b>1.6163</b> | <b>0.7535</b> | C2-C23             | 1.5195        | 1.0527        |
| C1-C4            | 1.6044        | 0.7279        | <b>C1-C4</b>     | <b>1.5848</b> | <b>0.7935</b> | C1-C4             | 1.5925        | 0.7604        | <b>C22-C25</b>     | <b>1.6251</b> | <b>0.6664</b> |
| C3-C4            | 1.5709        | 0.8778        | C2-C19           | 1.5370        | 0.9883        | C3-C4             | 1.5458        | 0.9246        | C22-C26            | 1.6173        | 0.6866        |
| C3-C7            | 1.5238        | 1.0371        | C3-C4            | 1.5934        | 0.8357        | C3-C5             | 1.5371        | 0.9897        | C23-C26            | 1.5786        | 0.8400        |
| <b>C1-N9(O2)</b> | <b>1.5130</b> | <b>0.6190</b> | <b>C1-N6(O2)</b> | <b>1.5411</b> | <b>0.5260</b> | C1-N15(H2)        | 1.4431        | 0.8384        | C2-N7(H2)          | 1.3557        | 1.1844        |
| C1-N12(O2)       | 1.5050        | 0.6376        | C1-N9(O2)        | 1.5136        | 0.6172        | C1-N18(H2)        | 1.4487        | 0.8340        | C25-N3             | 1.4607        | 0.7942        |
| C2-N8            | 1.4611        | 0.7925        | C3-N18           | 1.4603        | 0.7952        | C2-N8             | 1.4635        | 0.7792        | C25-N4(O2)         | 1.3982        | 1.0661        |
| C2-N24(H2)       | 1.3956        | 1.0721        | C3-N24(H2)       | 1.4085        | 1.0278        | C2-N12(H2)        | 1.4040        | 1.0347        | <b>C22-N10(O2)</b> | <b>1.5068</b> | <b>0.6364</b> |
| C4-N15(H2)       | 1.4460        | 0.8538        | C4-N12(H2)       | 1.4508        | 0.8237        | <b>C4-N21(O2)</b> | <b>1.5406</b> | <b>0.5235</b> | <b>C22-N11(O2)</b> | <b>1.5048</b> | <b>0.6353</b> |
| C4-N18(H2)       | 1.4476        | 0.8294        | C4-N15(H2)       | 1.4479        | 0.8315        | C4-N24(O2)        | 1.5124        | 0.6207        | C26-N12(H2)        | 1.4289        | 0.9119        |
| C7-N21(H2)       | 1.3507        | 1.2028        | C19-N20(H2)      | 1.3549        | 1.2003        | C5-N9(H2)         | 1.3541        | 1.2034        | C26-N13(H2)        | 1.4435        | 0.8494        |
| <b>C2-O6</b>     | <b>1.4292</b> | <b>0.3597</b> | C2-O5            | 1.4173        | 0.3727        | <b>C2-O7</b>      | <b>1.4462</b> | <b>0.3151</b> | C23-O1             | 1.4247        | 0.3453        |
| C3-O6            | 1.4160        | 0.3739        | <b>C3-O5</b>     | <b>1.4611</b> | <b>0.2711</b> | C3-O7             | 1.4168        | 0.3726        | <b>C25-O1</b>      | <b>1.4386</b> | <b>0.3331</b> |
| C7=N8            | 1.2923        | 1.5729        | N18=C19          | 1.2895        | 1.6013        | C5=N8             | 1.2903        | 1.5923        | C2=N3              | 1.2907        | 1.5865        |

**Table S4** Bond lengths (BL) and Laplacian bond order (LBO) of the compounds **P2-1~P2-4**

| Bonds            | BL (Å)        | LBO           | Bonds            | BL (Å)        | LBO           | Bonds             | BL (Å)        | LBO           | Bonds             | BL (Å)        | LBO           |
|------------------|---------------|---------------|------------------|---------------|---------------|-------------------|---------------|---------------|-------------------|---------------|---------------|
| <b>P2-1</b>      |               |               | <b>P2-2</b>      |               |               | <b>P2-3</b>       |               |               | <b>P2-4</b>       |               |               |
| C1-C2            | 1.5774        | 0.8468        | C1-C2            | 1.5671        | 0.8628        | C1-C2             | 1.6133        | 0.7646        | <b>C1-C2</b>      | <b>1.6082</b> | <b>0.7582</b> |
| <b>C1-C4</b>     | <b>1.5814</b> | <b>0.8244</b> | <b>C1-C4</b>     | <b>1.5915</b> | <b>0.7747</b> | <b>C1-C4</b>      | <b>1.6007</b> | <b>0.7375</b> | C1-C4             | 1.5793        | 0.8262        |
| C3-C4            | 1.5849        | 0.8437        | C2-C25           | 1.5604        | 0.9120        | C3-C4             | 1.5645        | 0.8709        | C2-C25            | 1.5252        | 1.0457        |
| C3-C6            | 1.5253        | 1.0460        | C3-C4            | 1.5912        | 0.8431        | C3-C5             | 1.5623        | 0.9062        | C3-C4             | 1.5689        | 0.8765        |
| <b>C1-N8(O2)</b> | <b>1.5495</b> | <b>0.5062</b> | <b>C1-N6(O2)</b> | <b>1.5510</b> | <b>0.5031</b> | C1-N14(H2)        | 1.4399        | 0.8470        | C1-N9(H2)         | 1.4485        | 0.8264        |
| C1-N11(O2)       | 1.5169        | 0.6148        | C1-N9(O2)        | 1.5110        | 0.6264        | C1-N17(H2)        | 1.4495        | 0.8343        | C1-N12(H2)        | 1.4564        | 0.8010        |
| C2-N7            | 1.4827        | 0.7048        | C2-N18(H2)       | 1.4211        | 0.9498        | C2-N7             | 1.4672        | 0.7635        | C2-N6(H2)         | 1.4284        | 0.9223        |
| C2-N23(H2)       | 1.4182        | 0.9979        | C3-N21(H2)       | 1.4112        | 1.0147        | C2-N11(H2)        | 1.4083        | 1.0210        | C3-N21(H2)        | 1.4148        | 1.0109        |
| C3-N26(H2)       | 1.4132        | 0.9687        | C3-N24           | 1.4639        | 0.7783        | C3-N26(H2)        | 1.4205        | 0.9527        | C3-N24            | 1.4844        | 0.6997        |
| C4-N14(H2)       | 1.4586        | 0.7966        | C4-N12(H2)       | 1.4511        | 0.8252        | <b>C4-N20(O2)</b> | <b>1.5486</b> | <b>0.5059</b> | <b>C4-N15(O2)</b> | <b>1.5540</b> | <b>0.4945</b> |
| C4-N17(H2)       | 1.4549        | 0.8109        | C4-N15(H2)       | 1.4476        | 0.8330        | C4-N23(O2)        | 1.5084        | 0.6320        | C4-N18(O2)        | 1.5166        | 0.6152        |
| C6-N20(H2)       | 1.3558        | 1.1883        | C25-N26(H2)      | 1.3573        | 1.1819        | C5-N8(H2)         | 1.3562        | 1.1857        | C25-N26(H2)       | 1.3605        | 1.1704        |
| C2-O5            | 1.4253        | 0.3689        | C2-O5            | 1.4223        | 0.3692        | <b>C2-O6</b>      | <b>1.4345</b> | <b>0.3423</b> | C2-O5             | 1.4168        | 0.3838        |
| <b>C3-O5</b>     | <b>1.4409</b> | <b>0.3035</b> | <b>C3-O5</b>     | <b>1.4504</b> | <b>0.2936</b> | C3-O6             | 1.4204        | 0.3784        | <b>C3-O5</b>      | <b>1.4381</b> | <b>0.3349</b> |
| C6=N7            | 1.2882        | 1.6093        | N24=C25          | 1.2868        | 1.6148        | C5=N7             | 1.2878        | 1.6047        | N24=C25           | 1.2870        | 1.6184        |

**Table S5** Bond lengths (BL) and Laplacian bond order (LBO) of the compounds **P3-1~P3-4**

| Bonds            | BL (Å)        | LBO           | Bonds            | BL (Å)        | LBO           | Bonds             | BL (Å)        | LBO           | Bonds             | BL (Å)        | LBO           |
|------------------|---------------|---------------|------------------|---------------|---------------|-------------------|---------------|---------------|-------------------|---------------|---------------|
| <b>P3-1</b>      |               |               | <b>P3-2</b>      |               |               | <b>P3-3</b>       |               |               | <b>P3-4</b>       |               |               |
| C1-C2            | 1.5612        | 0.8905        | C1-C2            | 1.5606        | 0.8793        | C1-C2             | 1.5851        | 0.8233        | C1-C2             | 1.5822        | 0.8266        |
| <b>C1-C4</b>     | <b>1.6018</b> | <b>0.7492</b> | <b>C1-C4</b>     | <b>1.6027</b> | <b>0.7368</b> | <b>C1-C4</b>      | <b>1.6029</b> | <b>0.7363</b> | <b>C1-C4</b>      | <b>1.6018</b> | <b>0.7491</b> |
| C3-C4            | 1.5822        | 0.8267        | C2-C24           | 1.5402        | 0.9245        | C3-C4             | 1.5607        | 0.8791        | C2-C24            | 1.5335        | 0.9492        |
| C3-C6            | 1.5335        | 0.9492        | C3-C4            | 1.5852        | 0.8230        | C3-C5             | 1.5403        | 0.9243        | C3-C4             | 1.5612        | 0.8907        |
| <b>C1-N8(O2)</b> | <b>1.5509</b> | <b>0.5135</b> | <b>C1-N6(O2)</b> | <b>1.5388</b> | <b>0.5488</b> | C1-N8(H2)         | 1.4419        | 0.8592        | C1-N6(H2)         | 1.4518        | 0.8237        |
| C1-N11(O2)       | 1.5180        | 0.6225        | C1-N9(O2)        | 1.5228        | 0.6036        | C1-N11(H2)        | 1.4433        | 0.8516        | C1-N9(H2)         | 1.4366        | 0.8735        |
| C2-N7            | 1.4767        | 0.7269        | C2-N18(O2)       | 1.5065        | 0.6854        | C2-N7             | 1.4710        | 0.7453        | C2-N21(O2)        | 1.4997        | 0.6979        |
| C2-N20(O2)       | 1.5117        | 0.6864        | C3-N21(O2)       | 1.4995        | 0.7179        | C2-N26(O2)        | 1.4996        | 0.7177        | C3-N18(O2)        | 1.5116        | 0.6867        |
| C3-N23(O2)       | 1.4997        | 0.6979        | C3-N25           | 1.4710        | 0.7454        | C3-N23(O2)        | 1.5064        | 0.6857        | C3-N25            | 1.4767        | 0.7267        |
| C4-N14(H2)       | 1.4366        | 0.8736        | C4-N12(H2)       | 1.4433        | 0.8516        | <b>C4-N14(O2)</b> | <b>1.5386</b> | <b>0.5497</b> | <b>C4-N12(O2)</b> | <b>1.5508</b> | <b>0.5138</b> |
| C4-N17(H2)       | 1.4519        | 0.8235        | C4-N15(H2)       | 1.4419        | 0.8592        | C4-N17(O2)        | 1.5229        | 0.6035        | C4-N15(O2)        | 1.5180        | 0.6222        |
| C6-N26(O2)       | 1.4702        | 0.7986        | C24-N26(O2)      | 1.4713        | 0.7973        | C5-N20(O2)        | 1.4713        | 0.7976        | C24-N26(O2)       | 1.4702        | 0.7987        |
| C2-O5            | 1.4133        | 0.3960        | <b>C2-O5</b>     | <b>1.4160</b> | <b>0.3814</b> | C2-O6             | 1.4081        | 0.4113        | <b>C2-O5</b>      | <b>1.4107</b> | <b>0.3918</b> |
| <b>C3-O5</b>     | <b>1.4107</b> | <b>0.3918</b> | C3-O5            | 1.4082        | 0.4112        | <b>C3-O6</b>      | <b>1.4160</b> | <b>0.3815</b> | C3-O5             | 1.4133        | 0.3960        |
| C6=N7            | 1.2647        | 1.7885        | C24=N25          | 1.2650        | 1.7837        | C5=N7             | 1.2650        | 1.7836        | C24=N25           | 1.2647        | 1.7886        |

**Table S6** Bond lengths (BL) and Laplacian bond order (LBO) of the compounds **P4-1~P4-4**

| Bonds             | BL (Å)        | LBO           | Bonds         | BL (Å)        | LBO           | Bonds             | BL (Å)        | LBO           | Bonds             | BL (Å)        | LBO           |
|-------------------|---------------|---------------|---------------|---------------|---------------|-------------------|---------------|---------------|-------------------|---------------|---------------|
| <b>P4-1</b>       |               |               | <b>P4-2</b>   |               |               | <b>P4-3</b>       |               |               | <b>P4-4</b>       |               |               |
| C1-C3             | 1.5956        | 0.7804        | <b>C1-C2</b>  | <b>1.6005</b> | <b>0.7686</b> | <b>C1-C3</b>      | <b>1.6014</b> | <b>0.7557</b> | <b>C1-C2</b>      | <b>1.5884</b> | <b>0.7966</b> |
| <b>C2-C3</b>      | <b>1.5959</b> | <b>0.7591</b> | C1-C25        | 1.5650        | 0.8638        | C2-C3             | 1.5584        | 0.8848        | C1-C25            | 1.5785        | 0.8342        |
| C2-C5             | 1.5249        | 0.9508        | C3-C25        | 1.5275        | 0.9426        | C2-C5             | 1.5319        | 0.9268        | C3-C25            | 1.5278        | 0.9456        |
| C1-N7             | 1.5036        | 0.6639        | C1-N12(O2)    | 1.5438        | 0.5333        | C1-N7             | 1.5265        | <b>0.5837</b> | C1-N18(H2)        | 1.4405        | 0.8560        |
| <b>C1-N17(O2)</b> | <b>1.5477</b> | <b>0.5473</b> | C1-N15(O2)    | 1.5142        | 0.6350        | C1-N23(H2)        | 1.4323        | 0.9196        | C1-N21(H2)        | 1.4472        | 0.8394        |
| C1-N20(O2)        | 1.5109        | 0.6662        | C2-N18(H2)    | 1.4167        | 0.9729        | C1-N26(H2)        | 1.4395        | 0.8808        | <b>C2-N12(O2)</b> | <b>1.5600</b> | <b>0.5011</b> |
| C2-N14(O2)        | 1.4996        | 0.6933        | C2-N21(H2)    | 1.4317        | 0.9266        | C2-N14(O2)        | 1.5120        | 0.6638        | C2-N15(O2)        | 1.5163        | 0.6356        |
| C3-N23(H2)        | 1.4276        | 0.9007        | <b>C2-N24</b> | <b>1.5585</b> | <b>0.4613</b> | <b>C3-N17(O2)</b> | <b>1.5397</b> | <b>0.5446</b> | C2-N24            | 1.4888        | 0.7159        |
| C3-N26(H2)        | 1.4392        | 0.8769        | C3-N6(O2)     | 1.4411        | 0.8653        | C3-N20(O2)        | 1.5189        | 0.6113        | C3-N6(O2)         | 1.4379        | 0.8856        |
| C4-N7             | 1.4531        | 0.8209        | C4-N9(O2)     | 1.4635        | 0.8240        | C4-N7             | 1.4485        | 0.8537        | C4-N9(O2)         | 1.4612        | 0.8285        |
| C4-N8(O2)         | 1.4591        | 0.8384        | C4-N24        | 1.4373        | 0.8910        | C4-N8(O2)         | 1.4491        | 0.8665        | C4-N24            | 1.4491        | 0.8300        |
| C5-N11(O2)        | 1.4407        | 0.8727        | C25-N26(O2)   | 1.5086        | 0.6760        | C5-N11(O2)        | 1.4527        | 0.8376        | C25-N26(O2)       | 1.5030        | 0.6861        |
| <b>C2-O6</b>      | <b>1.4227</b> | <b>0.4077</b> | <b>C25-O5</b> | <b>1.4205</b> | <b>0.4168</b> | <b>C2-O6</b>      | <b>1.4188</b> | <b>0.4264</b> | <b>C25-O5</b>     | <b>1.4212</b> | <b>0.4154</b> |
| <b>N7-O6</b>      | <b>1.4649</b> | <b>0.1522</b> | <b>N24-O5</b> | <b>1.4604</b> | <b>0.1594</b> | <b>N7-O6</b>      | <b>1.4562</b> | <b>0.1690</b> | <b>N24-O5</b>     | <b>1.4647</b> | <b>0.1532</b> |
| C4=C5             | 1.3347        | 1.8312        | C3=C4         | 1.3353        | 1.8175        | C4=C5             | 1.3324        | 1.8425        | C3=C4             | 1.3335        | 1.8356        |

**Table S7** Bond lengths (BL) and Laplacian bond order (LBO) of the compounds **P5-1~P5-4**

| Bonds             | BL (Å)        | LBO           | Bonds            | BL (Å)        | LBO           | Bonds             | BL (Å)        | LBO           | Bonds            | BL (Å)        | LBO           |
|-------------------|---------------|---------------|------------------|---------------|---------------|-------------------|---------------|---------------|------------------|---------------|---------------|
| <b>P5-1</b>       |               |               | <b>P5-2</b>      |               |               | <b>P5-3</b>       |               |               | <b>P5-4</b>      |               |               |
| C1-C3             | 1.5789        | 0.8359        | <b>C1-C2</b>     | <b>1.6011</b> | <b>0.7603</b> | C1-C3             | 1.5575        | 0.8964        | <b>C1-C2</b>     | <b>1.6197</b> | <b>0.6816</b> |
| <b>C3-C4</b>      | <b>1.5877</b> | <b>0.7949</b> | C2-C16           | 1.5576        | 0.8961        | <b>C3-C4</b>      | <b>1.6011</b> | <b>0.7603</b> | C2-C19           | 1.5784        | 0.8352        |
| C1-N7             | 1.4688        | 0.7468        | C1-N10(H2)       | 1.4288        | 0.9306        | C1-N7             | 1.4753        | 0.7233        | <b>C1-N4(O2)</b> | <b>1.5401</b> | <b>0.5666</b> |
| C1-N11(O2)        | 1.4951        | 0.7313        | C1-N13(H2)       | 1.4437        | 0.8655        | C1-N11(O2)        | 1.5096        | 0.6935        | C1-N7(O2)        | 1.5021        | 0.6861        |
| C2-N6             | 1.4628        | 0.8048        | C1-N18           | 1.5280        | 0.5814        | C2-N6             | 1.4530        | 0.8626        | C1-N17           | 1.5034        | 0.6582        |
| C2-N8(O2)         | 1.4744        | 0.8044        | <b>C2-N4(O2)</b> | <b>1.5427</b> | <b>0.5367</b> | C2-N8(O2)         | 1.4737        | 0.7987        | C2-N10(H2)       | 1.4287        | 0.8919        |
| C3-N20(H2)        | 1.4421        | 0.8503        | C2-N7(O2)        | 1.5175        | 0.6188        | <b>C3-N14(O2)</b> | <b>1.5428</b> | <b>0.5364</b> | C2-N13(H2)       | 1.4357        | 0.8897        |
| C3-N23(H2)        | 1.4447        | 0.8480        | C16-N19          | 1.4753        | 0.7236        | C3-N17(O2)        | 1.5175        | 0.6188        | C19-N16          | 1.4624        | 0.7690        |
| C4-N6             | 1.4892        | 0.7122        | C16-N20(O2)      | 1.5097        | 0.6931        | C4-N6             | 1.5279        | 0.5815        | C18-N17          | 1.4666        | 0.7960        |
| <b>C4-N14(O2)</b> | <b>1.5516</b> | <b>0.5247</b> | C17-N18          | 1.4530        | 0.8627        | C4-N20(H2)        | 1.4289        | 0.9304        | C18-N20(O2)      | 1.4752        | 0.7974        |
| C4-N17(O2)        | 1.5211        | 0.6184        | C17-N23(O2)      | 1.4737        | 0.7988        | C4-N23(H2)        | 1.4437        | 0.8657        | C19-N23(O2)      | 1.4923        | 0.7377        |
| <b>C1-O5</b>      | <b>1.4152</b> | <b>0.4405</b> | <b>C16-O3</b>    | <b>1.4148</b> | <b>0.4393</b> | <b>C1-O5</b>      | <b>1.4149</b> | <b>0.4392</b> | <b>C19-O3</b>    | <b>1.4226</b> | <b>0.4139</b> |
| <b>N6-O5</b>      | <b>1.4664</b> | <b>0.1494</b> | <b>N18-O3</b>    | <b>1.4548</b> | <b>0.1696</b> | <b>N6-O5</b>      | <b>1.4548</b> | <b>0.1697</b> | <b>N17-O3</b>    | <b>1.4679</b> | <b>0.1489</b> |
| C2=N7             | 1.2641        | 1.7979        | C17=N19          | 1.2649        | 1.7979        | C2=N7             | 1.2649        | 1.7981        | N16=C18          | 1.2628        | 1.8103        |

**Table S8** Bond lengths (BL) and Laplacian bond order (LBO) of the compounds **P6-1~P6-4**

| Bonds             | BL (Å)        | LBO           | Bonds             | BL (Å)        | LBO           | Bonds             | BL (Å)        | LBO           | Bonds              | BL (Å)        | LBO           |
|-------------------|---------------|---------------|-------------------|---------------|---------------|-------------------|---------------|---------------|--------------------|---------------|---------------|
| <b>P6-1</b>       |               |               | <b>P6-2</b>       |               |               | <b>P6-3</b>       |               |               | <b>P6-4</b>        |               |               |
| C1-C2             | 1.5884        | 0.8210        | C1-C2             | 1.5978        | 0.7900        | C1-C2             | 1.5605        | 0.8782        | <b>C3-C4</b>       | <b>1.6430</b> | <b>0.6312</b> |
| <b>C1-C4</b>      | <b>1.6474</b> | <b>0.6033</b> | C1-C4             | 1.5962        | 0.7848        | <b>C1-C4</b>      | <b>1.7183</b> | <b>0.4037</b> | C3-C19             | 1.5534        | 0.9110        |
| C2-C6             | 1.5575        | 0.9139        | <b>C2-C7</b>      | <b>1.6428</b> | <b>0.6316</b> | C2-C6             | 1.5791        | 0.8294        | C4-C31             | 1.5978        | 0.7900        |
| C3-C4             | 1.5695        | 0.8504        | C3-C4             | 1.5534        | 0.9110        | C3-C4             | 1.5792        | 0.8435        | <b>C5-C6</b>       | <b>1.6429</b> | <b>0.6314</b> |
| C3-C7             | 1.5791        | 0.8295        | <b>C3-C6</b>      | <b>1.6427</b> | <b>0.6320</b> | C3-C7             | 1.5575        | 0.9139        | C5-C20             | 1.5534        | 0.9111        |
| C5-C6             | 1.5792        | 0.8433        | C5-C6             | 1.5977        | 0.7904        | C5-C6             | 1.5695        | 0.8505        | C6-C30             | 1.5978        | 0.7901        |
| <b>C5-C8</b>      | <b>1.7186</b> | <b>0.4031</b> | C5-C8             | 1.5962        | 0.7847        | <b>C5-C8</b>      | <b>1.6476</b> | <b>0.6028</b> | C19-C30            | 1.5962        | 0.7845        |
| C7-C8             | 1.5605        | 0.8784        | C7-C8             | 1.5532        | 0.9115        | C7-C8             | 1.5885        | 0.8210        | C20-C31            | 1.5962        | 0.7845        |
| C1-N29(H2)        | 1.4211        | 0.9208        | C1-N11(H2)        | 1.4349        | 0.8784        | C1-N35(O2)        | 1.5034        | 0.6450        | C3-N13(O2)         | 1.5488        | 0.5493        |
| C1-N32(H2)        | 1.4432        | 0.8620        | C1-N14(H2)        | 1.4561        | 0.8068        | C1-N38(O2)        | 1.5437        | 0.5388        | C4-N16(O2)         | 1.5167        | 0.6334        |
| C2-N14(O2)        | 1.5310        | 0.6001        | C2-N29(O2)        | 1.5169        | 0.6328        | C2-N14(O2)        | 1.5470        | 0.5484        | C5-N7(O2)          | 1.5488        | 0.5492        |
| C3-N17(O2)        | 1.5500        | 0.5400        | C3-N26(O2)        | 1.5488        | 0.5492        | C3-N17(O2)        | 1.5231        | 0.6165        | C6-N10(O2)         | 1.5167        | 0.6334        |
| C4-N23(O2)        | 1.5297        | 0.5741        | <b>C4-N41(O2)</b> | <b>1.6163</b> | <b>0.3480</b> | C4-N41(H2)        | 1.4255        | 0.9102        | <b>C19-N21(O2)</b> | <b>1.6162</b> | <b>0.3480</b> |
| <b>C4-N26(O2)</b> | <b>1.5517</b> | <b>0.5219</b> | C4-N44(O2)        | 1.5126        | 0.6511        | C4-N44(H2)        | 1.3997        | 1.0123        | C19-N44(O2)        | 1.5124        | 0.6516        |
| C5-N35(H2)        | 1.4255        | 0.9103        | C5-N17(H2)        | 1.4351        | 0.8776        | C5-N23(O2)        | 1.5298        | 0.5738        | C20-N24(O2)        | 1.5125        | 0.6514        |
| C5-N38(H2)        | 1.3996        | 1.0127        | C5-N20(H2)        | 1.4560        | 0.8070        | <b>C5-N26(O2)</b> | <b>1.5516</b> | <b>0.5223</b> | <b>C20-N27(O2)</b> | <b>1.6163</b> | <b>0.3480</b> |
| C6-N11(O2)        | 1.5230        | 0.6166        | C6-N23(O2)        | 1.5170        | 0.6324        | C6-N11(O2)        | 1.5499        | 0.5401        | C30-N32(H2)        | 1.4349        | 0.8784        |
| C7-N20(O2)        | 1.5471        | 0.5483        | C7-N32(O2)        | 1.5488        | 0.5493        | C7-N20(O2)        | 1.5311        | 0.6001        | C30-N35(H2)        | 1.4562        | 0.8065        |
| C8-N41(O2)        | 1.5033        | 0.6453        | <b>C8-N35(O2)</b> | <b>1.6166</b> | <b>0.3473</b> | C8-N29(H2)        | 1.4210        | 0.9211        | C31-N38(H2)        | 1.4562        | 0.8065        |
| C8-N44(O2)        | 1.5436        | 0.5391        | C8-N38(O2)        | 1.5124        | 0.6515        | C8-N32(H2)        | 1.4432        | 0.8620        | C31-N41(H2)        | 1.4349        | 0.8784        |

| Bonds         | BL/Å          | LBO           | Bonds         | BL/Å          | LBO           | Bonds        | BL/Å          | LBO           | Bonds        | BL/Å          | LBO           |
|---------------|---------------|---------------|---------------|---------------|---------------|--------------|---------------|---------------|--------------|---------------|---------------|
| <b>P6-1</b>   |               |               | <b>P6-2</b>   |               |               | <b>P6-3</b>  |               |               | <b>P6-4</b>  |               |               |
| C2-O9         | 1.4134        | 0.3597        | C2-O10        | 1.3915        | 0.4407        | C2-O9        | 1.4166        | 0.3624        | <b>C3-O1</b> | <b>1.4106</b> | <b>0.3892</b> |
| C3-O9         | 1.4046        | 0.3992        | <b>C3-O10</b> | <b>1.4107</b> | <b>0.3892</b> | <b>C3-O9</b> | <b>1.4206</b> | <b>0.3384</b> | C6-O1        | 1.3915        | 0.4407        |
| <b>C6-O10</b> | <b>1.4206</b> | <b>0.3383</b> | C6-O9         | 1.3915        | 0.4406        | C6-O10       | 1.4046        | 0.3993        | C4-O2        | 1.3915        | 0.4407        |
| C7-O10        | 1.4166        | 0.3623        | <b>C7-O9</b>  | <b>1.4107</b> | <b>0.3891</b> | C7-O10       | 1.4134        | 0.3596        | <b>C5-O2</b> | <b>1.4106</b> | <b>0.3893</b> |

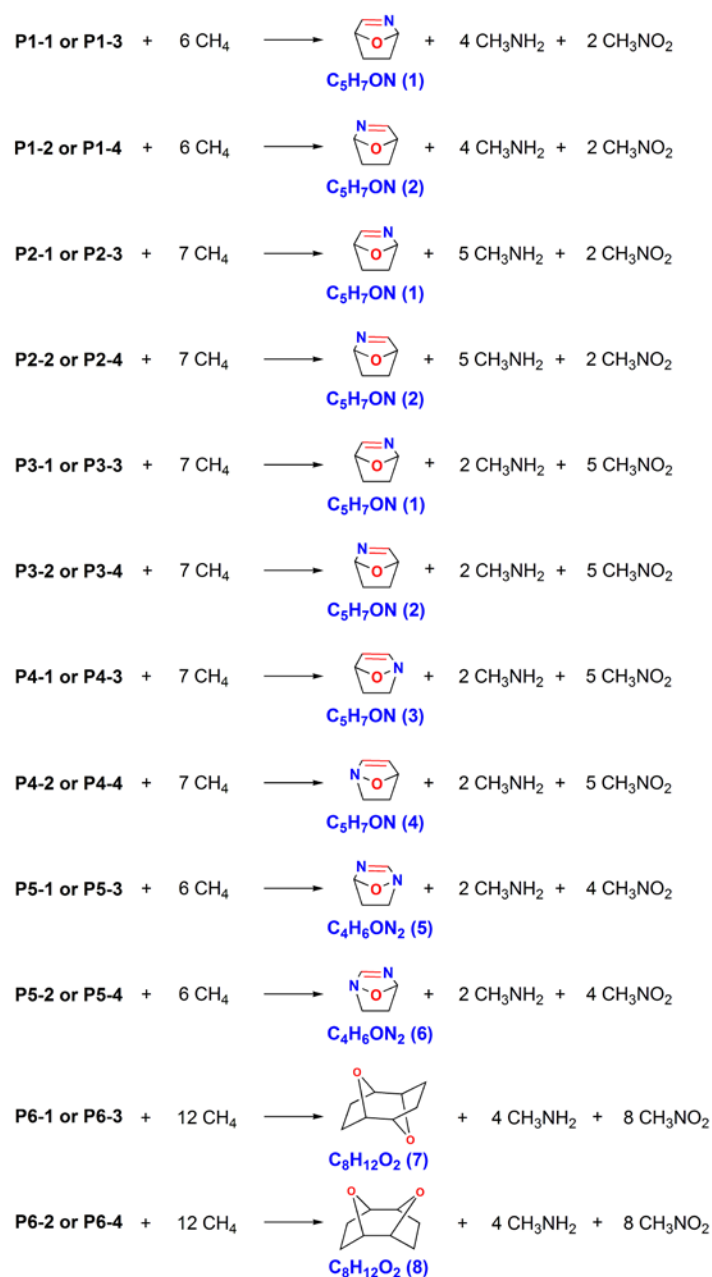

Scheme S1 Isodesmic reactions for the designed bridge-ring energetic compounds

**Table S9**  $E_0$ , ZPE,  $H_T$  and  $\Delta H_{f, \text{gas}}$  of the reference compounds

| Compd.                                            | $E_0^a$ (au) | ZPE <sup>b</sup> (au) | $H_T^b$ (au) | $\Delta H_{f, \text{gas}}$ (kJ·mol <sup>-1</sup> ) |
|---------------------------------------------------|--------------|-----------------------|--------------|----------------------------------------------------|
| CH <sub>4</sub>                                   | -40.5441     | 0.0444                | 0.0038       | -74.60 <sup>c</sup>                                |
| CH <sub>3</sub> -NH <sub>2</sub>                  | -95.9157     | 0.0632                | 0.0043       | -22.50 <sup>c</sup>                                |
| CH <sub>3</sub> -NO <sub>2</sub>                  | -245.1422    | 0.0492                | 0.0053       | -80.80 <sup>c</sup>                                |
| C <sub>5</sub> H <sub>7</sub> ON (1)              | -324.8428    | 0.1159                | 0.0058       | -18.43 <sup>d</sup>                                |
| C <sub>5</sub> H <sub>7</sub> ON (2)              | -324.8428    | 0.1159                | 0.0058       | -18.43 <sup>d</sup>                                |
| C <sub>5</sub> H <sub>7</sub> ON (3)              | -324.7753    | 0.1144                | 0.0059       | 161.30 <sup>d</sup>                                |
| C <sub>5</sub> H <sub>7</sub> ON (4)              | -324.7753    | 0.1144                | 0.0059       | 161.29 <sup>d</sup>                                |
| C <sub>4</sub> H <sub>6</sub> ON <sub>2</sub> (5) | -340.8354    | 0.1035                | 0.0057       | 159.78 <sup>d</sup>                                |
| C <sub>4</sub> H <sub>6</sub> ON <sub>2</sub> (6) | -340.8354    | 0.1035                | 0.0057       | 159.78 <sup>d</sup>                                |
| C <sub>8</sub> H <sub>12</sub> O <sub>2</sub> (7) | -462.7472    | 0.1918                | 0.0079       | -329.47 <sup>d</sup>                               |
| C <sub>8</sub> H <sub>12</sub> O <sub>2</sub> (8) | -462.7272    | 0.1921                | 0.0079       | -271.75 <sup>d</sup>                               |

<sup>a</sup> Calculated at b3lyp/def2QZVPP level. <sup>b</sup> Calculated at b3lyp/6-31g(d) level. <sup>c</sup> Obtained from <http://webbook.nist.gov>. <sup>d</sup> Calculated at G2 level.

**Table S10**  $\Delta H_{f, \text{gas}}$ ,  $\Delta H_{\text{sub}}$  and  $\Delta H_{f, \text{solid}}$  of the designed compounds and the related calculation parameters

| Compd.      | $E_0^a$ (au) | ZPE <sup>b</sup> (au) | $H_T^b$ (au) | $A^c$ (Å <sup>2</sup> ) | $\nu\sigma_{\text{tot}}^{2c}$ (kcal·mol <sup>-1</sup> ) <sup>2</sup> | $\Delta H_{f, \text{gas}}$ (kJ·mol <sup>-1</sup> ) | $\Delta H_{\text{sub}}$ (kJ·mol <sup>-1</sup> ) | $\Delta H_{f, \text{solid}}$ (kJ·mol <sup>-1</sup> ) |
|-------------|--------------|-----------------------|--------------|-------------------------|----------------------------------------------------------------------|----------------------------------------------------|-------------------------------------------------|------------------------------------------------------|
| <b>P1-1</b> | -955.5984    | 0.1864                | 0.0160       | 213.994                 | 51.968                                                               | -39.60                                             | 113.34                                          | -152.94                                              |
| <b>P1-2</b> | -955.6003    | 0.1868                | 0.0158       | 214.219                 | 32.515                                                               | -44.09                                             | 103.04                                          | -147.14                                              |
| <b>P1-3</b> | -955.5942    | 0.1858                | 0.0162       | 213.994                 | 51.968                                                               | -39.60                                             | 113.34                                          | -152.94                                              |
| <b>P1-4</b> | -955.6008    | 0.1867                | 0.0158       | 213.688                 | 44.127                                                               | -45.66                                             | 109.28                                          | -154.94                                              |
| <b>P2-1</b> | -1010.9823   | 0.2027                | 0.0176       | 223.656                 | 55.222                                                               | -23.75                                             | 119.60                                          | -143.35                                              |
| <b>P2-2</b> | -1010.9799   | 0.2023                | 0.0175       | 222.290                 | 48.092                                                               | -18.62                                             | 115.49                                          | -134.11                                              |
| <b>P2-3</b> | -1010.9735   | 0.2013                | 0.0178       | 222.580                 | 58.987                                                               | -3.84                                              | 120.78                                          | -124.62                                              |
| <b>P2-4</b> | -1010.9711   | 0.2017                | 0.0178       | 224.016                 | 62.897                                                               | 3.67                                               | 123.22                                          | -119.55                                              |
| <b>P3-1</b> | -1458.5427   | 0.1584                | 0.0211       | 257.586                 | 15.659                                                               | 109.08                                             | 113.85                                          | -4.78                                                |
| <b>P3-2</b> | -1458.5436   | 0.1581                | 0.0212       | 257.137                 | 19.643                                                               | 106.27                                             | 116.87                                          | -10.60                                               |
| <b>P3-3</b> | -1458.5436   | 0.1581                | 0.0212       | 257.136                 | 19.675                                                               | 106.30                                             | 116.90                                          | -10.59                                               |
| <b>P3-4</b> | -1458.5427   | 0.1584                | 0.0211       | 257.585                 | 15.631                                                               | 109.05                                             | 113.83                                          | -4.77                                                |
| <b>P4-1</b> | -1458.4766   | 0.1575                | 0.0214       | 260.618                 | 18.462                                                               | 287.34                                             | 117.95                                          | 169.39                                               |
| <b>P4-2</b> | -1458.4818   | 0.1572                | 0.0214       | 258.923                 | 23.328                                                               | 272.98                                             | 120.65                                          | 152.33                                               |
| <b>P4-3</b> | -1458.4789   | 0.1572                | 0.0214       | 256.128                 | 21.876                                                               | 280.46                                             | 117.99                                          | 162.47                                               |
| <b>P4-4</b> | -1458.4757   | 0.1575                | 0.0214       | 260.262                 | 17.968                                                               | 289.70                                             | 117.35                                          | 172.35                                               |
| <b>P5-1</b> | -1269.9426   | 0.1436                | 0.0186       | 238.093                 | 21.199                                                               | 283.62                                             | 107.53                                          | 176.09                                               |
| <b>P5-2</b> | -1269.9458   | 0.1435                | 0.0185       | 234.940                 | 22.306                                                               | 274.80                                             | 106.68                                          | 168.12                                               |
| <b>P5-3</b> | -1269.9458   | 0.1435                | 0.0185       | 234.936                 | 22.259                                                               | 274.78                                             | 106.64                                          | 168.13                                               |
| <b>P5-4</b> | -1269.9441   | 0.0187                | 0.1434       | 238.565                 | 22.204                                                               | 279.82                                             | 108.52                                          | 171.30                                               |
| <b>P6-1</b> | -2320.9418   | 0.2705                | 0.0335       | 336.477                 | 20.823                                                               | -34.22                                             | 170.39                                          | -204.61                                              |
| <b>P6-2</b> | -2320.9081   | 0.2716                | 0.0327       | 336.329                 | 19.543                                                               | 59.83                                              | 169.30                                          | -109.47                                              |
| <b>P6-3</b> | -2320.9418   | 0.2705                | 0.0335       | 336.475                 | 20.777                                                               | -34.22                                             | 170.36                                          | -204.58                                              |
| <b>P6-4</b> | -2320.9081   | 0.2716                | 0.0327       | 336.332                 | 19.498                                                               | 59.84                                              | 169.26                                          | -109.43                                              |

<sup>a</sup> Calculated at b3lyp/def2QZVPP level. <sup>b</sup> Calculated at b3lyp/6-31g(d) level. <sup>c</sup> Calculated by Multiwfn program.



**Table S11** Surface electrostatic potential parameters of the designed bridge-ring energetic molecules

| Compd. | $A_s$  | $A_s^+$ | $A_s^-$ | $A_s^+/A_s$ | $V_s$ | $V_s^+$ | $V_s^-$ | $V_s^+/V_s^-$ |
|--------|--------|---------|---------|-------------|-------|---------|---------|---------------|
| P1-1   | 213.99 | 97.26   | 116.74  | 45.45%      | 0.88  | 22.05   | -16.75  | -1.32         |
| P1-2   | 214.22 | 98.01   | 116.21  | 45.75%      | 0.68  | 18.52   | -14.35  | -1.29         |
| P1-3   | 214.54 | 98.04   | 116.50  | 45.70%      | 1.14  | 21.23   | -15.77  | -1.35         |
| P1-4   | 213.69 | 95.64   | 118.05  | 44.76%      | 0.70  | 21.90   | -16.48  | -1.33         |
| P2-1   | 223.66 | 101.02  | 122.64  | 45.17%      | -0.12 | 22.48   | -18.73  | -1.20         |
| P2-2   | 222.29 | 105.05  | 117.24  | 47.26%      | 0.22  | 19.61   | -17.15  | -1.14         |
| P2-3   | 222.58 | 105.03  | 117.55  | 47.19%      | 0.56  | 22.26   | -18.84  | -1.18         |
| P2-4   | 224.02 | 97.94   | 126.08  | 43.72%      | -0.05 | 25.11   | -19.59  | -1.28         |
| P3-1   | 257.59 | 113.51  | 144.08  | 44.07%      | 3.82  | 18.96   | -8.11   | -2.34         |
| P3-2   | 257.14 | 106.97  | 150.16  | 41.60%      | 3.23  | 19.95   | -8.68   | -2.30         |
| P3-3   | 257.14 | 106.89  | 150.25  | 41.57%      | 3.23  | 19.96   | -8.68   | -2.30         |
| P3-4   | 257.58 | 113.64  | 143.95  | 44.12%      | 3.82  | 18.94   | -8.12   | -2.33         |
| P4-1   | 260.62 | 125.75  | 134.87  | 48.25%      | 4.31  | 17.03   | -7.54   | -2.26         |
| P4-2   | 258.92 | 108.68  | 150.24  | 41.98%      | 3.31  | 21.08   | -9.54   | -2.21         |
| P4-3   | 256.13 | 107.47  | 148.66  | 41.96%      | 3.20  | 21.27   | -9.87   | -2.16         |
| P4-4   | 260.26 | 119.02  | 141.24  | 45.73%      | 4.01  | 18.31   | -8.03   | -2.28         |
| P5-1   | 238.09 | 103.93  | 134.16  | 43.65%      | 3.30  | 19.15   | -8.99   | -2.13         |
| P5-2   | 234.94 | 96.75   | 138.19  | 41.18%      | 3.08  | 21.80   | -10.03  | -2.17         |
| P5-3   | 234.94 | 96.88   | 138.05  | 41.24%      | 3.08  | 21.77   | -10.04  | -2.17         |
| P5-4   | 238.56 | 104.75  | 133.82  | 43.91%      | 3.53  | 19.05   | -8.62   | -2.21         |
| P6-1   | 336.48 | 126.59  | 209.89  | 37.62%      | 2.07  | 21.08   | -9.40   | -2.24         |
| P6-2   | 336.33 | 123.90  | 212.43  | 36.84%      | 2.63  | 23.22   | -9.37   | -2.48         |
| P6-3   | 336.48 | 126.69  | 209.78  | 37.65%      | 2.07  | 21.07   | -9.40   | -2.24         |
| P6-4   | 336.33 | 124.02  | 212.31  | 36.87%      | 2.63  | 23.19   | -9.37   | -2.47         |
| FOX-7  | 149.74 | 76.59   | 73.15   | 51.15%      | 1.95  | 24.80   | -21.99  | -1.13         |
| RDX    | 199.80 | 100.90  | 98.90   | 50.50%      | 4.20  | 21.40   | -13.36  | -1.60         |
| HMX    | 241.50 | 121.76  | 119.75  | 50.42%      | 5.77  | 23.38   | -12.14  | -1.93         |
| CL-20  | 307.47 | 153.53  | 153.94  | 49.93%      | 6.60  | 21.58   | -8.33   | -2.59         |

$A_s$ ,  $A_s^+$  and  $A_s^-$  are the overall surface area, positive surface area and negative surface area respectively, in  $\text{\AA}^2$ ;  $V_s$ ,  $V_s^+$  and  $V_s^-$  are the overall average value, positive average value and negative average value respectively, in  $\text{kcal}\cdot\text{mol}^{-1}$ .

## References

- 1 L. R. Domingo, M. J. Aurell, P. Perez and R. Contreras, *Tetrahedron*, 2020, **58**, 4417-4423.
- 2 P. Jaramillo, L. R. Domingo, E. Chamorro and P. Perez, *J. Mol. Struct: THEOCHEM*, 2008, **865**, 68-72.
- 3 P. W. Atkins, *Physical Chemistry*, Oxford University Press, Oxford, U.K., 1982.
- 4 Y. H. Joo, B. Twamley, S. Garg and J. M. Shreeve, *Angew. Chem., Int. Ed.*, 2008, **120**, 6332-6335.
- 5 T. Wei, W. Zhu, X. Zhang, Y. Li and H. Xiao, *J. Phys. Chem. A*, 2009, **113**, 9404-9412.
- 6 Q. Wu, W. Zhu and H. Xiao, *J. Chem. Eng. Data*, 2013, **58**, 2748-2762.
- 7 P. Politzer and J. S. Murray, *Cent. Eur. J. Energ. Mater.*, 2011, **8**, 209-220.
- 8 P. Politzer, P. Lane and J. S. Murray, *Cent. Eur. J. Energ. Mater.*, 2011, **8**, 39-52.
- 9 E. F. C. Byrd and B. M. Rice, *J. Phys. Chem. A*, 2006, **110**, 1005-1013.
- 10 T. Lu and F. Chen, *J. Mol. Graph. Model.*, 2012, **38**, 314-323.
- 11 P. Politzer, J. Martinez, J. S. Murray, M. C. Concha and A. Toro-Labbé, *Mol. Phys.*, 2009, **107**, 2095-2101.
- 12 B. M. Rice and E. F. C. Byrd, *J. Comput. Chem.*, 2013, **34**, 2146-2151.
- 13 M. Kamalvand, M. H. Keshavarz and M. Jafari, *Propellants Explos. Pyrotech*, 2015, **40**, 551-557.
- 14 M. Pospíšil, P. Vávra, M. C. Concha, J. S. Murray and P. Politzer, *J. Mol. Model.*, 2010, **16**, 895-901.
- 15 Q. Zhang, J. Zhang, X. Qi and J. M. Shreeve, *J. Phys. Chem. A*, 2014, **118**, 10857-10865.
